# Supplementary material for: Divergent decennial trends in mental health according to age reveal poorer mental health for young people: repeated cross-sectional population-based surveys from the HUNT Study, Norway
Source: PubMed Central journal article supplement — BMJ Open. 2022 May 17;12(5):e057654. doi: 10.1136/bmjopen-2021-057654 (PMC9119156; doi:10.1136/bmjopen-2021-057654), 2022-05-17
Supplement: bmjopen-2021-057654.draft_revisions.pdf [file bmjopen-2021-057654.draft_revisions.pdf]

# BMJ Open

BMJ Open is committed to open peer review. As part of this commitment we make the peer review history of every article we publish publicly available.

When an article is published we post the peer reviewers' comments and the authors' responses online. We also post the versions of the paper that were used during peer review. These are the versions that the peer review comments apply to.

The versions of the paper that follow are the versions that were submitted during the peer review process. They are not the versions of record or the final published versions. They should not be cited or distributed as the published version of this manuscript.

BMJ Open is an open access journal and the full, final, typeset and author-corrected version of record of the manuscript is available on our site with no access controls, subscription charges or pay-per-view fees (<http://bmjopen.bmj.com>).

If you have any questions on BMJ Open's open peer review process please email [info.bmjopen@bmj.com](mailto:info.bmjopen@bmj.com)

# BMJ Open

## Paradoxical trends in mental health in the society and the root causes of increased mental health problems among young people. The HUNT Study, Norway

|                               |                                                                                                                                                                                                                                                                                                                                                                                                                                                                                                                                                                                                                                                                                                                                                                                                                                                                                                                                                                                                                                                            |
|-------------------------------|------------------------------------------------------------------------------------------------------------------------------------------------------------------------------------------------------------------------------------------------------------------------------------------------------------------------------------------------------------------------------------------------------------------------------------------------------------------------------------------------------------------------------------------------------------------------------------------------------------------------------------------------------------------------------------------------------------------------------------------------------------------------------------------------------------------------------------------------------------------------------------------------------------------------------------------------------------------------------------------------------------------------------------------------------------|
| Journal:                      | <i>BMJ Open</i>                                                                                                                                                                                                                                                                                                                                                                                                                                                                                                                                                                                                                                                                                                                                                                                                                                                                                                                                                                                                                                            |
| Manuscript ID                 | bmjopen-2021-057654                                                                                                                                                                                                                                                                                                                                                                                                                                                                                                                                                                                                                                                                                                                                                                                                                                                                                                                                                                                                                                        |
| Article Type:                 | Original research                                                                                                                                                                                                                                                                                                                                                                                                                                                                                                                                                                                                                                                                                                                                                                                                                                                                                                                                                                                                                                          |
| Date Submitted by the Author: | 26-Sep-2021                                                                                                                                                                                                                                                                                                                                                                                                                                                                                                                                                                                                                                                                                                                                                                                                                                                                                                                                                                                                                                                |
| Complete List of Authors:     | Krokstad, Steinar; Norwegian University of Science and Technology, UNT Research Centre, Department of Public Health and Nursing; Nord-Trøndelag Hospital Trust, Levanger Hospital<br>Weiss, Daniel; Nord Universitetet, Faculty of Social Sciences<br>Krokstad, Morten; Nord Universitet - Levanger Campus, Faculty of Health Sciences and Nursing<br>Rangul, Vegar; Norwegian University of Science and Technology; Nord Universitet - Levanger Campus, Faculty of Health Sciences and Nursing<br>Kvaløy, Kirsti; Norwegian University of Science and Technology, HUNT Research Centre<br>Ingul, Jo; Nord-Trøndelag Hospital Trust, Levanger Hospital<br>Bjerkeset, Ottar; Nord Universitet - Levanger Campus, Faculty of Health Sciences and Nursing<br>Twenge, Jean; San Diego State University, Department of Psychology, College of Sciences<br>Sund, Erik; Norwegian University of Science and Technology, HUNT Research Centre, Department of Public Health and Nursing; Nord Universitet - Levanger Campus, Faculty of Health Sciences and Nursing |
| Keywords:                     | MENTAL HEALTH, PUBLIC HEALTH, EPIDEMIOLOGY, SOCIAL MEDICINE                                                                                                                                                                                                                                                                                                                                                                                                                                                                                                                                                                                                                                                                                                                                                                                                                                                                                                                                                                                                |
|                               |                                                                                                                                                                                                                                                                                                                                                                                                                                                                                                                                                                                                                                                                                                                                                                                                                                                                                                                                                                                                                                                            |

SCHOLARONE™  
Manuscripts

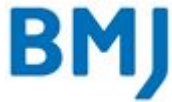

I, the Submitting Author has the right to grant and does grant on behalf of all authors of the Work (as defined in the below author licence), an exclusive licence and/or a non-exclusive licence for contributions from authors who are: i) UK Crown employees; ii) where BMJ has agreed a CC-BY licence shall apply, and/or iii) in accordance with the terms applicable for US Federal Government officers or employees acting as part of their official duties; on a worldwide, perpetual, irrevocable, royalty-free basis to BMJ Publishing Group Ltd ("BMJ") its licensees and where the relevant Journal is co-owned by BMJ to the co-owners of the Journal, to publish the Work in this journal and any other BMJ products and to exploit all rights, as set out in our [licence](#).

The Submitting Author accepts and understands that any supply made under these terms is made by BMJ to the Submitting Author unless you are acting as an employee on behalf of your employer or a postgraduate student of an affiliated institution which is paying any applicable article publishing charge ("APC") for Open Access articles. Where the Submitting Author wishes to make the Work available on an Open Access basis (and intends to pay the relevant APC), the terms of reuse of such Open Access shall be governed by a Creative Commons licence – details of these licences and which [Creative Commons](#) licence will apply to this Work are set out in our licence referred to above.

Other than as permitted in any relevant BMJ Author's Self Archiving Policies, I confirm this Work has not been accepted for publication elsewhere, is not being considered for publication elsewhere and does not duplicate material already published. I confirm all authors consent to publication of this Work and authorise the granting of this licence.

Manuscript v26.9.2021 BMJOpen

1  
2  
3  
4  
5  
6  
7  
8  
9  
10  
11  
12  
13  
14  
15  
16  
17  
18  
19  
20  
21  
22  
23  
24  
25  
26  
27  
28  
29  
30  
31  
32  
33  
34  
35  
36  
37  
38  
39  
40  
41  
42  
43  
44  
45  
46  
47  
48  
49  
50  
51  
52  
53  
54  
55  
56  
57  
58  
59  
60

## Paradoxical trends in mental health in the society and the root causes of increased mental health problems among young people. The HUNT Study, Norway

Steinar Krokstad (000-0002-2932-6675), Daniel Albert Weiss, Morten Austheim Krokstad, Vegar Rangul, Kirsti Kvaløy, Jo Magne Ingul, Ottar Bjerkeset, Jean Marie Twenge, Erik Reidar Sund.

Steinar Krokstad, professor, HUNT Research Centre, Department of Public Health and Nursing, Norwegian University of Science and Technology, 7600 Levanger, Norway.

Daniel Albert Weiss, associate professor, Nord University, Faculty of Social Sciences, Universitetsalléen 11, 8026 Bodø, Norway.

Morten Austheim Krokstad, PhD Fellow, Faculty of Health Sciences and Nursing, Nord University, 7600 Levanger, Norway.

Vegar Rangul, associate professor, HUNT Research Centre, Department of Public Health and Nursing, Norwegian University of Science and Technology, 7600 Levanger, Norway.

Kirsti Kvaløy, professor, HUNT Research Centre, Department of Public Health and Nursing, Norwegian University of Science and Technology, 7600 Levanger, Norway.

Jo Magne Ingul, psychologist, Levanger Hospital, Nord-Trøndelag Hospital Trust, 7600 Levanger, Norway.

Ottar Bjerkeset, professor, Faculty of Health Sciences and Nursing, Nord University, 7600 Levanger, Norway.

Jean Marie Twenge, professor, Department of Psychology, College of Sciences, San Diego State University, San Diego, CA 92182-4611, USA.

Erik Reidar Sund, senior researcher, HUNT Research Centre, Department of Public Health and Nursing, Norwegian University of Science and Technology, 7600 Levanger, Norway.

Correspondence to: Steinar Krokstad (000-0002-2932-6675) [steinar.krokstad@ntnu.no](mailto:steinar.krokstad@ntnu.no)

## Abstract

**Objectives.** Public health trends are formed by political, economic, historical, and cultural factors in society. The aim of this study was to examine changes in mental health among adolescents and adults over three decades, and discuss these changes based on current understandings of health promotion and disease prevention strategies.

**Design.** Repeated population-based health surveys to monitor decennial changes.

**Setting.** Data from three cross-sectional surveys in 1995-97, 2006-08 and 2017-19 in the population-based HUNT Study in Norway were used.

**Participants.** The general population in a Norwegian County covering participants aged 13 to 79 years, ranging from 48 000 to 62 000 in each survey.

**Main outcome measures.** Prevalence estimates of subjective anxiety and depression symptoms stratified by age and gender were assessed using the Hopkins Symptom Check-List 5 (HSCL-5) for adolescents and the Hospital Anxiety and Depression Scale (HADS) for adults.

**Results.** Adolescents' and young adults' mental distress increased sharply, especially between 2006-08 and 2017-19. However, depressive symptoms instead declined among adults ages 60 and over.

**Conclusions.** Our data from the HUNT Study in Norway indicate a strong increase in mental health symptoms among adolescents and young adults that we suggest to be related to marked behavioral changes in the population driven by economic and political factors and the increased use of information technology.

## Strengths and limitations of this study

- The HUNT Study is a large general county population health survey repeated every decade since the 1980s in Norway, suitable to follow trends in public health
- The total population 13+ years are invited to the surveys with no upper age limit
- Identical screening tools for measuring mental symptoms have been used in all three surveys covered by this article; Hopkins Symptoms Check List 5 for adolescents and Hospital Anxiety and Depression Scale for adults
- Data covered approximately 70% of the total adolescent population and 70% to 54% of the total adult population with the risk of selection bias
- Changes in socio-cultural and behavioral attitudes towards depression, anxiety, and mental health in general the recent years, may have made it easier for participants to report mental health concerns and express emotion in questionnaires

Manuscript v26.9.2021 BMJOpen

1  
2  
3  
4  
5  
6  
7  
8  
9  
10  
11  
12  
13  
14  
15  
16  
17  
18  
19  
20  
21  
22  
23  
24  
25  
26  
27  
28  
29  
30  
31  
32  
33  
34  
35  
36  
37  
38  
39  
40  
41  
42  
43  
44  
45  
46  
47  
48  
49  
50  
51  
52  
53  
54  
55  
56  
57  
58  
59  
60

For peer review only

Manuscript v26.9.2021 BMJOpen

## Introduction

Mental health problems are among the leading causes of disease burden worldwide.<sup>1,2</sup> Further, mental health issues are primary drivers of disability worldwide, causing over 40 million years of disability in 20 to 29-year-olds.<sup>3</sup> Depression alone accounts for more disability-adjusted life years (DALYs) than all other mental disorders together<sup>4</sup> and is projected to become the leading cause of disability in high-income countries by 2030.<sup>5</sup> Thus, the public health burden of mood disorders is substantial, with negative effects including functional problems, reduced quality of life, disability, low work productivity, increased mortality, and increased health care utilization.

In Norway, estimates of years lived with disability in 2016, display anxiety and depression ranked as number four and seven on the list of the most contributing diseases in the Global Burden of Disease statistics.<sup>6</sup> Mental disorders are highly prevalent in disability benefit statistics, with awards often granted at younger ages than for other diagnoses. Mental disorders have additionally been shown to be responsible for the most working years lost (33.8%) of any disability.<sup>7</sup>

During the last decade, rates of depressive symptoms have increased in several adolescent populations.<sup>8</sup> In the USA, rates of depression, self-harm, and suicide attempts increased substantially in adolescents after 2010.<sup>9-11</sup> On the other hand, data have paradoxically shown an improvement in mental health with age indicating the opposite trend among older people.<sup>12,13</sup>

Several prominent research-based theories and models, which have provided significant support to modern understanding and practice of health promotion and disease prevention, may offer insights into understanding the causes of current trends in mental health. The World Health Organization's Commission on the Social Determinants of Health (SDH), for example, defined the SDH as "the conditions in which people are born, grow, live, work and age" as the fundamental drivers of public health.<sup>14</sup> Thus, when observing emerging trends in population health, it is important to look at the underlying conditions that may drive the changes. The eminent epidemiologist Geoffrey Rose stressed that the determinants of individual cases and the determinants of incidence rates are two different issues. The second seeks the causes of changing incidence of health problems in the population, the question we focus on here.<sup>15</sup> This research argues that political, economic, historical, and cultural trends in Western societies may have affected mental health by influencing changes in social living conditions. Neoliberalism has been the dominating political ideology in our part of the world since the 1980s. Economic growth has been the main priority of the neoliberal agenda, together with the deregulation of economies, forcing open national and international markets to trade.<sup>16</sup> The rapidly growing global unregulated information technology sector collects and mines enormous amounts of data on individuals. The term *dataism* is used to describe the mindset or philosophy created by this trend. Recently, the term has been expanded to describe what the historian Yuval Noah Harari has called an emerging ideology or even a new form of religion.<sup>17</sup> The increase in global interactions has caused a growth in international trade and the exchange of ideas and culture. Consumerism, the increasing polarization due to so-called technologically produced "echo-chambers" in digitally mediated spaces of social interaction are but a few of the trends influencing these developments.<sup>18</sup> Taking selfies, and along with that, improving our image for public consumption have become regular in younger generations.<sup>19</sup>

Driven by these societal and technological trends, the use of Internet began to increase in the early 2000s, and smartphones from 2010. Social media also became more popular after 2010. These trends may have had a significant impact on human behavior, especially among adolescents and young adults. In several large studies, heavy users of such technologies are more likely to be depressed<sup>20</sup> or have lower levels of well-being.<sup>21</sup> Declines in face-to-face social interaction among

Manuscript v26.9.2021 BMJOpen

1  
2  
3 adolescents may also impact even non-users of digital media, increasing the need for social  
4 assurance and reducing opportunities for in-person social interaction. However, need for social  
5 assurance fueled by excessive smartphone use is often not gratified, and eventually leads to greater  
6 loneliness.<sup>22</sup> Some evidence suggests that increased time spent using these technologies and, more  
7 generally, exposure to the evolving modern technological environment may be causes of the sudden  
8 increase in depression since 2010.<sup>9</sup> Furthermore, research on adolescents in Norway has associated  
9 psychiatric problems with sleep quality problems, which are exacerbated by the use of social media  
10 and computer gaming among adolescents.<sup>23-25</sup> In addition, higher academic pressure following the  
11 dominant political preoccupation with competition influencing educational programs may also have  
12 increased mental distress among adolescents and students.<sup>26,27</sup>

13  
14  
15  
16 Based on an understanding of the significant implications of these observed emerging societal  
17 trends, the aim of this paper was to examine the parallel changes in mental health among  
18 adolescents and adults in a Norwegian population over the three last decades.  
19

## 20 21 22 23 Methods

24 The data were taken from three different waves in the Trøndelag Health Study (HUNT), Young-  
25 HUNT1 and HUNT2 (1995-97), Young-HUNT3 and HUNT3 (2006-08) and Young-HUNT4 and HUNT4  
26 (2017-19)(figure 1).<sup>28</sup> The invited participants were the total population in the Nord-Trøndelag  
27 County area aged 13-19 years (Young-HUNT) and 20+ years (HUNT).<sup>29</sup> The numbers and attendance  
28 rates are shown in figure 1. The samples ranged from 8980 to 8066 adolescent participants and from  
29 62 444 to 48 362 adult participants.  
30  
31  
32  
33

34 **Figure 1.** Data collected in the HUNT Study, Norway. Number of participants and attendance rates.<sup>28</sup>  
35  
36  
37  
38

39 Data from the different decades were stratified by age and sex. In the Young-HUNT surveys, we  
40 applied the Hopkins Symptom Checklist-5 (SCL-5). Hopkins Symptom Checklist-25 (SCL-25) is a  
41 widely applied self-report measure of depression and anxiety symptoms. Compared with the SCL-25,  
42 the short form model fit is good and correlations with established measures demonstrate  
43 convergent validity.<sup>30,31</sup> For adults, we applied the Hospital Anxiety and Depression Scale (HADS). The  
44 HADS is a brief 14-item self-report questionnaire, consisting of seven items for the anxiety subscale  
45 (HADS-A) and seven for the depression subscale (HADS-D), each scored on a Likert-scale from 0 (no  
46 symptoms) to 3 (symptoms maximally present). For this study, valid ratings of the HADS-D and  
47 HADS-A were defined as at least five completed items on both subscales. The score of those who  
48 filled in five or six items was based on the sum of completed items multiplied with 7/5 or 7/6,  
49 respectively. We used the conventional cut-off threshold of 8 for the HADS subscales. This cut off  
50 value is found to provide optimal sensitivity and specificity (about 0.80) and a good correlation with  
51 the case of clinical depression based on DSM-III and ICD-8/9 diagnostic criteria [34]. HADS is found  
52 to perform well in assessing the symptom severity and case categorization of anxiety and depressive  
53 disorders in the general population and in somatic, psychiatric and primary care patients.<sup>32</sup>  
54  
55  
56  
57

## 58 Patient and public involvement

59  
60



Manuscript v26.9.2021 BMJOpen

Public stakeholders and patient organizations have been involved in the planning of all HUNT Surveys. No patients were involved in the design or implementation of this specific study. As the study used previously collected data, we did not ask patients or the public to assess the burden of participation. Public stakeholders and patient organizations are involved in dissemination of results from the HUNT Study.

## Results

The percentage of adolescents screening positive for anxiety and depression nearly doubled between 1995-97 and 2017-19, from 15.3% to 29.8%, with most of the increase occurring between 2006-08 and 2017-19 (see Table 1).

**Table 1.** Characteristics for the sample aged 13-19 years. The Young-HUNT Study.<sup>29</sup>

|       |         | Young HUNT1<br>1995-97 |      | Young HUNT3<br>2006-08 |      | Young HUNT4<br>2017-19 |      |
|-------|---------|------------------------|------|------------------------|------|------------------------|------|
|       |         | N                      | %    | N                      | %    | N                      | %    |
| Age   | 13-19 y | 8980                   | 100  | 8199                   | 100  | 8066                   | 100  |
| Sex   |         |                        |      |                        |      |                        |      |
|       | Girls   | 4463                   | 49.7 | 4128                   | 50.4 | 4106                   | 50.9 |
|       | Boys    | 4517                   | 50.3 | 4071                   | 49.6 | 3960                   | 49.1 |
| SCL-5 |         |                        |      |                        |      |                        |      |
|       | Low     | 7412                   | 82.5 | 6441                   | 78.6 | 5410                   | 67.1 |
|       | High    | 1372                   | 15.3 | 1520                   | 18.5 | 2404                   | 29.8 |
|       | Missing | 196                    | 2.2  | 238                    | 2.9  | 252                    | 3.1  |
| Total |         | 8980                   | 100  | 8199                   | 100  | 8066                   | 100  |

The percentage of adults screening positive for depression declined from 9.4% in 1995-97 to 6.7% in 2017-19, and the percentage screening positive for anxiety increased from 12.4% in 1995-97 to 13.4% in 2017-19 (see Table 2).

**Table 2.** Characteristics for the sample aged 20-79 years. The HUNT Study.<sup>28</sup>

|            |         | HUNT2<br>(1995-97) |        | HUNT3<br>(2006-08) |        | HUNT4<br>(2017-19) |        |
|------------|---------|--------------------|--------|--------------------|--------|--------------------|--------|
|            |         | N                  | (%)    | N                  | (%)    | N                  | (%)    |
| Age groups |         |                    |        |                    |        |                    |        |
|            | 20-29 y | 9111               | (14.6) | 4511               | (9.3)  | 6428               | (12.3) |
|            | 30-39 y | 11630              | (18.6) | 6859               | (14.2) | 6755               | (12.9) |
|            | 40-49 y | 13603              | (21.8) | 10012              | (20.7) | 9002               | (17.2) |
|            | 50-59 y | 11058              | (17.7) | 11425              | (23.6) | 10761              | (20.5) |

## Manuscript v26.9.2021 BMJOpen

|                 |         |              |              |              |
|-----------------|---------|--------------|--------------|--------------|
|                 | 60-69 y | 9048 (14.5)  | 9801 (20.3)  | 11186 (21.3) |
|                 | 70-79 y | 7994 (12.8)  | 5754 (11.9)  | 8310 (15.9)  |
| Sex             |         |              |              |              |
|                 | Females | 32991 (52.8) | 26316 (54.4) | 28488 (54.3) |
|                 | Males   | 29453 (47.2) | 22046 (45.6) | 23954 (45.7) |
| HADS Depression |         |              |              |              |
|                 | Low     | 51049 (81.8) | 34301 (70.9) | 35271 (67.3) |
|                 | High    | 5855 (9.4)   | 3453 (7.1)   | 3505 (6.7)   |
|                 | Missing | 5540 (8.9)   | 10608 (21.9) | 13666 (26.1) |
| HADS Anxiety    |         |              |              |              |
|                 | Low     | 44462 (71.2) | 32192 (66.6) | 31594 (60.3) |
|                 | High    | 7736 (12.4)  | 5387 (11.1)  | 7004 (13.4)  |
|                 | Missing | 10246 (16.4) | 10783 (22.3) | 13844 (26.4) |
| Total           |         | 62444 (100)  | 48362 (100)  | 52442 (100)  |

Table 3 shows the trends in prevalence (%) and 95 % confidence interval (CI) for symptoms of poor mental health by age group and sex. Among adolescents, the prevalence of mental health symptoms above the recommended cut-off on the SCL-5 scale<sup>31</sup> was 10.2% for boys and 21.1% for girls in the 1990s. In the latest survey (2017-19), the prevalence had changed to 16.5% for boys and 44.4% for girls, with a particularly strong change in the last ten years for girls (figure 2).

Manuscript v26.9.2021 BMJOpen

**Table 3.** Prevalence (%) and 95 per cent confidence interval (95% CI) for symptoms of poor mental health (HSCL-5 >2.0) by age group and sex. The HUNT Study, Norway.

| Adolescents     |       | Young-HUNT1<br>1995-97 |               | Young-HUNT3<br>2006-08 |               | Young-HUNT 4<br>2017-19 |               | P-value<br>for trend |
|-----------------|-------|------------------------|---------------|------------------------|---------------|-------------------------|---------------|----------------------|
|                 |       | Prevalence             | 95% CI        | Prevalence             | 95% CI        | Prevalence              | 95% CI        |                      |
| HSCL-5          |       |                        |               |                        |               |                         |               |                      |
| Girls           | 13-19 | 21.1                   | (19.9- 22.3)  | 27.3                   | (26.0- 28.7)  | 44.4                    | (42.8- 45.9)  | 0.000                |
| Boys            | 13-19 | 10.2                   | (9.3- 11.1)   | 10.6                   | (9.7- 11.6)   | 16.5                    | (15.4- 17.7)  | 0.000                |
| Adults          |       | HUNT2                  |               | HUNT3                  |               | HUNT4                   |               |                      |
| HADS depression |       |                        |               |                        |               |                         |               |                      |
| Females         | 20-29 | 4.2                    | (3.7 - 4.8)   | 4.6                    | (3.7 - 5.7)   | 10.7                    | (9.5 - 12.0)  | 0.000                |
|                 | 30-39 | 6.9                    | (6.3 - 7.6)   | 6.3                    | (5.5 - 7.2)   | 8.9                     | (7.9 - 10.1)  | 0.004                |
|                 | 40-49 | 9.3                    | (8.6 - 10.0)  | 7.7                    | (6.9 - 8.5)   | 9.0                     | (8.2 - 10.0)  | 0.377                |
|                 | 50-59 | 12.3                   | (11.5 - 13.3) | 9.0                    | (8.3 - 9.9)   | 8.4                     | (7.7 - 9.3)   | 0.000                |
|                 | 60-69 | 14.2                   | (13.2 - 15.3) | 8.8                    | (8.0 - 9.7)   | 7.4                     | (6.7 - 8.2)   | 0.000                |
|                 | 70-79 | 17.5                   | (16.3 - 18.9) | 12.6                   | (11.4 - 14.0) | 7.6                     | (6.8 - 8.5)   | 0.000                |
| Males           | 20-29 | 3.9                    | (3.3 - 4.5)   | 5.8                    | (4.5 - 7.4)   | 10.2                    | (8.7 - 11.9)  | 0.000                |
|                 | 30-39 | 6.9                    | (6.2 - 7.6)   | 7.3                    | (6.2 - 8.6)   | 11.6                    | (10.2 - 13.2) | 0.000                |
|                 | 40-49 | 10.4                   | (9.7 - 11.2)  | 9.0                    | (8.0 - 10.0)  | 10.2                    | (9.0 - 11.4)  | 0.358                |
|                 | 50-59 | 13.6                   | (12.7 - 14.6) | 10.5                   | (9.6 - 11.4)  | 9.4                     | (8.5 - 10.4)  | 0.000                |
|                 | 60-69 | 13.9                   | (12.8 - 15.0) | 11.1                   | (10.2 - 12.1) | 8.4                     | (7.6 - 9.3)   | 0.000                |
|                 | 70-79 | 16.8                   | (15.4 - 18.2) | 13.7                   | (12.4 - 15.2) | 10.5                    | (9.5 - 11.6)  | 0.000                |
| HADS anxiety    |       |                        |               |                        |               |                         |               |                      |
| Females         | 20-29 | 15.5                   | (14.4 - 16.5) | 19.1                   | (17.4 - 21.0) | 32.0                    | (30.1 - 33.9) | 0.000                |
|                 | 30-39 | 17.1                   | (16.1 - 18.1) | 17.8                   | (16.5 - 19.2) | 26.7                    | (25.1 - 28.4) | 0.000                |
|                 | 40-49 | 17.9                   | (17.0 - 18.9) | 17.1                   | (16.0 - 18.2) | 22.1                    | (20.8 - 23.4) | 0.000                |
|                 | 50-59 | 18.6                   | (17.5 - 19.8) | 18.0                   | (17.0 - 19.1) | 20.4                    | (19.3 - 21.6) | 0.028                |
|                 | 60-69 | 18.0                   | (16.7 - 19.3) | 16.4                   | (15.4 - 17.6) | 17.9                    | (16.8 - 19.0) | 0.896                |
|                 | 70-79 | 17.2                   | (15.7 - 18.8) | 17.2                   | (15.8 - 18.8) | 16.2                    | (15.0 - 17.4) | 0.290                |
| Males           | 20-29 | 11.9                   | (10.9 - 13.0) | 12.0                   | (10.2 - 14.2) | 19.0                    | (17.0 - 21.2) | 0.000                |
|                 | 30-39 | 12.9                   | (12.0 - 13.9) | 11.4                   | (10.0 - 12.9) | 18.8                    | (17.0 - 20.7) | 0.000                |
|                 | 40-49 | 14.0                   | (13.2 - 15.0) | 12.5                   | (11.4 - 13.7) | 16.5                    | (15.1 - 18.0) | 0.030                |
|                 | 50-59 | 12.5                   | (11.6 - 13.5) | 11.7                   | (10.8 - 12.7) | 15.2                    | (14.0 - 16.4) | 0.001                |
|                 | 60-69 | 9.2                    | (8.3 - 10.2)  | 8.5                    | (7.6 - 9.4)   | 11.0                    | (10.1 - 12.0) | 0.004                |
|                 | 70-79 | 9.4                    | (8.2 - 10.6)  | 6.5                    | (5.6 - 7.6)   | 8.4                     | (7.5 - 9.4)   | 0.325                |

**Figure 2.** Prevalence (%) of mental health symptoms measured with SCL-5 (cut-off  $\geq 2$ ), from three decades of adolescents in the Young-HUNT Study.

For adults, table 3 shows that an increasing prevalence for depressive symptoms above cut-off with age was observed in both sexes, from around four percent among young adults 20-29 years and around 17% among older people 70-79 years in 1995-97 (figure 3). In contrast to this, the highest prevalence among young women (10.7%), and the lowest among the elderly aged 70-79 (7.6%) were observed in the last survey (2017-19) (figure 3).

**Figure 3.** Prevalence (%) of depression symptoms measured with HADS-D (cut-off  $\geq 8$ ) from three decades, the HUNT Study.

The prevalence of anxiety symptoms above cut-off measured with by HADS-A was similar in all age groups in 1995-97 (table 3); around 10% for men and 17% for women. In the last survey, we observed a markedly higher prevalence of anxiety symptoms for both genders for participants aged 20-39 years (figure 4).

**Figure 4.** Prevalence (%) of anxiety symptoms measured with HADS-A (cut-off  $\geq 8$ ) from three decades, the HUNT Study.

The negative trends among young adults and the positive trends among older participants shown in figures 3 and 4 were statistically significant in almost all groups (appendix table 1).

## Discussion

Results from the large Norwegian population-based HUNT Study of more than 170,000 people showed large increases in the prevalence of mental distress among adolescents and young adults since the 1990s, especially between 2006-08 and 2017-19. These increases were largest among young women, though there were also increases among young men. In contrast, among older adults depression rates declined and anxiety symptoms remained largely unchanged.

### *Possible reasons for change*

To determine the societal causes behind public health trends are challenging. One possibility is higher academic pressure following the dominant neoliberal political preoccupation with competition.<sup>27</sup> When young people's sense of self-worth is dependent on what they achieve in school, it can also lead to anxiety and depression.<sup>26</sup> Another substantial change in Western societies over this time-period has been in technology use. The tech industry's strong influence on young people's behavior based on deliberately manipulative and exploitive strategies<sup>33</sup> may be an important driver of the observed trends among young people in our data.<sup>9</sup> Heavy users of technology, for example, are twice as likely as light users to be depressed or report lower levels of well-being.<sup>9</sup> Other detrimental effects from the overuse of online technologies may include an increase in the prevalence of loneliness seen after 2012<sup>22,34</sup> and reduced hours of sleep among adolescents.<sup>23,24</sup> Some have questioned the suggestion that increased time spent on social media is the leading cause of increasing mental stress among young people, with individual data revealing only a weak association between time use and mental health in a longitudinal study.<sup>35</sup> However, associations at the individual level may be different from the group-level associations we examine here; even non-users of technology may be impacted by the changes in social interaction caused by technology use.<sup>9</sup> Thus, it becomes necessary to look further into the political, historical and cultural context in which these behavioral changes unfold.<sup>15,36</sup>

Manuscript v26.9.2021 BMJOpen

1  
2  
3 Among older segments of the population, who spend less time using online technologies, we see no  
4 similar increase in mental health issues over the study period. In fact, our results highlight rather the  
5 opposite – a decrease in mental health related issues. Such trends have also been observed in other  
6 populations.<sup>12</sup> Older people in Norway benefit from good living conditions with financial security in a  
7 generous welfare state and good prospects of a high life expectancy. Compared to younger adults,  
8 older individuals may also be more skilled at emotional regulation and complex social decision-  
9 making, and better able to cope with the stress of technological developments.<sup>12 37</sup> Hence, the  
10 youngest generation, iGen/GenZ, is affected most negatively by the changes in technology.<sup>38</sup> Other  
11 important social developments such as the climate threat, developments in a globalized labor  
12 market, generally weaker global economic growth and increase in social inequalities in many  
13 western economies, including Norway<sup>39</sup>, may also affect younger people more as they are less likely  
14 to be established and secure.

15  
16  
17  
18 However, the rapid and almost uncontrolled development in the information technology industry,  
19 has taken place without notable political concern in Norway or other western countries, in line with  
20 dominating neoliberal political ideology.<sup>16</sup> This development is saturated with paradoxes. We have  
21 never had greater access to information, nevertheless being so poorly informed. It has never been  
22 easier to contact friends or family, yet the trend is to remain lonely and psychologically stressed. We  
23 are not required to abandon technology altogether, however, it is imperative that the consequences  
24 of these technological developments are to be taken seriously; otherwise we may be at risk of  
25 abandoning an entire generation of young people. Importantly, there is an emerging discussion  
26 concerning why it is necessary to respond to commercial<sup>40</sup> and corporate determinants of health,  
27 reflecting in part a growing appreciation of their enormous power.<sup>41</sup>

### 32 33 *Strengths*

34  
35 The HUNT Study collect data from a total population at approximately ten years intervals, enabling  
36 studies of health changes in the population over time.<sup>28 29</sup> The invitation/sampling of participants,  
37 and methods for measuring mental health, have been conducted using the same methods and  
38 instruments in all three surveys. Large sample sizes have ensured reliable estimates. Health trends in  
39 the county follow both national<sup>42</sup> and international western health trends closely.<sup>43</sup> The population  
40 is stable and relatively homogenous with a low net migration. As part of a national Nordic welfare  
41 state, the population recruited is part of a country with a universal public health service and a school  
42 system where almost everyone attends the same local schools.

### 48 49 *Weaknesses*

50  
51 Our survey data covered approximately 70% of the total adolescent population and 70% to 54% of  
52 the total adult population (as the result of a decrease in participation rate from HUNT2 to HUNT3  
53 among adults). Non-response analyzes for adult participants showed that those who choose not to  
54 participate generally have a higher mortality rate, slightly higher prevalence of chronic illness, and  
55 lower social status than participants.<sup>44</sup> We assess this potential selection bias to influence the  
56 observed trends.

57  
58 Additionally, it is possible to assume that the results are based on changes in socio-cultural and  
59 behavioral attitudes towards depression, anxiety, and mental health in general. In recent years,  
60

1  
2  
3 mental health has received increased attention in the Norwegian society. As a result, it may have  
4 become easier for participants to report mental health concerns and express emotion in  
5 questionnaires. Therefore, a desire by the participant to provide socially desirable responses may  
6 have affected the results. For the adult participants, we used another tool, HADS, which showed the  
7 exact same trend for participants aged 20-39 years as the SCL-5 in adolescents. This supports the  
8 validity of the findings. In addition, results are supported by data from the Norwegian health services  
9 and prescription databases, clearly demonstrating increasing numbers of individuals either referred  
10 for, or in need of, treatment for mental health illness among young people.<sup>45</sup> The increase in  
11 reported mental health issues demonstrated in our data, is also accompanied by an increasing  
12 number of adolescents in the general population referred to mental health services,<sup>46</sup> an increased  
13 use of psychotropic drugs in age groups reporting increasing symptoms,<sup>47</sup> and an increasing number  
14 of young adults in need of social welfare.<sup>48</sup>  
15  
16  
17  
18  
19

### 20 *Relevance*

21  
22 Our results are in line with results suggesting negative trends in mental health observed among  
23 adolescents and young adults internationally<sup>8</sup> and, more specifically, in the USA.<sup>9</sup> The data are of  
24 great interest to public health policy. The undesirable trend has affected many young people and  
25 affected everyday life substantially for large groups in Norway. Based on earlier findings from the  
26 HUNT Study, there is reason to fear that increasing mental health problems may contribute to an  
27 increasing incidence of work-related incapacity in Norway now and in the years to come.<sup>6 49</sup>  
28  
29  
30  
31

### 32 *Need for action*

33  
34 Based on what is outlined in this paper, there is every reason to consider political measures to  
35 protect the young part of the population against increasing mental health distress. With experience  
36 from population-based public health measures, there is reason to believe that increased regulation  
37 of the tech industry, which has enjoyed relatively few restrictions for decades, will be extremely  
38 important when moving forward. Governments and individuals could challenge their role in defining  
39 the dominant narrative, setting the rules by which trade operates, commodifying knowledge and  
40 undermining political, social, and economic rights in our society.<sup>41</sup> Relevant measures could be, but  
41 are not limited to, for example an age limit for use of social media and online computer gaming,  
42 creating increased accountability for the content published by technology companies and their  
43 platforms, regulations to restrict addictive elements of different software, and taxation of the  
44 industry to obtain funding for relevant public health initiatives. However, of greatest concern is  
45 restructuring and regulating the entire economic business model on which many of these tech giants  
46 not only depend on for their enormously powerful profits but have also had a central role in  
47 developing for the deliberate manipulation and exploitation of its most vulnerable users. Such  
48 measures would undoubtedly increase in effectiveness through systematic international  
49 cooperation. In addition, the academic pressure following the dominant political ideology, is  
50 another issue that needs to be addressed.<sup>36</sup>  
51  
52  
53  
54  
55  
56

### 57 *Conclusion*

58  
59 The data from the HUNT Study in Norway indicate a strong and worrying increase in mental health  
60 symptoms among adolescents and young adults, and the opposite trend among the elderly. This

Manuscript v26.9.2021 BMJOpen

1  
2  
3 trend is likely related to marked behavioral changes in adolescents and young adults driven by  
4 neoliberal policy, globalization and an expanding tech industry.<sup>17</sup> It is urgently important that the  
5 health authorities now see the need to implement political measures to reverse the negative trend  
6 concerning young people. The mental health of young generations must not be sacrificed on the  
7 neoliberal altar.  
8  
9

## 10 11 12 Acknowledgments

13 The Trøndelag Health Study (HUNT) is a collaboration between HUNT Research Centre (Faculty of  
14 Medicine and Health Sciences, NTNU, Norwegian University of Science and Technology), Nord-  
15 Trøndelag County Council, Central Norway Regional Health Authority, and the Norwegian Institute of  
16 Public Health.  
17  
18  
19

## 20 21 22 Footnotes

23 Contributors: SK, MAK and ERS planned the study. VR and ERS performed the statistical analyses. SK  
24 drafted the manuscript. All authors contributed to the interpretation of the results and critically  
25 revised the manuscript. All authors approved the final version of the manuscript. SK accepts full  
26 responsibility for the work and/or the conduct of the study, had access to the data, and controlled  
27 the decision to publish. The corresponding author attests that all listed authors meet authorship  
28 criteria and that no others meeting criteria have been omitted.  
29

30  
31 The Corresponding Author has the right to grant on behalf of all authors and does grant on behalf of  
32 all authors, an exclusive license (or nonexclusive for government employees) on a worldwide basis to  
33 the BMJ Publishing Group Ltd to permit this article (if accepted) to be published in BMJ editions and  
34 any other BMJ PGL products and sublicences such use and exploit all subsidiary rights, as set out in  
35 our license.  
36  
37

38 The HUNT Study is publicly funded, and this paper have no external funding. The funding sources  
39 were not involved in the study design; analysis, and interpretation; writing of the report; or the  
40 decision to submit the article for publication. The researchers were independent from funders and  
41 all authors had full access to all of the data (including statistical reports and tables) in the study and  
42 take responsibility for the integrity of the data and the accuracy of the data analysis.  
43  
44

45 All authors have completed the Unified Competing Interest form (available on request from the  
46 corresponding author) and declare: no support from any organisation for the submitted work; no  
47 financial relationships with any organisations that might have an interest in the submitted work in  
48 the previous three years, no other relationships or activities that could appear to have influenced  
49 the submitted work.  
50

51 Ethical approval: This study was approved by the Regional Committees for Medical and Health  
52 Research Ethics; REK sør-øst C, Norway 196364/2020. All participants gave informed consent before  
53 taking part in the HUNT Study.  
54  
55

56 Data sharing: Data from the Trøndelag Health Study (HUNT) is available upon reasonable request to  
57 the HUNT data access committee (hunt@medisin.ntnu.no). The HUNT data access information  
58 (www.ntnu.edu/hunt/data) describes in detail the policy about data availability.  
59  
60

Transparency: The lead author (SK) affirms that the manuscript is an honest, accurate, and transparent account of the study being reported; that no important aspects of the study have been omitted; and any discrepancies from the study as planned have been explained.

## References

1. Global, regional, and national incidence, prevalence, and years lived with disability for 301 acute and chronic diseases and injuries in 188 countries, 1990-2013: a systematic analysis for the Global Burden of Disease Study 2013. *Lancet* 2015;386(9995):743-800. doi: 10.1016/s0140-6736(15)60692-4 [published Online First: 2015/06/13]
2. Patel V, Flisher AJ, Hetrick S, et al. Mental health of young people: a global public-health challenge. *Lancet* 2007;369(9569):1302-13. doi: 10.1016/s0140-6736(07)60368-7 [published Online First: 2007/04/17]
3. Lozano R, Naghavi M, Foreman K, et al. Global and regional mortality from 235 causes of death for 20 age groups in 1990 and 2010: a systematic analysis for the Global Burden of Disease Study 2010. *Lancet* 2012;380(9859):2095-128. doi: 10.1016/s0140-6736(12)61728-0 [published Online First: 2012/12/19]
4. Murray CJ, Vos T, Lozano R, et al. Disability-adjusted life years (DALYs) for 291 diseases and injuries in 21 regions, 1990-2010: a systematic analysis for the Global Burden of Disease Study 2010. *Lancet* 2012;380(9859):2197-223. doi: 10.1016/s0140-6736(12)61689-4 [published Online First: 2012/12/19]
5. Mathers CD, Loncar D. Projections of Global Mortality and Burden of Disease from 2002 to 2030. *PLOS Medicine* 2006;3(11):e442. doi: 10.1371/journal.pmed.0030442
6. Tollånes MC, Knudsen AK, Vollset SE, et al. Disease burden in Norway in 2016. *Tidsskr Nor Laegeforen* 2018;138(15) doi: 10.4045/tidsskr.18.0274 [published Online First: 2018/10/03]
7. Knudsen AK, Øverland S, Hotopf M, et al. Lost working years due to mental disorders: an analysis of the Norwegian disability pension registry. *PLoS One* 2012;7(8):e42567. doi: 10.1371/journal.pone.0042567 [published Online First: 2012/08/21]
8. Bor W, Dean AJ, Najman J, et al. Are child and adolescent mental health problems increasing in the 21st century? A systematic review. *Aust N Z J Psychiatry* 2014;48(7):606-16. doi: 10.1177/0004867414533834 [published Online First: 2014/05/16]
9. Twenge JM. Why increases in adolescent depression may be linked to the technological environment. *Curr Opin Psychol* 2020;32:89-94. doi: 10.1016/j.copsyc.2019.06.036 [published Online First: 2019/08/16]
10. Twenge JM, Cooper AB, Joiner TE, et al. Age, period, and cohort trends in mood disorder indicators and suicide-related outcomes in a nationally representative dataset, 2005-2017. *J Abnorm Psychol* 2019;128(3):185-99. doi: 10.1037/abn0000410 [published Online First: 2019/03/15]
11. Keyes KM, Gary D, O'Malley PM, et al. Recent increases in depressive symptoms among US adolescents: trends from 1991 to 2018. *Soc Psychiatry Psychiatr Epidemiol* 2019;54(8):987-96. doi: 10.1007/s00127-019-01697-8 [published Online First: 2019/04/01]



Manuscript v26.9.2021 BMJOpen

12. Thomas ML, Kaufmann CN, Palmer BW, et al. Paradoxical Trend for Improvement in Mental Health With Aging: A Community-Based Study of 1,546 Adults Aged 21-100 Years. *J Clin Psychiatry* 2016;77(8):e1019-25. doi: 10.4088/JCP.16m10671 [published Online First: 2016/08/26]
13. Zivin K, Pirraglia PA, McCammon RJ, et al. Trends in depressive symptom burden among older adults in the United States from 1998 to 2008. *J Gen Intern Med* 2013;28(12):1611-9. doi: 10.1007/s11606-013-2533-y [published Online First: 2013/07/10]
14. Braveman P, Gottlieb L. The social determinants of health: it's time to consider the causes of the causes. *Public Health Rep* 2014;129 Suppl 2(Suppl 2):19-31. doi: 10.1177/00333549141291s206 [published Online First: 2014/01/05]
15. Rose G. Sick individuals and sick populations. *Int J Epidemiol* 2001;30(3):427-32; discussion 33-4. doi: 10.1093/ije/30.3.427 [published Online First: 2001/06/21]
16. Ostry JD, Loungani P, Furceri D. Neoliberalism: oversold. *Finance & development* 2016;53(2):38-41.
17. Harari YN. *Homo Deus: A brief history of tomorrow*: Random House 2016.
18. Harris T. How technology hijacks people's minds—from a magician and Google's design ethicist. *Medium Magazine* 2016
19. Creativity C. Top 9 trends of global culture during the last 15 years *Culture & Creativity*; 2021 [Available from: <https://www.culturepartnership.eu/en/article/top-9-trends-of-the-last-decade> accessed 08.02. 2021.
20. Lin LY, Sidani JE, Shensa A, et al. ASSOCIATION BETWEEN SOCIAL MEDIA USE AND DEPRESSION AMONG U.S. YOUNG ADULTS. *Depress Anxiety* 2016;33(4):323-31. doi: 10.1002/da.22466 [published Online First: 2016/01/20]
21. Keles B, McCrae N, Grealish A. A systematic review: the influence of social media on depression, anxiety and psychological distress in adolescents. *International Journal of Adolescence and Youth* 2020;25(1):79-93. doi: 10.1080/02673843.2019.1590851
22. Kim J-H. Longitudinal Associations Among Psychological Issues and Problematic Use of Smartphones: A Two-Wave Cross-Lagged Study. *Journal of media psychology* 2019;31(3):117-27. doi: 10.1027/1864-1105/a000234
23. Keyes KM, Maslowsky J, Hamilton A, et al. The great sleep recession: changes in sleep duration among US adolescents, 1991-2012. *Pediatrics* 2015;135(3):460-8. doi: 10.1542/peds.2014-2707 [published Online First: 2015/02/18]
24. Twenge JM, Krizan Z, Hisler G. Decreases in self-reported sleep duration among U.S. adolescents 2009-2015 and association with new media screen time. *Sleep Med* 2017;39:47-53. doi: 10.1016/j.sleep.2017.08.013 [published Online First: 2017/11/22]
25. Hestetun I, Svendsen MV, Oellingrath IM. Sleep problems and mental health among young Norwegian adolescents. *Nord J Psychiatry* 2018;72(8):578-85. doi: 10.1080/08039488.2018.1499043 [published Online First: 2018/10/10]
26. Pascoe MC, Hetrick SE, Parker AG. The impact of stress on students in secondary school and higher education. *International Journal of Adolescence and Youth* 2020;25(1):104-12. doi: 10.1080/02673843.2019.1596823
27. Cosma A, Stevens G, Martin G, et al. Cross-National Time Trends in Adolescent Mental Well-Being From 2002 to 2018 and the Explanatory Role of Schoolwork Pressure. *J Adolesc Health* 2020;66(6s):S50-s58. doi: 10.1016/j.jadohealth.2020.02.010 [published Online First: 2020/05/25]
28. Krokstad S, Langhammer A, Hveem K, et al. Cohort Profile: the HUNT Study, Norway. *Int J Epidemiol* 2013;42(4):968-77. doi: 10.1093/ije/dys095 [published Online First: 2012/08/11]
29. Holmen TL, Bratberg G, Krokstad S, et al. Cohort profile of the Young-HUNT Study, Norway: a population-based study of adolescents. *Int J Epidemiol* 2014;43(2):536-44. doi: 10.1093/ije/dys232 [published Online First: 2013/02/06]

- 1
- 2
- 3
- 4 30. Schmalbach B, Zenger M, Tibubos AN, et al. Psychometric Properties of Two Brief Versions of the
- 5 Hopkins Symptom Checklist: HSCL-5 and HSCL-10. *Assessment* 2019;1073191119860910.
- 6 doi: 10.1177/1073191119860910 [published Online First: 2019/07/06]
- 7 31. Strand BH, Dalgard OS, Tambs K, et al. Measuring the mental health status of the Norwegian
- 8 population: a comparison of the instruments SCL-25, SCL-10, SCL-5 and MHI-5 (SF-36). *Nord J*
- 9 *Psychiatry* 2003;57(2):113-8. doi: 10.1080/08039480310000932 [published Online First:
- 10 2003/05/15]
- 11 32. Bjelland I, Dahl AA, Haug TT, et al. The validity of the Hospital Anxiety and Depression Scale. An
- 12 updated literature review. *J Psychosom Res* 2002;52(2):69-77. doi: 10.1016/s0022-
- 13 3999(01)00296-3 [published Online First: 2002/02/08]
- 14 33. Thompson N. Tristan Harris: Tech is 'downgrading humans.' it's time to fight back. *Wired*
- 15 [https://www](https://www.wired.com/story/tristan-harris-tech-is-downgrading-humans-time-to-fight-back)
- 16 [wired com/story/tristan-harris-tech-is-downgrading-humans-time-to-fight-back](https://www.wired.com/story/tristan-harris-tech-is-downgrading-humans-time-to-fight-back)
- 17 2019
- 18 34. Twenge JM, Campbell WK. Media Use Is Linked to Lower Psychological Well-Being: Evidence
- 19 from Three Datasets. *Psychiatr Q* 2019;90(2):311-31. doi: 10.1007/s11126-019-09630-7
- 20 [published Online First: 2019/03/13]
- 21 35. Coyne SM, Rogers AA, Zurcher JD, et al. Does time spent using social media impact mental
- 22 health?: An eight year longitudinal study. *Computers in human behavior* 2020;104:106160.
- 23 doi: 10.1016/j.chb.2019.106160
- 24 36. Verhaeghe P. What about me? The struggle for identity in a market-based society. London:
- 25 Scribe Publications Pty Ltd 2014.
- 26 37. Worthy DA, Gorlick MA, Pacheco JL, et al. With age comes wisdom: decision making in younger
- 27 and older adults. *Psychol Sci* 2011;22(11):1375-80. doi: 10.1177/0956797611420301
- 28 [published Online First: 2011/10/01]
- 29 38. Twenge JM, Sherman RA, Wells BE. Sexual Inactivity During Young Adulthood Is More Common
- 30 Among U.S. Millennials and iGen: Age, Period, and Cohort Effects on Having No Sexual
- 31 Partners After Age 18. *Arch Sex Behav* 2017;46(2):433-40. doi: 10.1007/s10508-016-0798-z
- 32 [published Online First: 2016/08/03]
- 33 39. Strand BH, Steingrimsdóttir Ó A, Grøholt EK, et al. Trends in educational inequalities in cause
- 34 specific mortality in Norway from 1960 to 2010: a turning point for educational inequalities
- 35 in cause specific mortality of Norwegian men after the millennium? *BMC Public Health*
- 36 2014;14:1208. doi: 10.1186/1471-2458-14-1208 [published Online First: 2014/11/25]
- 37 40. Kickbusch I. Addressing the interface of the political and commercial determinants of health.
- 38 *Health Promot Int* 2012;27(4):427-8. doi: 10.1093/heapro/das057 [published Online First:
- 39 2012/11/13]
- 40 41. McKee M, Stuckler D. Revisiting the Corporate and Commercial Determinants of Health. *Am J*
- 41 *Public Health* 2018;108(9):1167-70. doi: 10.2105/ajph.2018.304510 [published Online First:
- 42 2018/07/20]
- 43 42. Krokstad S, Westin S. Disability in society-medical and non-medical determinants for disability
- 44 pension in a Norwegian total county population study. *Soc Sci Med* 2004;58(10):1837-48.
- 45 doi: 10.1016/s0277-9536(03)00409-x [published Online First: 2004/03/17]
- 46 43. Trends in adult body-mass index in 200 countries from 1975 to 2014: a pooled analysis of 1698
- 47 population-based measurement studies with 19.2 million participants. *Lancet*
- 48 2016;387(10026):1377-96. doi: 10.1016/s0140-6736(16)30054-x [published Online First:
- 49 2016/04/27]
- 50 44. Langhammer A, Krokstad S, Romundstad P, et al. The HUNT study: participation is associated
- 51 with survival and depends on socioeconomic status, diseases and symptoms. *BMC Med Res*
- 52 *Methodol* 2012;12:143. doi: 10.1186/1471-2288-12-143 [published Online First: 2012/09/18]
- 53 45. Hartz I, Skurtveit S, Steffenak AKM, et al. Psychotropic drug use among 0–17 year olds during
- 54 2004–2014: a nationwide prescription database study. *BMC Psychiatry* 2016;16(1):12. doi:
- 55 10.1186/s12888-016-0716-x
- 56
- 57
- 58
- 59
- 60

Manuscript v26.9.2021 BMJOpen

- 1  
2  
3 46. Wæhre A, Schorkopf M. Gender variance, medical treatment and our responsibility. *Tidsskr Nor*  
4 *Laegeforen* 2019;139(7) doi: 10.4045/tidsskr.19.0178 [published Online First: 2019/04/11]  
5  
6 47. Furu K, Hjellevik V, Hartz I, et al. Legemiddelbruk hos barn og unge i Norge 2008-2017. Oslo:  
7 Folkehelseinstituttet, 2018.  
8 48. Kaltenbrunner Bernitz B, Grees N, Jakobsson Randers M, et al. Young adults on disability benefits  
9 in 7 countries. *Scand J Public Health* 2013;41(12 Suppl):3-26. doi:  
10 10.1177/1403494813496931 [published Online First: 2013/10/18]  
11 49. Pape K, Bjørngaard JH, Holmen TL, et al. The welfare burden of adolescent anxiety and  
12 depression: a prospective study of 7500 young Norwegians and their families: the HUNT  
13 study. *BMJ Open* 2012;2(6) doi: 10.1136/bmjopen-2012-001942 [published Online First:  
14 2012/11/13]  
15  
16  
17  
18  
19  
20  
21  
22  
23  
24  
25  
26  
27  
28  
29  
30  
31  
32  
33  
34  
35  
36  
37  
38  
39  
40  
41  
42  
43  
44  
45  
46  
47  
48  
49  
50  
51  
52  
53  
54  
55  
56  
57  
58  
59  
60

For peer review only

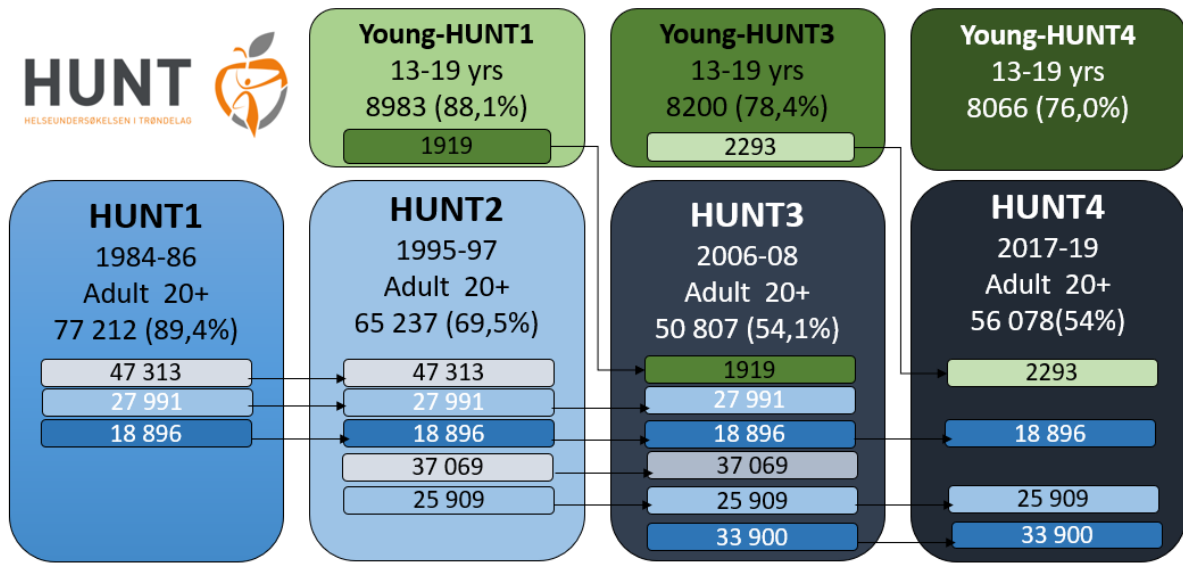

Peer review only

1  
2  
3  
4  
5  
6  
7  
8  
9  
10  
11  
12  
13  
14  
15  
16  
17  
18  
19  
20  
21  
22  
23  
24  
25  
26  
27  
28  
29  
30  
31  
32  
33  
34  
35  
36  
37  
38  
39  
40  
41  
42  
43  
44  
45  
46  
47  
48  
49  
50  
51  
52  
53  
54  
55  
56  
57  
58  
59  
60

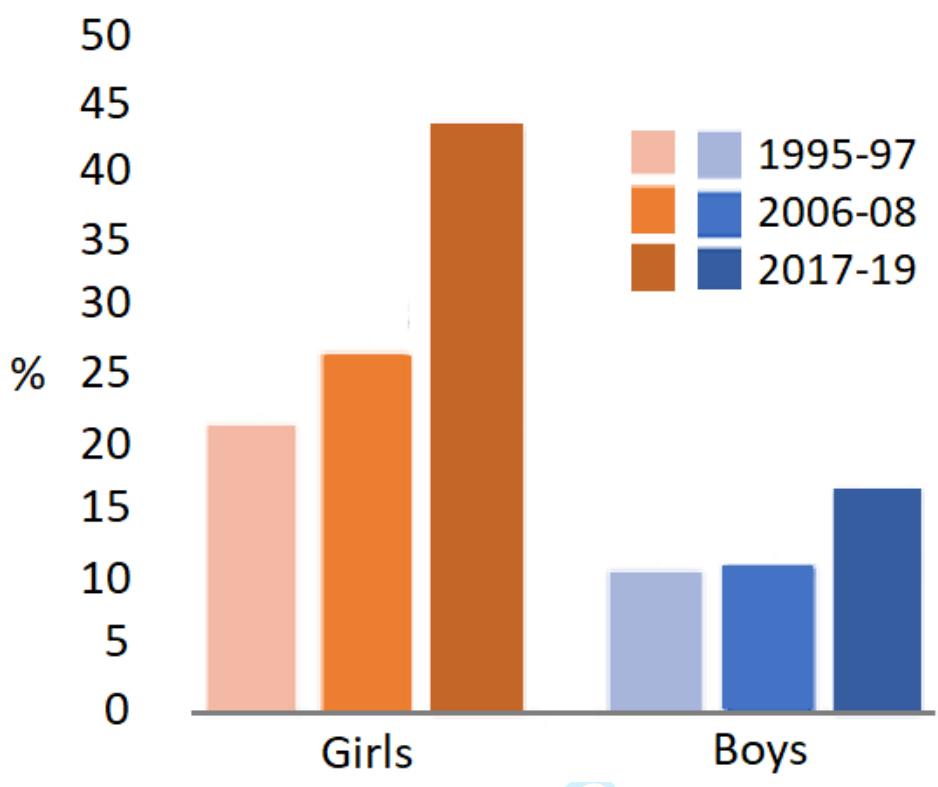

review only

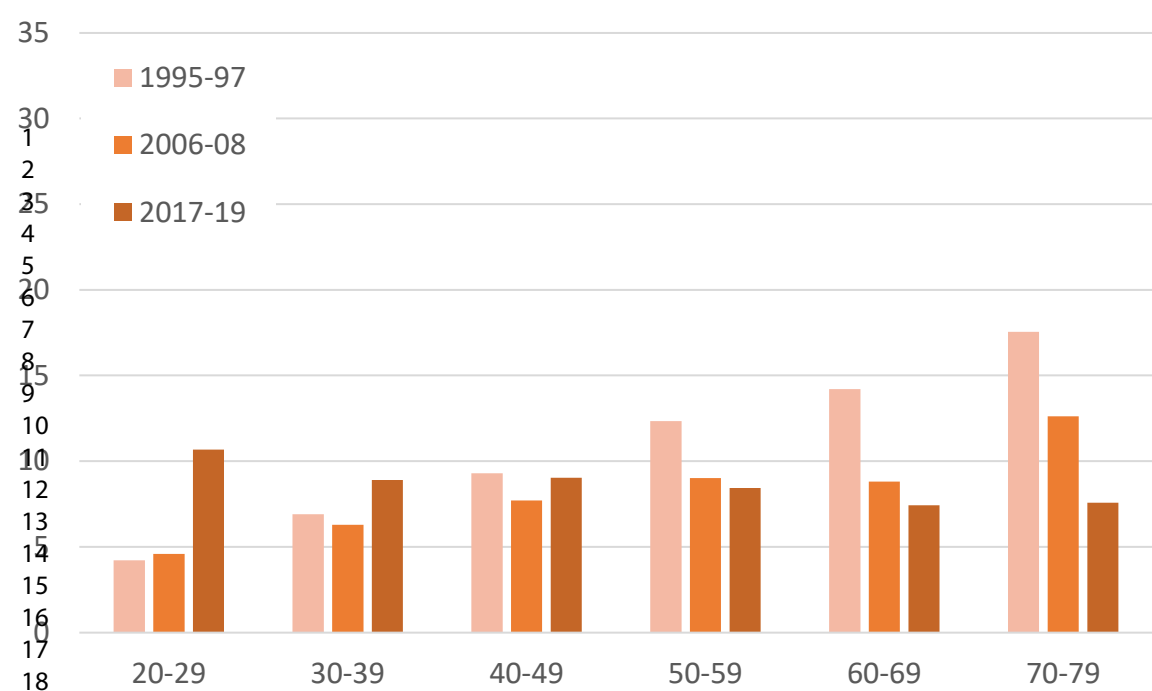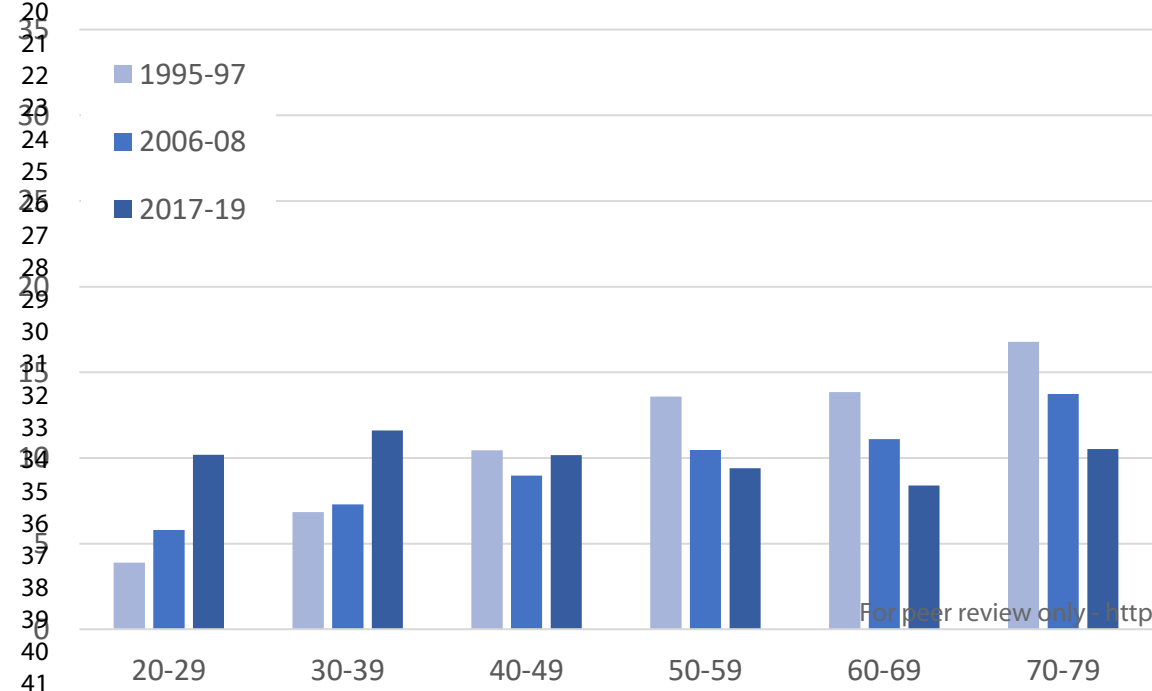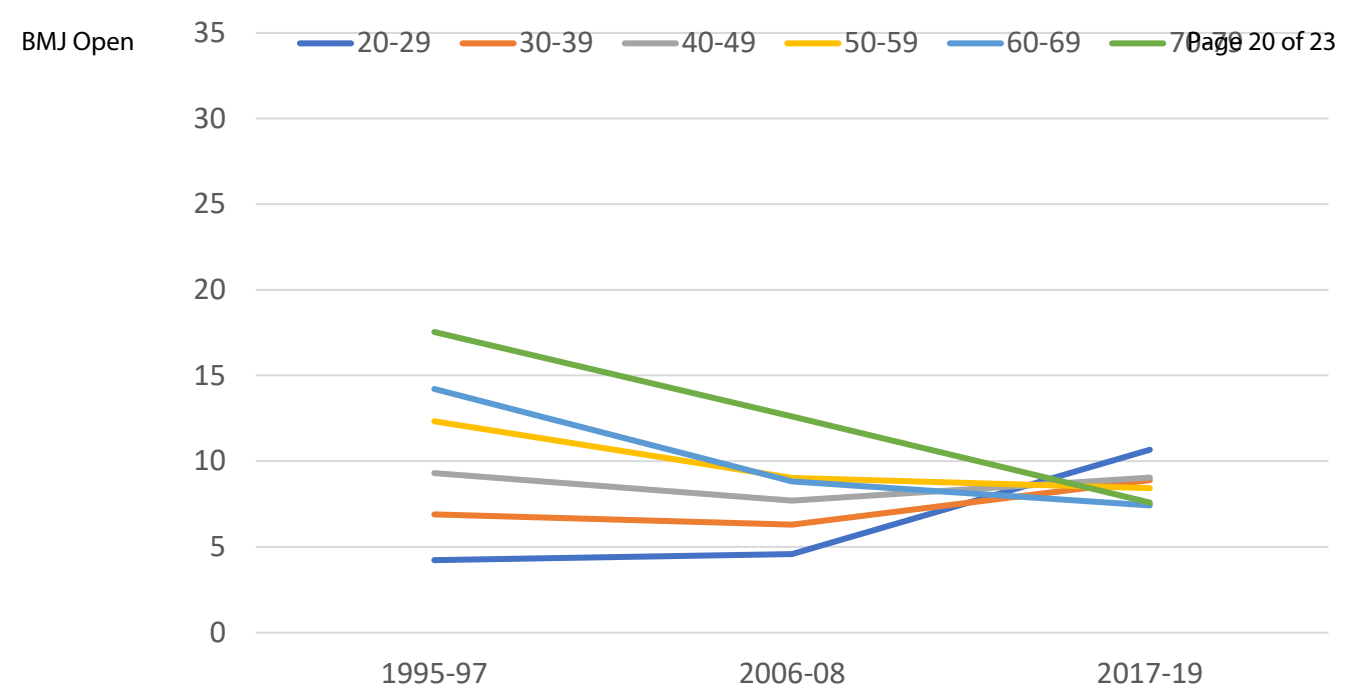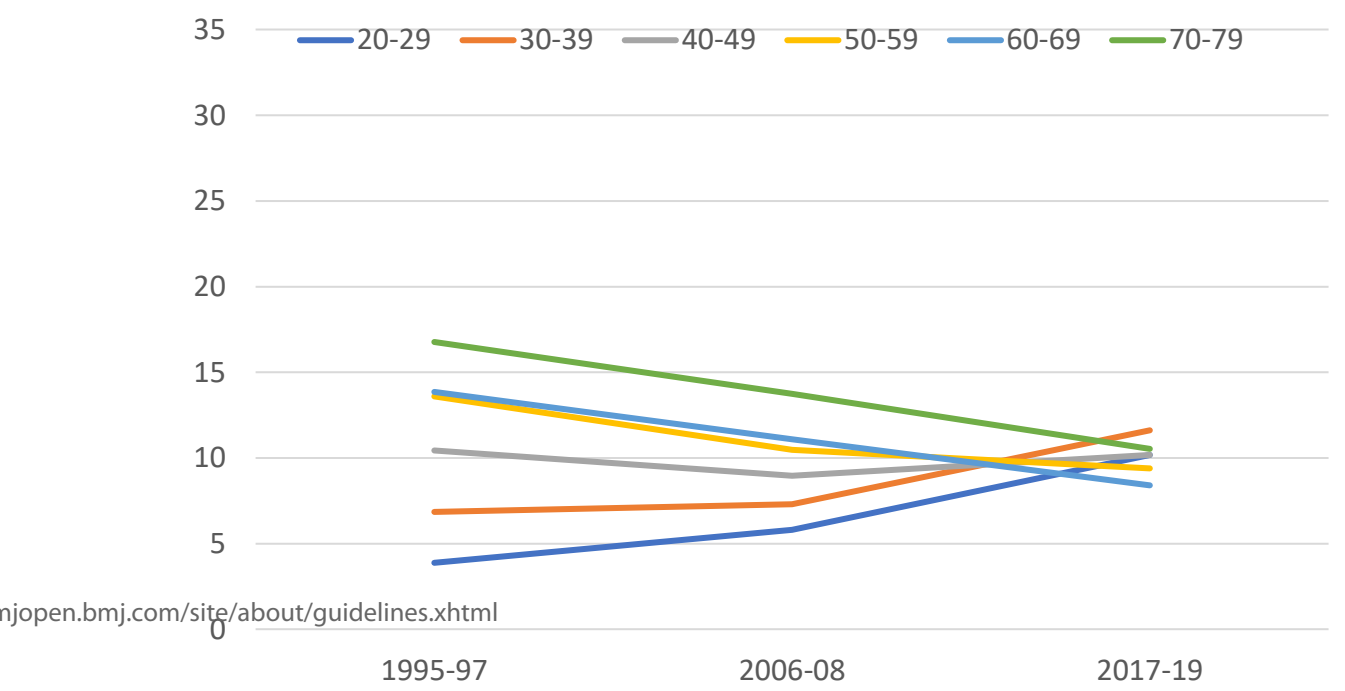

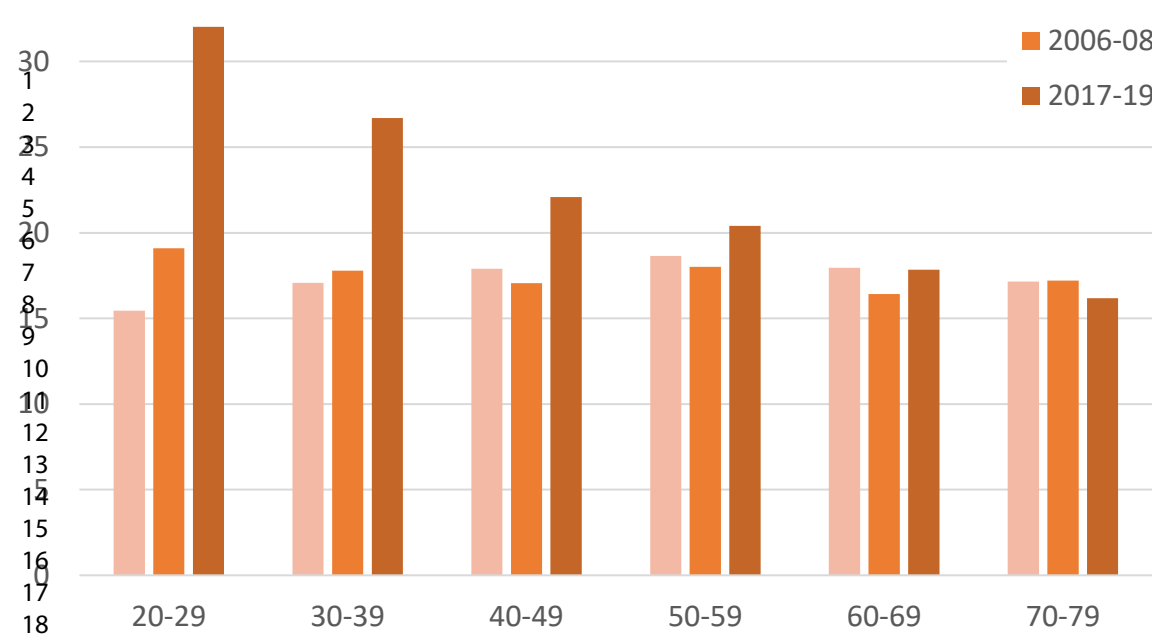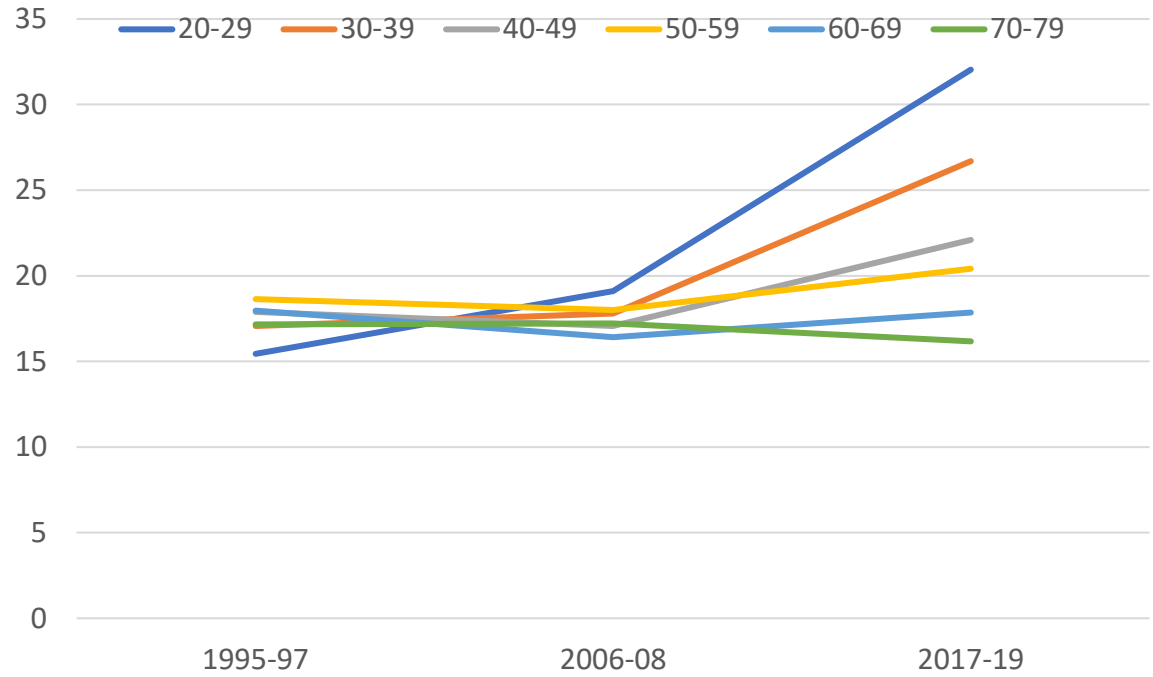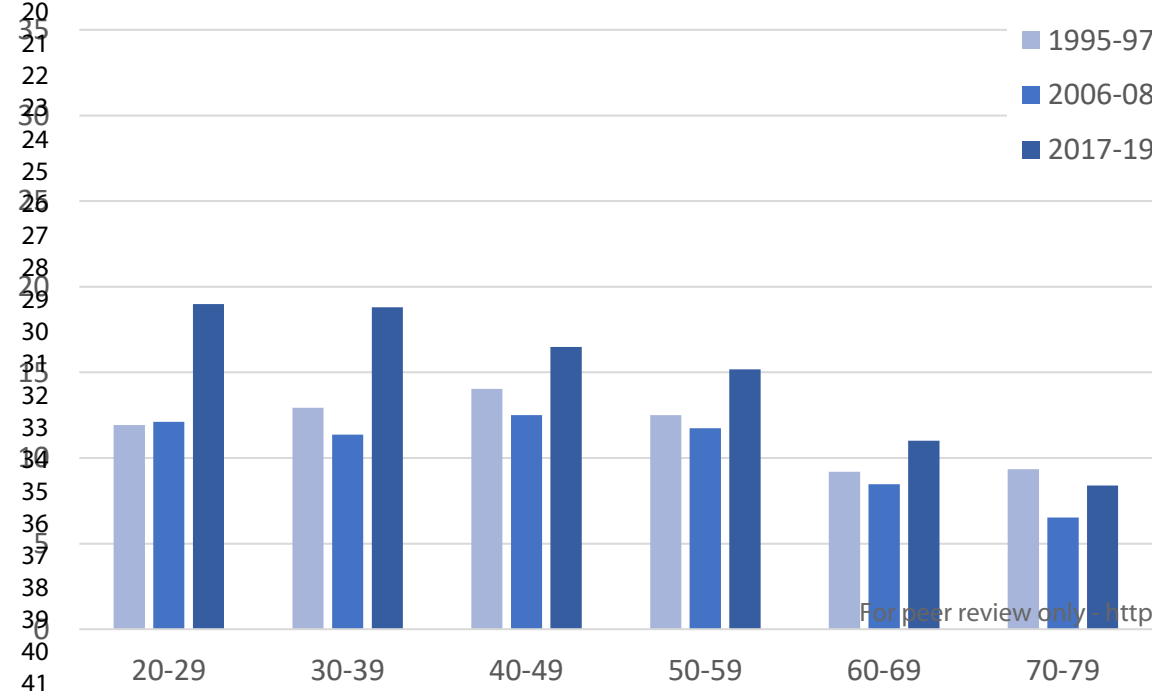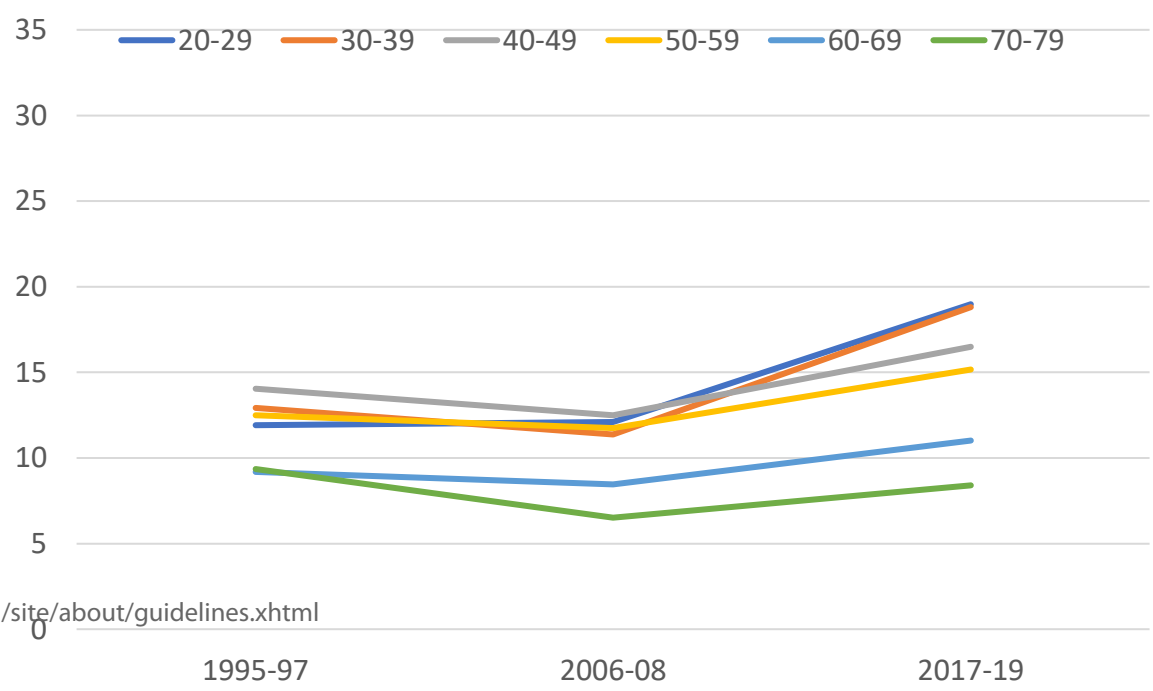

## Appendix table 1

Appendix table 1. Prevalence (%) and 95 percent confidence interval (95% CI) for symptoms of poor mental health by age group and sex.

|                 |       | HUNT2      |               | HUNT3      |               | HUNT4      |               | P-value<br>for trend |
|-----------------|-------|------------|---------------|------------|---------------|------------|---------------|----------------------|
|                 |       | Prevalence | 95% CI        | Prevalence | 95% CI        | Prevalence | 95% CI        |                      |
| HADS depression |       |            |               |            |               |            |               |                      |
| Women           | 20-29 | 4.2        | (3.7 - 4.8)   | 4.6        | (3.7 - 5.7)   | 10.7       | (9.5 - 12.0)  | 0.000                |
|                 | 30-39 | 6.9        | (6.3 - 7.6)   | 6.3        | (5.5 - 7.2)   | 8.9        | (7.9 - 10.1)  | 0.004                |
|                 | 40-49 | 9.3        | (8.6 - 10.0)  | 7.7        | (6.9 - 8.5)   | 9.0        | (8.2 - 10.0)  | 0.377                |
|                 | 50-59 | 12.3       | (11.5 - 13.3) | 9.0        | (8.3 - 9.9)   | 8.4        | (7.7 - 9.3)   | 0.000                |
|                 | 60-69 | 14.2       | (13.2 - 15.3) | 8.8        | (8.0 - 9.7)   | 7.4        | (6.7 - 8.2)   | 0.000                |
|                 | 70-79 | 17.5       | (16.3 - 18.9) | 12.6       | (11.4 - 14.0) | 7.6        | (6.8 - 8.5)   | 0.000                |
| Men             | 20-29 | 3.9        | (3.3 - 4.5)   | 5.8        | (4.5 - 7.4)   | 10.2       | (8.7 - 11.9)  | 0.000                |
|                 | 30-39 | 6.9        | (6.2 - 7.6)   | 7.3        | (6.2 - 8.6)   | 11.6       | (10.2 - 13.2) | 0.000                |
|                 | 40-49 | 10.4       | (9.7 - 11.2)  | 9.0        | (8.0 - 10.0)  | 10.2       | (9.0 - 11.4)  | 0.358                |
|                 | 50-59 | 13.6       | (12.7 - 14.6) | 10.5       | (9.6 - 11.4)  | 9.4        | (8.5 - 10.4)  | 0.000                |
|                 | 60-69 | 13.9       | (12.8 - 15.0) | 11.1       | (10.2 - 12.1) | 8.4        | (7.6 - 9.3)   | 0.000                |
|                 | 70-79 | 16.8       | (15.4 - 18.2) | 13.7       | (12.4 - 15.2) | 10.5       | (9.5 - 11.6)  | 0.000                |
| HADS anxiety    |       |            |               |            |               |            |               |                      |
| Women           | 20-29 | 15.5       | (14.4 - 16.5) | 19.1       | (17.4 - 21.0) | 32.0       | (30.1 - 33.9) | 0.000                |
|                 | 30-39 | 17.1       | (16.1 - 18.1) | 17.8       | (16.5 - 19.2) | 26.7       | (25.1 - 28.4) | 0.000                |
|                 | 40-49 | 17.9       | (17.0 - 18.9) | 17.1       | (16.0 - 18.2) | 22.1       | (20.8 - 23.4) | 0.000                |
|                 | 50-59 | 18.6       | (17.5 - 19.8) | 18.0       | (17.0 - 19.1) | 20.4       | (19.3 - 21.6) | 0.028                |
|                 | 60-69 | 18.0       | (16.7 - 19.3) | 16.4       | (15.4 - 17.6) | 17.9       | (16.8 - 19.0) | 0.896                |
|                 | 70-79 | 17.2       | (15.7 - 18.8) | 17.2       | (15.8 - 18.8) | 16.2       | (15.0 - 17.4) | 0.290                |
| Men             | 20-29 | 11.9       | (10.9 - 13.0) | 12.0       | (10.2 - 14.2) | 19.0       | (17.0 - 21.2) | 0.000                |
|                 | 30-39 | 12.9       | (12.0 - 13.9) | 11.4       | (10.0 - 12.9) | 18.8       | (17.0 - 20.7) | 0.000                |
|                 | 40-49 | 14.0       | (13.2 - 15.0) | 12.5       | (11.4 - 13.7) | 16.5       | (15.1 - 18.0) | 0.030                |
|                 | 50-59 | 12.5       | (11.6 - 13.5) | 11.7       | (10.8 - 12.7) | 15.2       | (14.0 - 16.4) | 0.001                |
|                 | 60-69 | 9.2        | (8.3 - 10.2)  | 8.5        | (7.6 - 9.4)   | 11.0       | (10.1 - 12.0) | 0.004                |
|                 | 70-79 | 9.4        | (8.2 - 10.6)  | 6.5        | (5.6 - 7.6)   | 8.4        | (7.5 - 9.4)   | 0.325                |



STROBE Statement—Checklist of items that should be included in reports of *cross-sectional studies*

The following recommendations were followed if applicable for the manuscript: Paradoxical trends in mental health in the society and the root causes of increased mental health problems among young people. The HUNT Study, Norway.

|                           | Item No | Recommendation                                                                                                                                                                                    | Page in manus. |
|---------------------------|---------|---------------------------------------------------------------------------------------------------------------------------------------------------------------------------------------------------|----------------|
| <b>Title and abstract</b> | 1       | (a) Indicate the study's design with a commonly used term in the title or the abstract                                                                                                            | 2              |
|                           |         | (b) Provide in the abstract an informative and balanced summary of what was done and what was found                                                                                               | 2              |
| <b>Introduction</b>       |         |                                                                                                                                                                                                   |                |
| Background/rationale      | 2       | Explain the scientific background and rationale for the investigation being reported                                                                                                              | 3              |
| Objectives                | 3       | State specific objectives, including any prespecified hypotheses                                                                                                                                  | 4              |
| <b>Methods</b>            |         |                                                                                                                                                                                                   |                |
| Study design              | 4       | Present key elements of study design early in the paper                                                                                                                                           | 4-5            |
| Setting                   | 5       | Describe the setting, locations, and relevant dates, including periods of recruitment, exposure, follow-up, and data collection                                                                   | 4              |
| Participants              | 6       | (a) Give the eligibility criteria, and the sources and methods of selection of participants                                                                                                       | 4              |
| Variables                 | 7       | Clearly define all outcomes, exposures, predictors, potential confounders, and effect modifiers. Give diagnostic criteria, if applicable                                                          | 4-5            |
| Data sources/measurement  | 8*      | For each variable of interest, give sources of data and details of methods of assessment (measurement). Describe comparability of assessment methods if there is more than one group              | 4-5            |
| Bias                      | 9       | Describe any efforts to address potential sources of bias                                                                                                                                         | 11             |
| Study size                | 10      | Explain how the study size was arrived at                                                                                                                                                         | 4              |
| Quantitative variables    | 11      | Explain how quantitative variables were handled in the analyses. If applicable, describe which groupings were chosen and why                                                                      | 4              |
| Statistical methods       | 12      | (a) Describe all statistical methods, including those used to control for confounding                                                                                                             | 4              |
|                           |         | (b) Describe any methods used to examine subgroups and interactions                                                                                                                               | 4              |
|                           |         | (c) Explain how missing data were addressed                                                                                                                                                       | 5-6            |
|                           |         | (d) If applicable, describe analytical methods taking account of sampling strategy                                                                                                                | Na             |
|                           |         | (e) Describe any sensitivity analyses                                                                                                                                                             | Na             |
| <b>Results</b>            |         |                                                                                                                                                                                                   |                |
| Participants              | 13*     | (a) Report numbers of individuals at each stage of study—eg numbers potentially eligible, examined for eligibility, confirmed eligible, included in the study, completing follow-up, and analysed | 4              |
|                           |         | (b) Give reasons for non-participation at each stage                                                                                                                                              | 4              |
|                           |         | (c) Consider use of a flow diagram                                                                                                                                                                |                |
| Descriptive data          | 14*     | (a) Give characteristics of study participants (eg demographic, clinical, social) and information on exposures and potential confounders                                                          | 5              |
|                           |         | (b) Indicate number of participants with missing data for each variable of interest                                                                                                               | 5              |

|                          |     |                                                                                                                                                                                                              |             |
|--------------------------|-----|--------------------------------------------------------------------------------------------------------------------------------------------------------------------------------------------------------------|-------------|
| Outcome data             | 15* | Report numbers of outcome events or summary measures                                                                                                                                                         | 5           |
| Main results             | 16  | (a) Give unadjusted estimates and, if applicable, confounder-adjusted estimates and their precision (eg, 95% confidence interval). Make clear which confounders were adjusted for and why they were included | 6-9         |
|                          |     | (b) Report category boundaries when continuous variables were categorized                                                                                                                                    | 5-9         |
|                          |     | (c) If relevant, consider translating estimates of relative risk into absolute risk for a meaningful time period                                                                                             |             |
| Other analyses           | 17  | Report other analyses done—eg analyses of subgroups and interactions, and sensitivity analyses                                                                                                               | Na          |
| <b>Discussion</b>        |     |                                                                                                                                                                                                              |             |
| Key results              | 18  | Summarise key results with reference to study objectives                                                                                                                                                     | 9           |
| Limitations              | 19  | Discuss limitations of the study, taking into account sources of potential bias or imprecision. Discuss both direction and magnitude of any potential bias                                                   | 11          |
| Interpretation           | 20  | Give a cautious overall interpretation of results considering objectives, limitations, multiplicity of analyses, results from similar studies, and other relevant evidence                                   | 9-10, 11-12 |
| Generalisability         | 21  | Discuss the generalisability (external validity) of the study results                                                                                                                                        | 10          |
| <b>Other information</b> |     |                                                                                                                                                                                                              |             |
| Funding                  | 22  | Give the source of funding and the role of the funders for the present study and, if applicable, for the original study on which the present article is based                                                | 13          |

\*Give information separately for exposed and unexposed groups.

**Note:** An Explanation and Elaboration article discusses each checklist item and gives methodological background and published examples of transparent reporting. The STROBE checklist is best used in conjunction with this article (freely available on the Web sites of PLoS Medicine at <http://www.plosmedicine.org/>, Annals of Internal Medicine at <http://www.annals.org/>, and Epidemiology at <http://www.epidem.com/>). Information on the STROBE Initiative is available at [www.strobe-statement.org](http://www.strobe-statement.org).

# BMJ Open

## Divergent decennial trends in mental health according to age. Which underlying causes may drive the increases in mental health issues for young people? Repeated cross-sectional population-based surveys from the HUNT Study, Norway

|                                 |                                                                                                                                                                                                                                                                                                                                                                                                                                                                                                                                                                                                                                                                                                                                                                                                                                                                                                                                                                                                                                                                                                                                                                                                                                                                                                                                                                                 |
|---------------------------------|---------------------------------------------------------------------------------------------------------------------------------------------------------------------------------------------------------------------------------------------------------------------------------------------------------------------------------------------------------------------------------------------------------------------------------------------------------------------------------------------------------------------------------------------------------------------------------------------------------------------------------------------------------------------------------------------------------------------------------------------------------------------------------------------------------------------------------------------------------------------------------------------------------------------------------------------------------------------------------------------------------------------------------------------------------------------------------------------------------------------------------------------------------------------------------------------------------------------------------------------------------------------------------------------------------------------------------------------------------------------------------|
| Journal:                        | <i>BMJ Open</i>                                                                                                                                                                                                                                                                                                                                                                                                                                                                                                                                                                                                                                                                                                                                                                                                                                                                                                                                                                                                                                                                                                                                                                                                                                                                                                                                                                 |
| Manuscript ID                   | bmjopen-2021-057654.R1                                                                                                                                                                                                                                                                                                                                                                                                                                                                                                                                                                                                                                                                                                                                                                                                                                                                                                                                                                                                                                                                                                                                                                                                                                                                                                                                                          |
| Article Type:                   | Original research                                                                                                                                                                                                                                                                                                                                                                                                                                                                                                                                                                                                                                                                                                                                                                                                                                                                                                                                                                                                                                                                                                                                                                                                                                                                                                                                                               |
| Date Submitted by the Author:   | 28-Feb-2022                                                                                                                                                                                                                                                                                                                                                                                                                                                                                                                                                                                                                                                                                                                                                                                                                                                                                                                                                                                                                                                                                                                                                                                                                                                                                                                                                                     |
| Complete List of Authors:       | Krokstad, Steinar; Norwegian University of Science and Technology, HUNT Research Centre, Department of Public Health and Nursing; Nord-Trøndelag Hospital Trust, Levanger Hospital<br>Weiss, Daniel; Nord Universitetet, Faculty of Social Sciences<br>Krokstad, Morten; Nord Universitet - Levanger Campus, Faculty of Health Sciences and Nursing; Norwegian University of Science and Technology, Department of Mental Health<br>Rangul, Vegar; Norwegian University of Science and Technology, HUNT Research Centre, Department of Public Health and Nursing, Faculty of Medicine and Health Sciences; Nord Universitet - Levanger Campus, Faculty of Health Sciences and Nursing<br>Kvaløy, Kirsti; Norwegian University of Science and Technology, HUNT Research Centre; Nord-Trøndelag Hospital Trust, Levanger Hospital<br>Ingul, Jo; Nord-Trøndelag Hospital Trust, Levanger Hospital<br>Bjerkeset, Ottar; Nord Universitet - Levanger Campus, Faculty of Health Sciences and Nursing; Norwegian University of Science and Technology, Department of Mental Health<br>Twenge, Jean; San Diego State University, Department of Psychology, College of Sciences<br>Sund, Erik; Norwegian University of Science and Technology, HUNT Research Centre, Department of Public Health and Nursing; Nord Universitet - Levanger Campus, Faculty of Health Sciences and Nursing |
| <b>Primary Subject Heading</b>: | Public health                                                                                                                                                                                                                                                                                                                                                                                                                                                                                                                                                                                                                                                                                                                                                                                                                                                                                                                                                                                                                                                                                                                                                                                                                                                                                                                                                                   |
| Secondary Subject Heading:      | Mental health, Epidemiology, Health policy                                                                                                                                                                                                                                                                                                                                                                                                                                                                                                                                                                                                                                                                                                                                                                                                                                                                                                                                                                                                                                                                                                                                                                                                                                                                                                                                      |
| Keywords:                       | MENTAL HEALTH, PUBLIC HEALTH, EPIDEMIOLOGY, SOCIAL MEDICINE                                                                                                                                                                                                                                                                                                                                                                                                                                                                                                                                                                                                                                                                                                                                                                                                                                                                                                                                                                                                                                                                                                                                                                                                                                                                                                                     |
|                                 |                                                                                                                                                                                                                                                                                                                                                                                                                                                                                                                                                                                                                                                                                                                                                                                                                                                                                                                                                                                                                                                                                                                                                                                                                                                                                                                                                                                 |

SCHOLARONE™  
Manuscripts

1  
2  
3  
4  
5  
6  
7  
8  
9  
10  
11  
12  
13  
14  
15  
16  
17  
18  
19  
20  
21  
22  
23  
24  
25  
26  
27  
28  
29  
30  
31  
32  
33  
34  
35  
36  
37  
38  
39  
40  
41  
42  
43  
44  
45  
46  
47  
48  
49  
50  
51  
52  
53  
54  
55  
56  
57  
58  
59  
60



I, the Submitting Author has the right to grant and does grant on behalf of all authors of the Work (as defined in the below author licence), an exclusive licence and/or a non-exclusive licence for contributions from authors who are: i) UK Crown employees; ii) where BMJ has agreed a CC-BY licence shall apply, and/or iii) in accordance with the terms applicable for US Federal Government officers or employees acting as part of their official duties; on a worldwide, perpetual, irrevocable, royalty-free basis to BMJ Publishing Group Ltd ("BMJ") its licensees and where the relevant Journal is co-owned by BMJ to the co-owners of the Journal, to publish the Work in this journal and any other BMJ products and to exploit all rights, as set out in our [licence](#).

The Submitting Author accepts and understands that any supply made under these terms is made by BMJ to the Submitting Author unless you are acting as an employee on behalf of your employer or a postgraduate student of an affiliated institution which is paying any applicable article publishing charge ("APC") for Open Access articles. Where the Submitting Author wishes to make the Work available on an Open Access basis (and intends to pay the relevant APC), the terms of reuse of such Open Access shall be governed by a Creative Commons licence – details of these licences and which [Creative Commons](#) licence will apply to this Work are set out in our licence referred to above.

Other than as permitted in any relevant BMJ Author's Self Archiving Policies, I confirm this Work has not been accepted for publication elsewhere, is not being considered for publication elsewhere and does not duplicate material already published. I confirm all authors consent to publication of this Work and authorise the granting of this licence.

Manuscript revision BMJOpen

1  
2  
3  
4  
5 1  
6  
7  
8  
9 2

Divergent decennial trends in mental health according to age.

10  
11 3

Which underlying causes may drive the increases in mental

12  
13 4

health issues for young people? Repeated cross-sectional

14  
15 5

population-based surveys from the HUNT Study, Norway

16  
17 6

18  
19 7

20  
21 8

Steinar Krokstad (000-0002-2932-6675), Daniel Albert Weiss, Morten Austheim Krokstad, Vegar Rangul, Kirsti Kvaløy, Jo Magne Ingul, Ottar Bjerkeset, Jean Marie Twenge, Erik Reidar Sund.

22  
23 9  
24  
25 10

26  
27 11

Steinar Krokstad, professor, HUNT Research Centre, Department of Public Health and Nursing, Norwegian University of Science and Technology, 7600 Levanger, Norway.

28  
29 12

30  
31 13

Daniel Albert Weiss, associate professor, Nord University, Faculty of Social Sciences, Universitetsalléen 11, 8026 Bodø, Norway.

32  
33 14

34  
35 15

Morten Austheim Krokstad, PhD Fellow, Faculty of Health Sciences and Nursing, Nord University, 7600 Levanger, Norway.

36  
37 16

38  
39 17

Vegar Rangul, associate professor, HUNT Research Centre, Department of Public Health and Nursing, Norwegian University of Science and Technology, 7600 Levanger, Norway.

40  
41 18

42  
43 19

Kirsti Kvaløy, professor, HUNT Research Centre, Department of Public Health and Nursing, Norwegian University of Science and Technology, 7600 Levanger, Norway.

44  
45 20

46  
47 21

Jo Magne Ingul, psychologist, Levanger Hospital, Nord-Trøndelag Hospital Trust, 7600 Levanger, Norway.

48  
49 22

50  
51 23

Ottar Bjerkeset, professor, Faculty of Health Sciences and Nursing, Nord University, 7600 Levanger, Norway.

52  
53 24

54  
55 25

Jean Marie Twenge, professor, Department of Psychology, College of Sciences, San Diego State University, San Diego, CA 92182-4611, USA.

56  
57 26

58  
59 27

Erik Reidar Sund, senior researcher, HUNT Research Centre, Department of Public Health and Nursing, Norwegian University of Science and Technology, 7600 Levanger, Norway.

60  
31

30

Correspondence to: Steinar Krokstad (000-0002-2932-6675) [steinar.krokstad@ntnu.no](mailto:steinar.krokstad@ntnu.no)

1  
2  
3  
4 325  
6 337  
8 34 **Abstract**

9 35 **Objectives.** Public health trends are formed by political, economic, historical, and cultural factors in  
10 36 society. The aim of this paper was to describe overall changes in mental health among adolescents  
11 37 and adults in a Norwegian population over the three last decades and offer some potential  
12 38 explanations for these changes.

13 39 **Design.** Repeated population-based health surveys to monitor decennial changes.

14 40 **Setting.** Data from three cross-sectional surveys in in 1995-97, 2006-08 and 2017-19 in the  
15 41 population-based HUNT Study in Norway were used.

16 42 **Participants.** The general population in a Norwegian County covering participants aged 13 to 79  
17 43 years, ranging from 48 000 to 62 000 in each survey.

18 44 **Main outcome measures.** Prevalence estimates of subjective anxiety and depression symptoms  
19 45 stratified by age and gender were assessed using the Hopkins Symptom Check-List 5 (HSCL-5) for  
20 46 adolescents and the Hospital Anxiety and Depression Scale (HADS) for adults.

21 47 **Results.** Adolescents' and young adults' mental distress increased sharply, especially between 2006-  
22 48 08 and 2017-19. However, depressive symptoms instead declined among adults ages 60 and over  
23 49 and anxiety symptoms remained largely unchanged in these groups.

24 50 **Conclusions.** Our data from the HUNT Study in Norway indicate a strong increase in mental health  
25 51 symptoms among adolescents and young adults that we suggest are related to relevant changes in  
26 52 young people's living conditions and behavior, including the increased influence of screen-based  
27 53 media.

28 54

29 55

30 56

31 57 **Strengths and limitations of this study**

- 32 58 ➤ The HUNT Study is a large general county population health survey repeated every decade since  
33 59 the 1980s in Norway, suitable for following trends in public health
- 34 60 ➤ The total population 13+ years are invited to complete the survey
- 35 61 ➤ Identical screening tools for measuring mental symptoms have been used in all three surveys  
36 62 covered by this article; Hopkins Symptoms Check List 5 for adolescents and Hospital Anxiety and  
37 63 Depression Scale for adults
- 38 64 ➤ Data covered approximately 78% of the total adolescent population and 54% to 70% of the total  
39 65 adult population with the risk of selection bias
- 40 66 ➤ Changes in socio-cultural and behavioral attitudes towards depression, anxiety, and mental  
41 67 health in general the recent years may have made it easier for participants to report mental  
42 68 health concerns and express emotion in questionnaires

43 69

44 70

Manuscript revision BMJOpen

1  
2  
3  
4  
5  
6  
7  
8  
9  
10  
11  
12  
13  
14  
15  
16  
17  
18  
19  
20  
21  
22  
23  
24  
25  
26  
27  
28  
29  
30  
31  
32  
33  
34  
35  
36  
37  
38  
39  
40  
41  
42  
43  
44  
45  
46  
47  
48  
49  
50  
51  
52  
53  
54  
55  
56  
57  
58  
59  
60

70

For peer review only



## 71 Introduction

72 Mental health problems are among the leading causes of disease burden worldwide.<sup>1,2</sup> Further,  
73 mental health issues are primary drivers of disability worldwide, causing over 40 million years of  
74 disability in 20 to 29-year-olds.<sup>3</sup> Depression alone accounts for more disability-adjusted life years  
75 (DALYs) than all other mental disorders together<sup>4</sup> and is projected to become the leading cause of  
76 disability in high-income countries by 2030.<sup>5</sup> Thus, the public health burden of mood disorders is  
77 substantial, with negative effects including functional problems, reduced quality of life, disability,  
78 low work productivity, increased mortality, and increased health care utilization.

79 In Norway, estimates of years lived with disability in 2016, display anxiety and depression ranked as  
80 number four and seven on the list of the most contributing diseases in the Global Burden of Disease  
81 statistics.<sup>6</sup> Mental disorders are highly prevalent in disability benefit statistics, with awards often  
82 granted at younger ages than for other diagnoses. Mental disorders have additionally been shown to  
83 be responsible for the most working years lost (33.8%) of any disability.<sup>7</sup>

84 During the last decade, rates of depressive symptoms have increased in several adolescent  
85 populations.<sup>8-10</sup> In the USA, rates of depression, self-harm, and suicide attempts increased  
86 substantially in adolescents after 2010.<sup>11-13</sup> On the other hand, data have paradoxically shown an  
87 improvement in mental health with age indicating the opposite trend among older people.<sup>14,15</sup>

88 Several prominent research-based theories and models, which have provided significant support to  
89 modern understanding and practice of health promotion and disease prevention, may offer insights  
90 into understanding the causes of current trends in mental health. The World Health Organization's  
91 Commission on the Social Determinants of Health (SDH), for example, defined the SDH as "the  
92 conditions in which people are born, grow, live, work and age" as the fundamental drivers of public  
93 health.<sup>16</sup> Thus, when observing emerging trends in population health, it is important to look at the  
94 underlying conditions that may drive the changes. The eminent epidemiologist Geoffrey Rose  
95 stressed that the determinants of individual cases and the determinants of incidence rates are two  
96 different issues. The second seeks the causes of changing incidence of health problems in the  
97 population, the question we focus on here.<sup>17</sup> This theory argues that political, economic, historical,  
98 and cultural trends in Western societies may have affected mental health by influencing changes in  
99 social living conditions. Neoliberalism has been the dominating political ideology in our part of the  
100 world since the 1980s. Economic growth has been the main priority of the neoliberal agenda,  
101 together with the deregulation of economies, forcing open national and international markets to  
102 trade.<sup>18</sup> This has contributed to major changes in the living conditions of groups in societies around  
103 the world, including young people. For many, optimism and the belief in economic growth and  
104 improved quality of life have been replaced by concerns about climate change, growing social  
105 injustice, threats to democracy and the threat of technological developments leading to increased  
106 exploitation and potentially magnifying many of these other concerns.<sup>19</sup> These concerns have  
107 become particularly visible for young people growing up in many western, developed societies.

108 It has become increasingly apparent that the rapidly growing global unregulated information  
109 technology sector collects and mines enormous amounts of data on individuals.<sup>20</sup> The term *dataism*  
110 is used to describe the mindset or philosophy created by this trend. Recently, the term has been  
111 expanded to describe what others, including leading historian Yuval Noah Harari and leading social  
112 psychologist Shoshana Zuboff, has called an emerging form of capitalism, ideology, or even a new  
113 form of religion.<sup>20,21</sup> The increase in global interactions has caused a growth in international trade  
114 and the exchange of ideas and culture. Consumerism, the increasing polarization due to so-called  
115 technologically produced "echo-chambers" in digitally mediated spaces of social interaction are but

1  
2  
3 116 a few of the trends influencing these developments.<sup>22</sup> Taking selfies, and along with that, improving  
4 117 our image for public consumption have become regular in younger generations.<sup>23</sup>  
5  
6 118 Driven by these societal and technological trends, the use of the internet began to increase in the  
7 119 early 2000s, and smartphones after 2010. Social media also became more popular after 2010. These  
8 120 trends may have had a significant impact on human behavior, especially among adolescents and  
9 121 young adults. In several large studies, heavy users of such technologies are more likely to be  
10 122 depressed<sup>9 24</sup> or have lower levels of well-being.<sup>9 25</sup> Similar analyses from HUNT data in Norway have  
11 123 shown significant effects between the number of hours of screen time and increased mental health  
12 124 issues, particularly strong when this screen time is predominantly the use of social media and  
13 125 internet. These effects are significantly strengthened both for girls and for number of hours.<sup>26</sup>  
14 126 Declines in face-to-face social interaction among adolescents may also impact even non-users of  
15 127 digital media, increasing the need for social assurance and reducing opportunities for in-person  
16 128 social interaction.<sup>27</sup> However, need for social assurance fueled by excessive smartphone use is often  
17 129 not gratified, and eventually leads to greater loneliness.<sup>28</sup> Some evidence suggests that increased  
18 130 time spent using these technologies and, more generally, exposure to the evolving modern  
19 131 technological environment may be causes of the sudden increase in depression since 2010.<sup>11</sup> Girls  
20 132 generally demonstrate stronger associations between digital media time and mental health  
21 133 indicators than boys, perhaps because social media, used more frequently by girls, is more strongly  
22 134 linked to depression than gaming, used more frequently by boys.<sup>9</sup> Furthermore, research on  
23 135 adolescents in Norway has associated psychiatric problems with sleep quality problems, which are  
24 136 exacerbated by the use of social media and computer gaming among adolescents.<sup>29-31</sup> In addition,  
25 137 higher academic pressure following the dominant political preoccupation with competition  
26 138 influencing educational programs may also have increased mental distress among adolescents and  
27 139 students.<sup>32 33</sup> A Norwegian study has shown a clear decline in young people's reporting of happiness  
28 140 and life satisfaction in the last ten years. The study showed that increasing concern about the future  
29 141 contributed most to the decline. This concern was related to fears of various adverse events, such as  
30 142 future job opportunities and one's own financial situation. Other conditions such as dissatisfaction  
31 143 with social relationships, health, physical fitness and body also had significance.<sup>34</sup>  
32  
33 144 The aim of this paper was to describe the parallel changes in mental health among adolescents and  
34 145 adults in a Norwegian population over the three last decades and suggest some potential  
35 146 explanations for these changes.  
36  
37  
38  
39  
40  
41  
42  
43  
44

## 45 148 Methods

46 149 The data were taken from three different waves in the Trøndelag Health Study (HUNT), Young-  
47 150 HUNT1 and HUNT2 (1995-97), Young-HUNT3 and HUNT3 (2006-08) and Young-HUNT4 and HUNT4  
48 151 (2017-19)(figure 1).<sup>35</sup> The invited participants were the total population in the Nord-Trøndelag  
49 152 County area aged 13-19 years (Young-HUNT) and 20+ years (HUNT).<sup>36</sup> The numbers and attendance  
50 153 rates are shown in figure 1. The samples ranged from 8980 to 8066 adolescent participants and from  
51 154 62 444 to 48 362 adult participants.  
52  
53  
54  
55

56 156 **Figure 1.** Data collected in the HUNT Study, Norway. Number of participants and response rates.<sup>35 36</sup>  
57  
58 157  
59  
60

1  
2  
3 158 Data from the different decades were stratified by age and sex. In the Young-HUNT surveys, we  
4 159 applied the Hopkins Symptom Checklist–5 (SCL-5). Hopkins Symptom Checklist–25 (SCL-25) is a  
5 160 widely applied self-report measure of depression and anxiety symptoms. Compared with the SCL-25,  
6 161 the short form model fit is good and correlations with established measures demonstrate  
7 162 convergent validity.<sup>37 38</sup> Prevalence (%) of mental health symptoms was measured with SCL-5 (cut-off  
8 163 > 2). For adults, we applied the Hospital Anxiety and Depression Scale (HADS). The HADS is a brief  
9 164 14-item self-report questionnaire, consisting of seven items for the anxiety subscale (HADS-A) and  
10 165 seven for the depression subscale (HADS-D), each scored on a Likert-scale from 0 (no symptoms) to 3  
11 166 (symptoms maximally present). For this study, valid ratings of the HADS-D and HADS-A were defined  
12 167 as at least five completed items on both subscales. The score of those who filled in five or six items  
13 168 was based on the sum of completed items multiplied with 7/5 or 7/6, respectively. We used the  
14 169 conventional cut-off threshold of  $\geq 8$  for the HADS subscales. This cut off value is found to provide  
15 170 optimal sensitivity and specificity (about 0.80) and a good correlation with the case of clinical  
16 171 depression based on DSM-III and ICD–8/9 diagnostic criteria [34]. HADS is found to perform well in  
17 172 assessing the symptom severity and case categorization of anxiety and depressive disorders in the  
18 173 general population and in somatic, psychiatric and primary care patients.<sup>39</sup> Results are reported as  
19 174 prevalence (in %) along with 95 per cent confidence intervals (95% CI) and we also report p-values  
20 175 for linear trend according to time. Data management and analyses were done with Stata v. 16.<sup>40</sup>

### 176 Patient and public involvement

177 Public stakeholders and patient organizations have been involved in the planning of all HUNT  
178 Surveys. No patients were involved in the design or implementation of this specific study. As the  
179 study used previously collected data, we did not ask patients or the public to assess the burden of  
180 participation. Public stakeholders and patient organizations are involved in dissemination of results  
181 from the HUNT Study.

### 183 Ethical approval

184 This study was approved by the Regional Committees for Medical and Health Research Ethics; REK  
185 sør-øst C, Norway 196364/2020. All participants gave informed consent before taking part in the  
186 HUNT Study.

## 188 Results

189 The percentage of adolescents screening positive for anxiety and depression nearly doubled  
190 between 1995-97 and 2017-19, from 15.3% to 29.8%, with most of the increase occurring between  
191 2006-08 and 2017-19 (see Table 1).

193 **Table 1.** Characteristics for the sample aged 13-19 years. The Young-HUNT Study.<sup>36</sup>

|        |         | Young HUNT1<br>1995-97 |      | Young HUNT3<br>2006-08 |      | Young HUNT4<br>2017-19 |      |
|--------|---------|------------------------|------|------------------------|------|------------------------|------|
|        |         | N                      | %    | N                      | %    | N                      | %    |
| Age    | 13-19 y | 8980                   | 100  | 8199                   | 100  | 8066                   | 100  |
| Sex    |         |                        |      |                        |      |                        |      |
|        | Girls   | 4463                   | 49.7 | 4128                   | 50.4 | 4106                   | 50.9 |
|        | Boys    | 4517                   | 50.3 | 4071                   | 49.6 | 3960                   | 49.1 |
| SCL-5* |         |                        |      |                        |      |                        |      |

## Manuscript revision BMJOpen

|         |      |      |      |      |      |      |
|---------|------|------|------|------|------|------|
| Low     | 7412 | 82.5 | 6441 | 78.6 | 5410 | 67.1 |
| High    | 1372 | 15.3 | 1520 | 18.5 | 2404 | 29.8 |
| Missing | 196  | 2.2  | 238  | 2.9  | 252  | 3.1  |
| Total   | 8980 | 100  | 8199 | 100  | 8066 | 100  |

194 \*Hopkins Symptom Checklist-5 (SCL-5) cut-off  $\geq 2$ .

195

196 The percentage of adults screening positive for depression declined from 9.4% in 1995-97 to 6.7% in  
 197 2017-19, and the percentage screening positive for anxiety increased from 12.4% in 1995-97 to  
 198 13.4% in 2017-19 (see Table 2).

199

200 **Table 2.** Characteristics for the sample aged 20-79 years. The HUNT Study.<sup>35</sup>

|                  | HUNT2<br>(1995-97) |        | HUNT3<br>(2006-08) |        | HUNT4<br>(2017-19) |        |
|------------------|--------------------|--------|--------------------|--------|--------------------|--------|
|                  | N                  | (%)    | N                  | (%)    | N                  | (%)    |
| Age groups       |                    |        |                    |        |                    |        |
| 20-29 y          | 9111               | (14.6) | 4511               | (9.3)  | 6428               | (12.3) |
| 30-39 y          | 11630              | (18.6) | 6859               | (14.2) | 6755               | (12.9) |
| 40-49 y          | 13603              | (21.8) | 10012              | (20.7) | 9002               | (17.2) |
| 50-59 y          | 11058              | (17.7) | 11425              | (23.6) | 10761              | (20.5) |
| 60-69 y          | 9048               | (14.5) | 9801               | (20.3) | 11186              | (21.3) |
| 70-79 y          | 7994               | (12.8) | 5754               | (11.9) | 8310               | (15.9) |
| Sex              |                    |        |                    |        |                    |        |
| Females          | 32991              | (52.8) | 26316              | (54.4) | 28488              | (54.3) |
| Males            | 29453              | (47.2) | 22046              | (45.6) | 23954              | (45.7) |
| HADS Depression* |                    |        |                    |        |                    |        |
| Low              | 51049              | (81.8) | 34301              | (70.9) | 35271              | (67.3) |
| High             | 5855               | (9.4)  | 3453               | (7.1)  | 3505               | (6.7)  |
| Missing          | 5540               | (8.9)  | 10608              | (21.9) | 13666              | (26.1) |
| HADS Anxiety*    |                    |        |                    |        |                    |        |
| Low              | 44462              | (71.2) | 32192              | (66.6) | 31594              | (60.3) |
| High             | 7736               | (12.4) | 5387               | (11.1) | 7004               | (13.4) |
| Missing          | 10246              | (16.4) | 10783              | (22.3) | 13844              | (26.4) |
| Total            | 62444              | (100)  | 48362              | (100)  | 52442              | (100)  |

201 \* Hospital Anxiety and Depression Scale (HADS) cut-off  $\geq 8$ .

202

203 Table 3 shows the trends in prevalence (%) and 95 % confidence interval (95 % CI) for symptoms of  
 204 poor mental health by age group and sex. Among adolescents, the prevalence of mental health  
 205 symptoms above the recommended cut-off on the SCL-5 scale<sup>38</sup> was 10.2% for boys and 21.1% for  
 206 girls in the 1990s. In the latest survey (2017-19), the prevalence had changed to 16.5% for boys and  
 207 44.4% for girls, with a particularly strong change in the last ten years for girls (figure 2).

208

## Manuscript revision BMJOpen

**Table 3.** Prevalence (%) and 95 per cent confidence interval (95% CI) for symptoms of poor mental health by age group and sex. The HUNT Study, Norway.

| Adolescents          |       | Young-HUNT1<br>1995-97 |               | Young-HUNT3<br>2006-08 |               | Young-HUNT 4<br>2017-19 |               | P-value<br>for trend |
|----------------------|-------|------------------------|---------------|------------------------|---------------|-------------------------|---------------|----------------------|
|                      |       | Prevalence             | 95% CI        | Prevalence             | 95% CI        | Prevalence              | 95% CI        |                      |
| HSCL-5*              |       |                        |               |                        |               |                         |               |                      |
| Girls                | 13-19 | 21.1                   | (19.9- 22.3)  | 27.3                   | (26.0- 28.7)  | 44.4                    | (42.8- 45.9)  | 0.000                |
| Boys                 | 13-19 | 10.2                   | (9.3- 11.1)   | 10.6                   | (9.7- 11.6)   | 16.5                    | (15.4- 17.7)  | 0.000                |
| Adults               |       | HUNT2                  |               | HUNT3                  |               | HUNT4                   |               |                      |
| HADS<br>depression** |       |                        |               |                        |               |                         |               |                      |
| Females              | 20-29 | 4.2                    | (3.7 - 4.8)   | 4.6                    | (3.7 - 5.7)   | 10.7                    | (9.5 - 12.0)  | 0.000                |
|                      | 30-39 | 6.9                    | (6.3 - 7.6)   | 6.3                    | (5.5 - 7.2)   | 8.9                     | (7.9 - 10.1)  | 0.004                |
|                      | 40-49 | 9.3                    | (8.6 - 10.0)  | 7.7                    | (6.9 - 8.5)   | 9.0                     | (8.2 - 10.0)  | 0.377                |
|                      | 50-59 | 12.3                   | (11.5 - 13.3) | 9.0                    | (8.3 - 9.9)   | 8.4                     | (7.7 - 9.3)   | 0.000                |
|                      | 60-69 | 14.2                   | (13.2 - 15.3) | 8.8                    | (8.0 - 9.7)   | 7.4                     | (6.7 - 8.2)   | 0.000                |
|                      | 70-79 | 17.5                   | (16.3 - 18.9) | 12.6                   | (11.4 - 14.0) | 7.6                     | (6.8 - 8.5)   | 0.000                |
| Males                | 20-29 | 3.9                    | (3.3 - 4.5)   | 5.8                    | (4.5 - 7.4)   | 10.2                    | (8.7 - 11.9)  | 0.000                |
|                      | 30-39 | 6.9                    | (6.2 - 7.6)   | 7.3                    | (6.2 - 8.6)   | 11.6                    | (10.2 - 13.2) | 0.000                |
|                      | 40-49 | 10.4                   | (9.7 - 11.2)  | 9.0                    | (8.0 - 10.0)  | 10.2                    | (9.0 - 11.4)  | 0.358                |
|                      | 50-59 | 13.6                   | (12.7 - 14.6) | 10.5                   | (9.6 - 11.4)  | 9.4                     | (8.5 - 10.4)  | 0.000                |
|                      | 60-69 | 13.9                   | (12.8 - 15.0) | 11.1                   | (10.2 - 12.1) | 8.4                     | (7.6 - 9.3)   | 0.000                |
|                      | 70-79 | 16.8                   | (15.4 - 18.2) | 13.7                   | (12.4 - 15.2) | 10.5                    | (9.5 - 11.6)  | 0.000                |
| HADS anxiety**       |       |                        |               |                        |               |                         |               |                      |
| Females              | 20-29 | 15.5                   | (14.4 - 16.5) | 19.1                   | (17.4 - 21.0) | 32.0                    | (30.1 - 33.9) | 0.000                |
|                      | 30-39 | 17.1                   | (16.1 - 18.1) | 17.8                   | (16.5 - 19.2) | 26.7                    | (25.1 - 28.4) | 0.000                |
|                      | 40-49 | 17.9                   | (17.0 - 18.9) | 17.1                   | (16.0 - 18.2) | 22.1                    | (20.8 - 23.4) | 0.000                |
|                      | 50-59 | 18.6                   | (17.5 - 19.8) | 18.0                   | (17.0 - 19.1) | 20.4                    | (19.3 - 21.6) | 0.028                |
|                      | 60-69 | 18.0                   | (16.7 - 19.3) | 16.4                   | (15.4 - 17.6) | 17.9                    | (16.8 - 19.0) | 0.896                |
|                      | 70-79 | 17.2                   | (15.7 - 18.8) | 17.2                   | (15.8 - 18.8) | 16.2                    | (15.0 - 17.4) | 0.290                |
| Males                | 20-29 | 11.9                   | (10.9 - 13.0) | 12.0                   | (10.2 - 14.2) | 19.0                    | (17.0 - 21.2) | 0.000                |
|                      | 30-39 | 12.9                   | (12.0 - 13.9) | 11.4                   | (10.0 - 12.9) | 18.8                    | (17.0 - 20.7) | 0.000                |
|                      | 40-49 | 14.0                   | (13.2 - 15.0) | 12.5                   | (11.4 - 13.7) | 16.5                    | (15.1 - 18.0) | 0.030                |
|                      | 50-59 | 12.5                   | (11.6 - 13.5) | 11.7                   | (10.8 - 12.7) | 15.2                    | (14.0 - 16.4) | 0.001                |
|                      | 60-69 | 9.2                    | (8.3 - 10.2)  | 8.5                    | (7.6 - 9.4)   | 11.0                    | (10.1 - 12.0) | 0.004                |
|                      | 70-79 | 9.4                    | (8.2 - 10.6)  | 6.5                    | (5.6 - 7.6)   | 8.4                     | (7.5 - 9.4)   | 0.325                |

\*Hopkins Symptom Checklist-5 (SCL-5) cut-off  $\geq 2$ .

\*\* Hospital Anxiety and Depression Scale (HADS) cut-off  $\geq 8$ .

**Figure 2.** Prevalence (%) of mental health symptoms measured with SCL-5 (cut-off  $\geq 2$ ), from three decades of adolescents in the Young-HUNT Study.

For adults, table 3 shows that an increasing prevalence for depressive symptoms above cut-off with age was observed in both sexes, from around four percent among young adults 20-29 years and around 17% among older people 70-79 years in 1995-97 (figure 3). In contrast to this, the highest

Manuscript revision BMJOpen

1  
2  
3 219 prevalence among young women (10.7%), and the lowest among the elderly aged 70-79 (7.6%) were  
4 220 observed in the last survey (2017-19) (figure 3).

5  
6 221  
7

8 222 **Figure 3.** Prevalence (%) of depression symptoms measured with HADS-D (cut-off  $\geq 8$ ) from three  
9 223 decades, the HUNT Study.

10 224  
11  
12

13 225 The prevalence of anxiety symptoms above cut-off measured with by HADS-A was similar in all age  
14 226 groups in 1995-97 (table 3); around 10% for men and 17% for women. In the last survey, we  
15 227 observed a markedly higher prevalence of anxiety symptoms for both genders for participants aged  
16 228 20-39 years (figure 4).

17  
18 229  
19

20 230 **Figure 4.** Prevalence (%) of anxiety symptoms measured with HADS-A (cut-off  $\geq 8$ ) from three  
21 231 decades, the HUNT Study.

22 232  
23  
24

25 233 The negative trends among young adults and the positive trends among older participants shown in  
26 234 figures 3 and 4 were statistically significant in almost all groups (appendix table 1).

27  
28 235  
29

## 30 236 Discussion

31 237 Results from the large Norwegian population-based HUNT Study of more than 170,000 people  
32 238 showed large increases in the prevalence of mental distress among adolescents and young adults  
33 239 since the 1990s, especially between 2006-08 and 2017-19. These increases were largest among  
34 240 young women, though there were also increases among young men. In contrast, among older adults  
35 241 depression rates declined and anxiety symptoms remained largely unchanged.

36  
37 242  
38

### 39 243 *Possible reasons for change*

40  
41 244 An important question is whether the increases in mental health issues were influenced by changes  
42 245 in socio-cultural and behavioral attitudes towards depression, anxiety, and mental health in general.  
43 246 In recent years, mental health has received increased attention in the Norwegian society. As a result,  
44 247 it may have become easier for participants to report mental health concerns and express emotion in  
45 248 questionnaires. Therefore, a desire by the participant to provide socially desirable responses may  
46 249 have affected the results. For the adult participants, we have used a different tool than for  
47 250 adolescents, HADS, which showed the exact same trend for participants aged 20-39 years as the SCL-  
48 251 5 in adolescents and opposite trends for the elderly. This supports the validity of our findings. In  
49 252 addition, results are supported by data from the Norwegian health services and prescription  
50 253 databases, clearly demonstrating increasing numbers of individuals either referred for, or in need of,  
51 254 treatment for mental health illness among young people.<sup>41</sup> The increase in reported mental health  
52 255 issues demonstrated in our data, is also accompanied by an increasing number of adolescents in the  
53 256 general population referred to mental health services,<sup>42</sup> an increased use of psychotropic drugs in  
54 257 age groups reporting increasing symptoms,<sup>43</sup> and an increasing number of young adults in need of  
55 258 social welfare.<sup>44</sup> In addition, similar increases in mental health issues in countries such as the U.S.

Manuscript revision BMJOpen

1  
2  
3 259 have been accompanied by concurrent increases in hospital admissions for self-harm behaviors and  
4 260 suicide attempts that cannot be attributed to changes in survey self-reports.<sup>45 46</sup> It is possible to  
5 261 suggest that all these changes are due to trends in increasing socio-cultural openness towards  
6 262 mental health issues, however in parallel with the changes we see in our data, behavioral data  
7 263 showing similar trends<sup>41</sup> and a clear decline in young people's reporting of happiness and life  
8 264 satisfaction over the last ten years,<sup>34</sup> this seems unlikely.

9  
10  
11 265 Thus, taken together, evidence seems to suggest that the observed trends in poorer mental health  
12 266 among young people are real. To determine the causes behind such public health trends, is,  
13 267 however, challenging. Younger generations clearly face concerns that did not exist to the same  
14 268 extent even 10, 20 or 30 years ago. These include climate change, growing social injustice,<sup>47</sup>  
15 269 emerging threats to democratic institutions and the consequences of modern technological  
16 270 developments.<sup>19</sup> In addition, higher academic pressure reflects the dominant neoliberal political  
17 271 preoccupation with competition.<sup>33</sup> When young people's sense of self-worth is dependent on what  
18 272 they achieve in school, it can also lead to anxiety and depression.<sup>32</sup>

19  
20  
21 273 Another substantial change in Western societies over this time-period, and which we believe can  
22 274 have great significance, has been in technology use. The tech industry's strong influence on young  
23 275 people's behavior using deliberately manipulative and exploitive strategies<sup>48</sup> may be an important  
24 276 driver of the observed trends among young people in our data.<sup>11</sup> Evidence has shown that heavy  
25 277 users of technology, for example, are twice as likely as light users to be depressed or report lower  
26 278 levels of well-being.<sup>11</sup> These detrimental effects may be associated with an increase in the  
27 279 prevalence of loneliness seen after 2012<sup>28 49</sup> and reduced hours of sleep among adolescents.<sup>29 30</sup>  
28 280 Some have questioned the suggestion that increased time spent on social media is a leading cause of  
29 281 increasing mental stress among young people, with individual data revealing only a weak association  
30 282 between time use and mental health in a longitudinal study.<sup>50</sup> However, associations at the  
31 283 individual level may be different from the group-level associations we examine here; even non-users  
32 284 of technology may be impacted by the changes in social interaction caused by technology use.<sup>11</sup> The  
33 285 increased acceptance, integration and near-obligatory use of internet-based media technologies to  
34 286 access services and social networks in society increasingly either isolate non-users or force them to  
35 287 conform. Furthermore, as social norms move away from in-person social interaction, even  
36 288 individuals interested in in-person interactions find it increasingly difficult to find others to do so  
37 289 with. Social media is social, not just individual, and naturally possesses powerful network effects.<sup>27</sup>  
38 290 Thus, it becomes necessary to look further into the political, historical and cultural context in which  
39 291 these behavioral changes unfold.<sup>17 51</sup>

40  
41  
42 292 Among older segments of the population, we see no similar increase in mental health issues over the  
43 293 study period. In fact, our results highlight rather the opposite – a decrease in mental health related  
44 294 issues. Such trends have also been observed in other populations.<sup>14</sup> Older people in Norway benefit  
45 295 from good living conditions with financial security in a generous welfare state<sup>52</sup> and good prospects  
46 296 of a high life expectancy.<sup>53</sup> Older individuals may also benefit from emotional regulation and  
47 297 complex social decision-making, and thus be able to cope with the stress of technological  
48 298 developments in other ways than young people.<sup>14 54</sup>

49  
50  
51 299

### 52 300 *Strengths*

53  
54  
55 301 The HUNT Study collects data from a total population at approximately ten years intervals, enabling  
56 302 studies of health changes in the population over time.<sup>35 36</sup> The invitation/sampling of participants,

## Manuscript revision BMJOpen

1  
2  
3 303 and methods for measuring mental health, have been conducted using the same methods and  
4 304 instruments in all three surveys. Large sample sizes have ensured reliable estimates. Health trends in  
5 305 the county follow both national<sup>55</sup> and international western health trends closely.<sup>56</sup> The population  
6 306 is stable and relatively homogenous with a low net migration. As part of a national Nordic welfare  
7 307 state, the population recruited is part of a country with a universal public health service and a school  
8 308 system where almost everyone attends the same local schools.

309

310 *Limitations*

15 311 Our survey data covered approximately 78% of the total adolescent population and 70% to 54% of  
16 312 the total adult population (as the result of a decrease in participation from HUNT2 to HUNT3 among  
17 313 adults). Non-response analyzes for adult participants have shown that those who choose not to  
18 314 participate generally have a higher mortality rate, slightly higher prevalence of chronic illness, and  
19 315 lower socioeconomic position than participants.<sup>57</sup> This may have biased our findings so that  
20 316 unfavorable trends among adolescents are underestimated and favorable trends among adults are  
21 317 overestimated.

318

319 *Relevance*

27 320 The rapid and almost uncontrolled development in the information technology industry has taken  
28 321 place without notable political concern in Norway or other western countries, in line with  
29 322 dominating neoliberal political ideology.<sup>18 58</sup> This development is saturated with paradoxes. We have  
30 323 never had greater access to information, but have also never been so poorly informed. It has never  
31 324 been easier to contact friends or family, yet more people report being lonely and psychologically  
32 325 distressed. The consequences of these technological trends are becoming increasingly apparent. We  
33 326 are, of course, not required to abandon technology, however, it is imperative that the consequences  
34 327 of these technological developments are to be taken seriously and are reflected in both future  
35 328 political and research agendas. Importantly, there is an emerging discussion concerning why it is  
36 329 necessary to respond to commercial<sup>59</sup> and corporate determinants of health, reflecting in part a  
37 330 growing appreciation of their enormous power.<sup>60</sup>

41 331 Our results are in line with results suggesting increases in mental health issues observed among  
42 332 adolescents and young adults internationally<sup>8 9</sup> and, more specifically, in the USA.<sup>11</sup> Supporting  
43 333 research shows, additionally, that social media use has significant effects on mental health,  
44 334 particularly in young people.<sup>25</sup> The data on both are of great interest to public health policy. The  
45 335 undesirable trend has affected many young people and affected everyday life substantially for large  
46 336 groups in Norway. Based on earlier findings from the HUNT Study, there is reason to forecast that  
47 337 increasing mental health problems may contribute to an increasing incidence of work-related  
48 338 incapacity in Norway now and in the years to come.<sup>6 61</sup>

339

340 *Need for further research and need for action*

55 341 Our disturbing findings highlights the need for further research to find out if some of the increase in  
56 342 reporting of mental stress simply may be due to greater awareness of mental health or changes in  
57 343 reporting. It is, furthermore, necessary to investigate the broad range of potential driving factors  
58 344 underlying increased mental health problems in young people. The long term consequences will be  
59 345 important to follow, to see if the correlation between mental stress in adolescents and negative



1  
2  
3 346 outcomes in adulthood will be as expected based on previous studies.<sup>61</sup> Based on what is outlined in  
4 347 this paper, there is every reason to consider policy measures to protect youth and young adults  
5 348 against increasing mental health distress. A public health policy is needed that strengthens faith in  
6 349 the future, demonstrating our influence on living conditions and reduced pressure and stress on  
7 350 young people. Experience and evidence from population-based public health and relevant research,  
8 351 provides reason to believe that increased regulation of the tech industry, which has enjoyed  
9 352 relatively few restrictions for decades, will be important moving forward. Governments and  
10 353 individuals could challenge their role in defining the dominant narrative, setting the rules by which  
11 354 trade operates, commodifying knowledge and undermining political, social, and economic rights in  
12 355 our society.<sup>60</sup> Relevant measures could be, but are not limited to, for example an enforced age  
13 356 minimum for use of social media and online computer gaming, creating increased accountability for  
14 357 the content published by technology companies and their platforms, regulations to restrict addictive  
15 358 elements of different software, and taxation of the industry to obtain funding for relevant public  
16 359 health initiatives. However, of greatest concern is restructuring and regulating the entire economic  
17 360 business model on which many of these tech giants not only depend on for their enormously  
18 361 powerful profits but have also had a central role in developing for the deliberate manipulation and  
19 362 exploitation of its most vulnerable users. Such measures would undoubtedly increase in  
20 363 effectiveness through systematic international cooperation. In addition, the academic pressure  
21 364 following the dominant political ideology, is another issue that needs to be addressed.<sup>51</sup>  
22  
23  
24  
25

## 26 366 *Conclusion*

27  
28 367 The data from the HUNT Study in Norway indicate a strong and worrying increase in mental health  
29 368 symptoms among adolescents and young adults, and the opposite trend among the elderly. This  
30 369 trend is likely related to significant disruptions in the living conditions of young people in society and  
31 370 behavioral changes in adolescents and young adults driven by major socio-political trends, such as  
32 371 the growth of neoliberal policy, globalization and an expanding tech industry.<sup>21</sup> It is urgently  
33 372 important that health authorities now see the need to implement political measures to reverse the  
34 373 negative trend concerning young people.  
35  
36

37 374

## 39 375 **Acknowledgments**

40  
41 376 The Trøndelag Health Study (HUNT) is a collaboration between HUNT Research Centre (Faculty of  
42 377 Medicine and Health Sciences, NTNU, Norwegian University of Science and Technology), Nord-  
43 378 Trøndelag County Council, Central Norway Regional Health Authority, and the Norwegian Institute of  
44 379 Public Health.  
45  
46

47 380

## 49 381 **Contributorship statement**

50  
51 382 SK was the main author and contributed to the conception and design of the work, acquisition of  
52 383 data, interpretation of data, drafting and revising it critically for important intellectual content. DAW  
53 384 contributed to interpretation of data, drafting and revising the work critically for important  
54 385 intellectual content. MAK contributed to the conception and design, revising the work critically for  
55 386 important intellectual content, interpretation of data, and revising it critically for important  
56 387 intellectual content. VR contributed to the acquisition of data, analyses and interpretation of data,  
57 388 and revising the work critically for important intellectual content. KK contributed to acquisition of  
58 389 data, interpretation of data, drafting and revising the work critically for important intellectual  
59  
60

## Manuscript revision BMJOpen

1  
2  
3 390 content. JMI contributed to acquisition of data, interpretation of data, and revising the work  
4 391 critically for important intellectual content. OB contributed to acquisition of data, interpretation of  
5 392 data, and revising the work critically for important intellectual content. JMT contributed to  
6 393 interpretation of data, drafting and revising the work critically for important intellectual content. ERS  
7 394 contributed to the conception and design of the work, acquisition of data, analyses and  
8 395 interpretation of data, drafting and revising it critically for important intellectual content. All authors  
9 396 approved the final version to be published and are accountable for all aspects of the work. SK accepts  
10 397 full responsibility for the work and/or the conduct of the study, had access to the data, and  
11 398 controlled the decision to publish. The corresponding author attests that all listed authors meet  
12 399 authorship criteria and that no others meeting criteria have been omitted.

13  
14  
15  
16 400 The Corresponding Author has the right to grant on behalf of all authors and does grant on behalf of  
17 401 all authors, an exclusive license (or nonexclusive for government employees) on a worldwide basis to  
18 402 the BMJ Publishing Group Ltd to permit this article (if accepted) to be published in BMJ editions and  
19 403 any other BMJ PGL products and sublicences such use and exploit all subsidiary rights, as set out in  
20 404 our license.

### 21 405 Competing interests

22  
23 406 All authors have completed the Unified Competing Interest form (available on request from the  
24 407 corresponding author) and declare: no support from any organisation for the submitted work; no  
25 408 financial relationships with any organisations that might have an interest in the submitted work in  
26 409 the previous three years, no other relationships or activities that could appear to have influenced  
27 410 the submitted work.

### 28 411 Funding

29 412 The HUNT Study is publicly funded, and this paper have no external funding. The funding sources  
30 413 were not involved in the study design; analysis, and interpretation; writing of the report; or the  
31 414 decision to submit the article for publication. The researchers were independent from funders and  
32 415 all authors had full access to all of the data (including statistical reports and tables) in the study and  
33 416 take responsibility for the integrity of the data and the accuracy of the data analysis.

### 34 417 Data sharing statement

35 418 Data sharing: The data used is individual-based sensitive health data that can not be made available  
36 419 without violating the consent and Norwegian law. Data from the Trøndelag Health Study (HUNT) is  
37 420 available upon reasonable request to the HUNT data access committee ([hunt@medisin.ntnu.no](mailto:hunt@medisin.ntnu.no)).  
38 421 The HUNT data access information ([www.ntnu.edu/hunt/data](http://www.ntnu.edu/hunt/data)) describes in detail the policy about  
39 422 data availability.

40  
41  
42 423 Transparency: The lead author (SK) affirms that the manuscript is an honest, accurate, and  
43 424 transparent account of the study being reported; that no important aspects of the study have been  
44 425 omitted; and any discrepancies from the study as planned have been explained.

45 426

### 46 427 References

47 428

48  
49 429 1. Global, regional, and national incidence, prevalence, and years lived with disability for 301 acute  
50 430 and chronic diseases and injuries in 188 countries, 1990-2013: a systematic analysis for the

Manuscript revision BMJOpen

- 431 Global Burden of Disease Study 2013. *Lancet* 2015;386(9995):743-800. doi: 10.1016/s0140-  
432 6736(15)60692-4 [published Online First: 2015/06/13]
- 433 2. Patel V, Flisher AJ, Hetrick S, et al. Mental health of young people: a global public-health  
434 challenge. *Lancet* 2007;369(9569):1302-13. doi: 10.1016/s0140-6736(07)60368-7 [published  
435 Online First: 2007/04/17]
- 436 3. Lozano R, Naghavi M, Foreman K, et al. Global and regional mortality from 235 causes of death for  
437 20 age groups in 1990 and 2010: a systematic analysis for the Global Burden of Disease  
438 Study 2010. *Lancet* 2012;380(9859):2095-128. doi: 10.1016/s0140-6736(12)61728-0  
439 [published Online First: 2012/12/19]
- 440 4. Murray CJ, Vos T, Lozano R, et al. Disability-adjusted life years (DALYs) for 291 diseases and  
441 injuries in 21 regions, 1990-2010: a systematic analysis for the Global Burden of Disease  
442 Study 2010. *Lancet* 2012;380(9859):2197-223. doi: 10.1016/s0140-6736(12)61689-4  
443 [published Online First: 2012/12/19]
- 444 5. Mathers CD, Loncar D. Projections of Global Mortality and Burden of Disease from 2002 to 2030.  
445 *PLOS Medicine* 2006;3(11):e442. doi: 10.1371/journal.pmed.0030442
- 446 6. Tollånes MC, Knudsen AK, Vollset SE, et al. Disease burden in Norway in 2016. *Tidsskr Nor*  
447 *Laegeforen* 2018;138(15) doi: 10.4045/tidsskr.18.0274 [published Online First: 2018/10/03]
- 448 7. Knudsen AK, Øverland S, Hotopf M, et al. Lost working years due to mental disorders: an analysis  
449 of the Norwegian disability pension registry. *PLoS One* 2012;7(8):e42567. doi:  
450 10.1371/journal.pone.0042567 [published Online First: 2012/08/21]
- 451 8. Bor W, Dean AJ, Najman J, et al. Are child and adolescent mental health problems increasing in  
452 the 21st century? A systematic review. *Aust N Z J Psychiatry* 2014;48(7):606-16. doi:  
453 10.1177/0004867414533834 [published Online First: 2014/05/16]
- 454 9. Twenge JM, Farley E. Not all screen time is created equal: associations with mental health vary by  
455 activity and gender. *Soc Psychiatry Psychiatr Epidemiol* 2021;56(2):207-17. doi:  
456 10.1007/s00127-020-01906-9 [published Online First: 2020/08/04]
- 457 10. Myhr A, Anthun KS, Lillefjell M, et al. Trends in Socioeconomic Inequalities in Norwegian  
458 Adolescents' Mental Health From 2014 to 2018: A Repeated Cross-Sectional Study. *Front*  
459 *Psychol* 2020;11:1472. doi: 10.3389/fpsyg.2020.01472 [published Online First: 2020/08/01]
- 460 11. Twenge JM. Why increases in adolescent depression may be linked to the technological  
461 environment. *Curr Opin Psychol* 2020;32:89-94. doi: 10.1016/j.copsyc.2019.06.036  
462 [published Online First: 2019/08/16]
- 463 12. Twenge JM, Cooper AB, Joiner TE, et al. Age, period, and cohort trends in mood disorder  
464 indicators and suicide-related outcomes in a nationally representative dataset, 2005-2017. *J*  
465 *Abnorm Psychol* 2019;128(3):185-99. doi: 10.1037/abn0000410 [published Online First:  
466 2019/03/15]
- 467 13. Keyes KM, Gary D, O'Malley PM, et al. Recent increases in depressive symptoms among US  
468 adolescents: trends from 1991 to 2018. *Soc Psychiatry Psychiatr Epidemiol* 2019;54(8):987-  
469 96. doi: 10.1007/s00127-019-01697-8 [published Online First: 2019/04/01]
- 470 14. Thomas ML, Kaufmann CN, Palmer BW, et al. Paradoxical Trend for Improvement in Mental  
471 Health With Aging: A Community-Based Study of 1,546 Adults Aged 21-100 Years. *J Clin*  
472 *Psychiatry* 2016;77(8):e1019-25. doi: 10.4088/JCP.16m10671 [published Online First:  
473 2016/08/26]
- 474 15. Zivin K, Pirraglia PA, McCammon RJ, et al. Trends in depressive symptom burden among older  
475 adults in the United States from 1998 to 2008. *J Gen Intern Med* 2013;28(12):1611-9. doi:  
476 10.1007/s11606-013-2533-y [published Online First: 2013/07/10]
- 477 16. Braveman P, Gottlieb L. The social determinants of health: it's time to consider the causes of the  
478 causes. *Public Health Rep* 2014;129 Suppl 2(Suppl 2):19-31. doi:  
479 10.1177/00333549141291s206 [published Online First: 2014/01/05]
- 480 17. Rose G. Sick individuals and sick populations. *Int J Epidemiol* 2001;30(3):427-32; discussion 33-4.  
481 doi: 10.1093/ije/30.3.427 [published Online First: 2001/06/21]

## Manuscript revision BMJOpen

- 1  
2  
3 482 18. Ostry JD, Loungani P, Furceri D. Neoliberalism: oversold. *Finance & development* 2016;53(2):38-  
4 483 41.
- 5 484 19. Harari YN. 21 lessons for the 21st century. London: Vintage Books 2019.
- 6 485 20. Zuboff S. The age of surveillance capitalism : the fight for the future at the new frontier of power.  
7 486 London,New York: Profile Books PublicAffairs 2019.
- 8 487 21. Harari YN. Homo Deus: A brief history of tomorrow: Random House 2016.
- 9 488 22. Harris T. How technology hijacks people’s minds—from a magician and Google’s design ethicist.  
10 489 *Medium Magazine* 2016
- 11 490 23. Creativity C. Top 9 trends of global culture during the last 15 years *Culture & Creativity*; 2021  
12 491 [Available from: [https://www.culturepartnership.eu/en/article/top-9-trends-of-the-last-](https://www.culturepartnership.eu/en/article/top-9-trends-of-the-last-decade)  
13 492 [decade](https://www.culturepartnership.eu/en/article/top-9-trends-of-the-last-decade). Accessed 26.02.2022.
- 14 493 24. Lin LY, Sidani JE, Shensa A, et al. ASSOCIATION BETWEEN SOCIAL MEDIA USE AND DEPRESSION  
15 494 AMONG U.S. YOUNG ADULTS. *Depress Anxiety* 2016;33(4):323-31. doi: 10.1002/da.22466  
16 495 [published Online First: 2016/01/20]
- 17 496 25. Keles B, McCrae N, Grealish A. A systematic review: the influence of social media on depression,  
18 497 anxiety and psychological distress in adolescents. *International Journal of Adolescence and*  
19 498 *Youth* 2020;25(1):79-93. doi: 10.1080/02673843.2019.1590851
- 20 499 26. Korpås JA. Screen time associated to mental health in adolescents: Knowledge from a population  
21 500 based study. Norwegian University of Science and Technology, 2020.
- 22 501 27. Dwyer RJ, Kushlev K, Dunn EW. Smartphone use undermines enjoyment of face-to-face social  
23 502 interactions. *Journal of experimental social psychology* 2018;78:233-39. doi:  
24 503 10.1016/j.jesp.2017.10.007
- 25 504 28. Kim J-H. Longitudinal Associations Among Psychological Issues and Problematic Use of  
26 505 Smartphones: A Two-Wave Cross-Lagged Study. *Journal of media psychology*  
27 506 2019;31(3):117-27. doi: 10.1027/1864-1105/a000234
- 28 507 29. Keyes KM, Maslowsky J, Hamilton A, et al. The great sleep recession: changes in sleep duration  
29 508 among US adolescents, 1991-2012. *Pediatrics* 2015;135(3):460-8. doi: 10.1542/peds.2014-  
30 509 2707 [published Online First: 2015/02/18]
- 31 510 30. Twenge JM, Krizan Z, Hisler G. Decreases in self-reported sleep duration among U.S. adolescents  
32 511 2009-2015 and association with new media screen time. *Sleep Med* 2017;39:47-53. doi:  
33 512 10.1016/j.sleep.2017.08.013 [published Online First: 2017/11/22]
- 34 513 31. Hestetun I, Svendsen MV, Oellingrath IM. Sleep problems and mental health among young  
35 514 Norwegian adolescents. *Nord J Psychiatry* 2018;72(8):578-85. doi:  
36 515 10.1080/08039488.2018.1499043 [published Online First: 2018/10/10]
- 37 516 32. Pascoe MC, Hetrick SE, Parker AG. The impact of stress on students in secondary school and  
38 517 higher education. *International Journal of Adolescence and Youth* 2020;25(1):104-12. doi:  
39 518 10.1080/02673843.2019.1596823
- 40 519 33. Cosma A, Stevens G, Martin G, et al. Cross-National Time Trends in Adolescent Mental Well-  
41 520 Being From 2002 to 2018 and the Explanatory Role of Schoolwork Pressure. *J Adolesc Health*  
42 521 2020;66(6s):S50-s58. doi: 10.1016/j.jadohealth.2020.02.010 [published Online First:  
43 522 2020/05/25]
- 44 523 34. Hellevik O, Hellevik T. Hvorfor ser færre unge lyst på livet? Utviklingen for opplevd livskvalitet  
45 524 blant ungdom og yngre voksne i Norge. *Nordisk Tidsskrift for Ungdomsforskning* 2021;2:104-  
46 525 28. doi: 10.18261/issn.2535-8162-2021-02-02
- 47 526 35. Krokstad S, Langhammer A, Hveem K, et al. Cohort Profile: the HUNT Study, Norway. *Int J*  
48 527 *Epidemiol* 2013;42(4):968-77. doi: 10.1093/ije/dys095 [published Online First: 2012/08/11]
- 49 528 36. Holmen TL, Bratberg G, Krokstad S, et al. Cohort profile of the Young-HUNT Study, Norway: a  
50 529 population-based study of adolescents. *Int J Epidemiol* 2014;43(2):536-44. doi:  
51 530 10.1093/ije/dys232 [published Online First: 2013/02/06]
- 52  
53  
54  
55  
56  
57  
58  
59  
60

Manuscript revision BMJOpen

- 1  
2  
3 531 37. Schmalbach B, Zenger M, Tibubos AN, et al. Psychometric Properties of Two Brief Versions of the  
4 532 Hopkins Symptom Checklist: HSCL-5 and HSCL-10. *Assessment* 2019;1073191119860910.  
5 533 doi: 10.1177/1073191119860910 [published Online First: 2019/07/06]  
6 534 38. Strand BH, Dalgard OS, Tambs K, et al. Measuring the mental health status of the Norwegian  
7 535 population: a comparison of the instruments SCL-25, SCL-10, SCL-5 and MHI-5 (SF-36). *Nord J*  
8 536 *Psychiatry* 2003;57(2):113-8. doi: 10.1080/08039480310000932 [published Online First:  
9 537 2003/05/15]  
10 538 39. Bjelland I, Dahl AA, Haug TT, et al. The validity of the Hospital Anxiety and Depression Scale. An  
11 539 updated literature review. *J Psychosom Res* 2002;52(2):69-77. doi: 10.1016/s0022-  
12 540 3999(01)00296-3 [published Online First: 2002/02/08]  
13 541 40. Stata Statistical Software: Release 16. [program]. College Station, TX: StataCorp LLC, 2019.  
14 542 41. Hartz I, Skurtveit S, Steffenak AKM, et al. Psychotropic drug use among 0–17 year olds during  
15 543 2004–2014: a nationwide prescription database study. *BMC Psychiatry* 2016;16(1):12. doi:  
16 544 10.1186/s12888-016-0716-x  
17 545 42. Wæhre A, Schorkopf M. Gender variance, medical treatment and our responsibility. *Tidsskr Nor*  
18 546 *Laegeforen* 2019;139(7) doi: 10.4045/tidsskr.19.0178 [published Online First: 2019/04/11]  
19 547 43. Furu K, Hjellevik V, Hartz I, et al. Legemiddelbruk hos barn og unge i Norge 2008-2017. Oslo:  
20 548 Folkehelseinstituttet, 2018.  
21 549 44. Kaltenbrunner Bernitz B, Grees N, Jakobsson Randers M, et al. Young adults on disability benefits  
22 550 in 7 countries. *Scand J Public Health* 2013;41(12 Suppl):3-26. doi:  
23 551 10.1177/1403494813496931 [published Online First: 2013/10/18]  
24 552 45. Mercado MC, Holland K, Leemis RW, et al. Trends in Emergency Department Visits for Nonfatal  
25 553 Self-inflicted Injuries Among Youth Aged 10 to 24 Years in the United States, 2001-2015.  
26 554 *Jama* 2017;318(19):1931-33. doi: 10.1001/jama.2017.13317 [published Online First:  
27 555 2017/11/23]  
28 556 46. Plemmons G, Hall M, Douppnik S, et al. Hospitalization for Suicide Ideation or Attempt: 2008-  
29 557 2015. *Pediatrics* 2018;141(6) doi: 10.1542/peds.2017-2426 [published Online First:  
30 558 2018/05/18]  
31 559 47. Strand BH, Steingrimsdóttir Ó A, Grøholt EK, et al. Trends in educational inequalities in cause  
32 560 specific mortality in Norway from 1960 to 2010: a turning point for educational inequalities  
33 561 in cause specific mortality of Norwegian men after the millennium? *BMC Public Health*  
34 562 2014;14:1208. doi: 10.1186/1471-2458-14-1208 [published Online First: 2014/11/25]  
35 563 48. Thompson N. Tristan Harris: Tech is 'downgrading humans.' it's time to fight back. 2019. *Wired*  
36 564 [https://www.wired.com/story/tristan-harris-tech-is-downgrading-humans-time-to-fight-](https://www.wired.com/story/tristan-harris-tech-is-downgrading-humans-time-to-fight-back/)  
37 565 [back/](https://www.wired.com/story/tristan-harris-tech-is-downgrading-humans-time-to-fight-back/). Accessed 26.02.2022.  
38 566 49. Twenge JM, Campbell WK. Media Use Is Linked to Lower Psychological Well-Being: Evidence  
39 567 from Three Datasets. *Psychiatr Q* 2019;90(2):311-31. doi: 10.1007/s11126-019-09630-7  
40 568 [published Online First: 2019/03/13]  
41 569 50. Coyne SM, Rogers AA, Zurcher JD, et al. Does time spent using social media impact mental  
42 570 health?: An eight year longitudinal study. *Computers in human behavior* 2020;104:106160.  
43 571 doi: 10.1016/j.chb.2019.106160  
44 572 51. Verhaeghe P. What about me? The struggle for identity in a market-based society. London:  
45 573 Scribe Publications Pty Ltd 2014.  
46 574 52. Thompson S, Cylus J, Evenovits T. Can people afford to pay for health care? New evidence on  
47 575 financial protection in Europe. Copenhagen, 2019.  
48 576 53. Storeng SH, Krokstad S, Westin S, et al. Decennial trends and inequalities in healthy life  
49 577 expectancy: The HUNT Study, Norway. *Scand J Public Health* 2018;46(1):124-31. doi:  
50 578 10.1177/1403494817695911 [published Online First: 2017/12/02]  
51 579 54. Worthy DA, Gorlick MA, Pacheco JL, et al. With age comes wisdom: decision making in younger  
52 580 and older adults. *Psychol Sci* 2011;22(11):1375-80. doi: 10.1177/0956797611420301  
53 581 [published Online First: 2011/10/01]

## Manuscript revision BMJOpen

- 1  
2  
3 582 55. Krokstad S, Westin S. Disability in society-medical and non-medical determinants for disability  
4 583 pension in a Norwegian total county population study. *Soc Sci Med* 2004;58(10):1837-48.  
5 584 doi: 10.1016/s0277-9536(03)00409-x [published Online First: 2004/03/17]  
6 585 56. Trends in adult body-mass index in 200 countries from 1975 to 2014: a pooled analysis of 1698  
7 586 population-based measurement studies with 19·2 million participants. *Lancet*  
8 587 2016;387(10026):1377-96. doi: 10.1016/s0140-6736(16)30054-x [published Online First:  
9 588 2016/04/27]  
10 589 57. Langhammer A, Krokstad S, Romundstad P, et al. The HUNT study: participation is associated  
11 590 with survival and depends on socioeconomic status, diseases and symptoms. *BMC Med Res*  
12 591 *Methodol* 2012;12:143. doi: 10.1186/1471-2288-12-143 [published Online First: 2012/09/18]  
13 592 58. Weiss D. Round hole, square peg: a discourse analysis of social inequalities and the political  
14 593 legitimization of health technology in Norway. *BMC Public Health* 2019;19(1):1691. doi:  
15 594 10.1186/s12889-019-8023-3 [published Online First: 2019/12/18]  
16 595 59. Kickbusch I. Addressing the interface of the political and commercial determinants of health.  
17 596 *Health Promot Int* 2012;27(4):427-8. doi: 10.1093/heapro/das057 [published Online First:  
18 597 2012/11/13]  
19 598 60. McKee M, Stuckler D. Revisiting the Corporate and Commercial Determinants of Health. *Am J*  
20 599 *Public Health* 2018;108(9):1167-70. doi: 10.2105/ajph.2018.304510 [published Online First:  
21 600 2018/07/20]  
22 601 61. Pape K, Bjørngaard JH, Holmen TL, et al. The welfare burden of adolescent anxiety and  
23 602 depression: a prospective study of 7500 young Norwegians and their families: the HUNT  
24 603 study. *BMJ Open* 2012;2(6) doi: 10.1136/bmjopen-2012-001942 [published Online First:  
25 604 2012/11/13]  
26  
27  
28  
29  
30 605  
31  
32  
33  
34  
35  
36  
37  
38  
39  
40  
41  
42  
43  
44  
45  
46  
47  
48  
49  
50  
51  
52  
53  
54  
55  
56  
57  
58  
59  
60

# HUNT

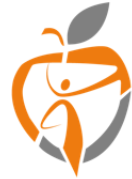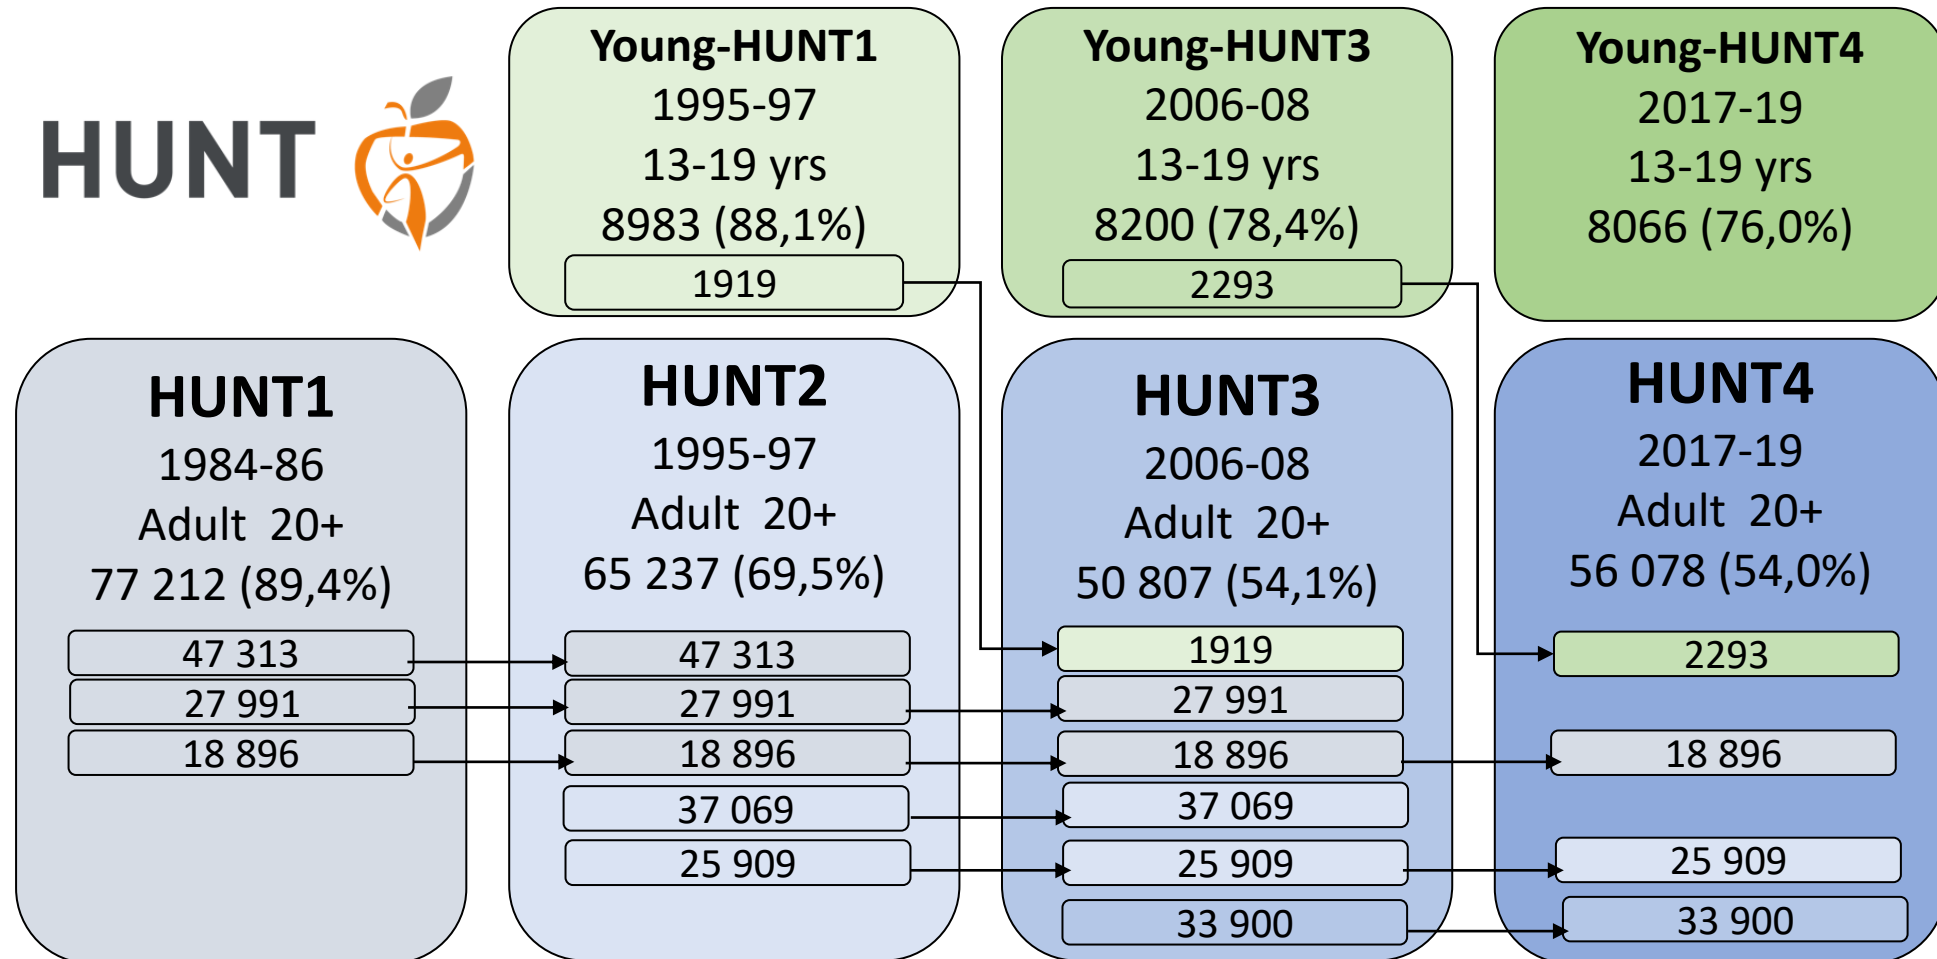

1  
2  
3  
4  
5  
6  
7  
8  
9  
10  
11  
12  
13  
14  
15  
16  
17  
18  
19  
20  
21  
22  
23  
24  
25  
26  
27  
28  
29  
30  
31  
32  
33  
34  
35  
36  
37  
38  
39  
40  
41

1  
2  
3  
4  
5  
6  
7  
8  
9  
10  
11  
12  
13  
14  
15  
16  
17  
18  
19  
20  
21  
22  
23  
24  
25  
26  
27  
28  
29  
30  
31  
32  
33  
34  
35  
36  
37  
38  
39  
40  
41

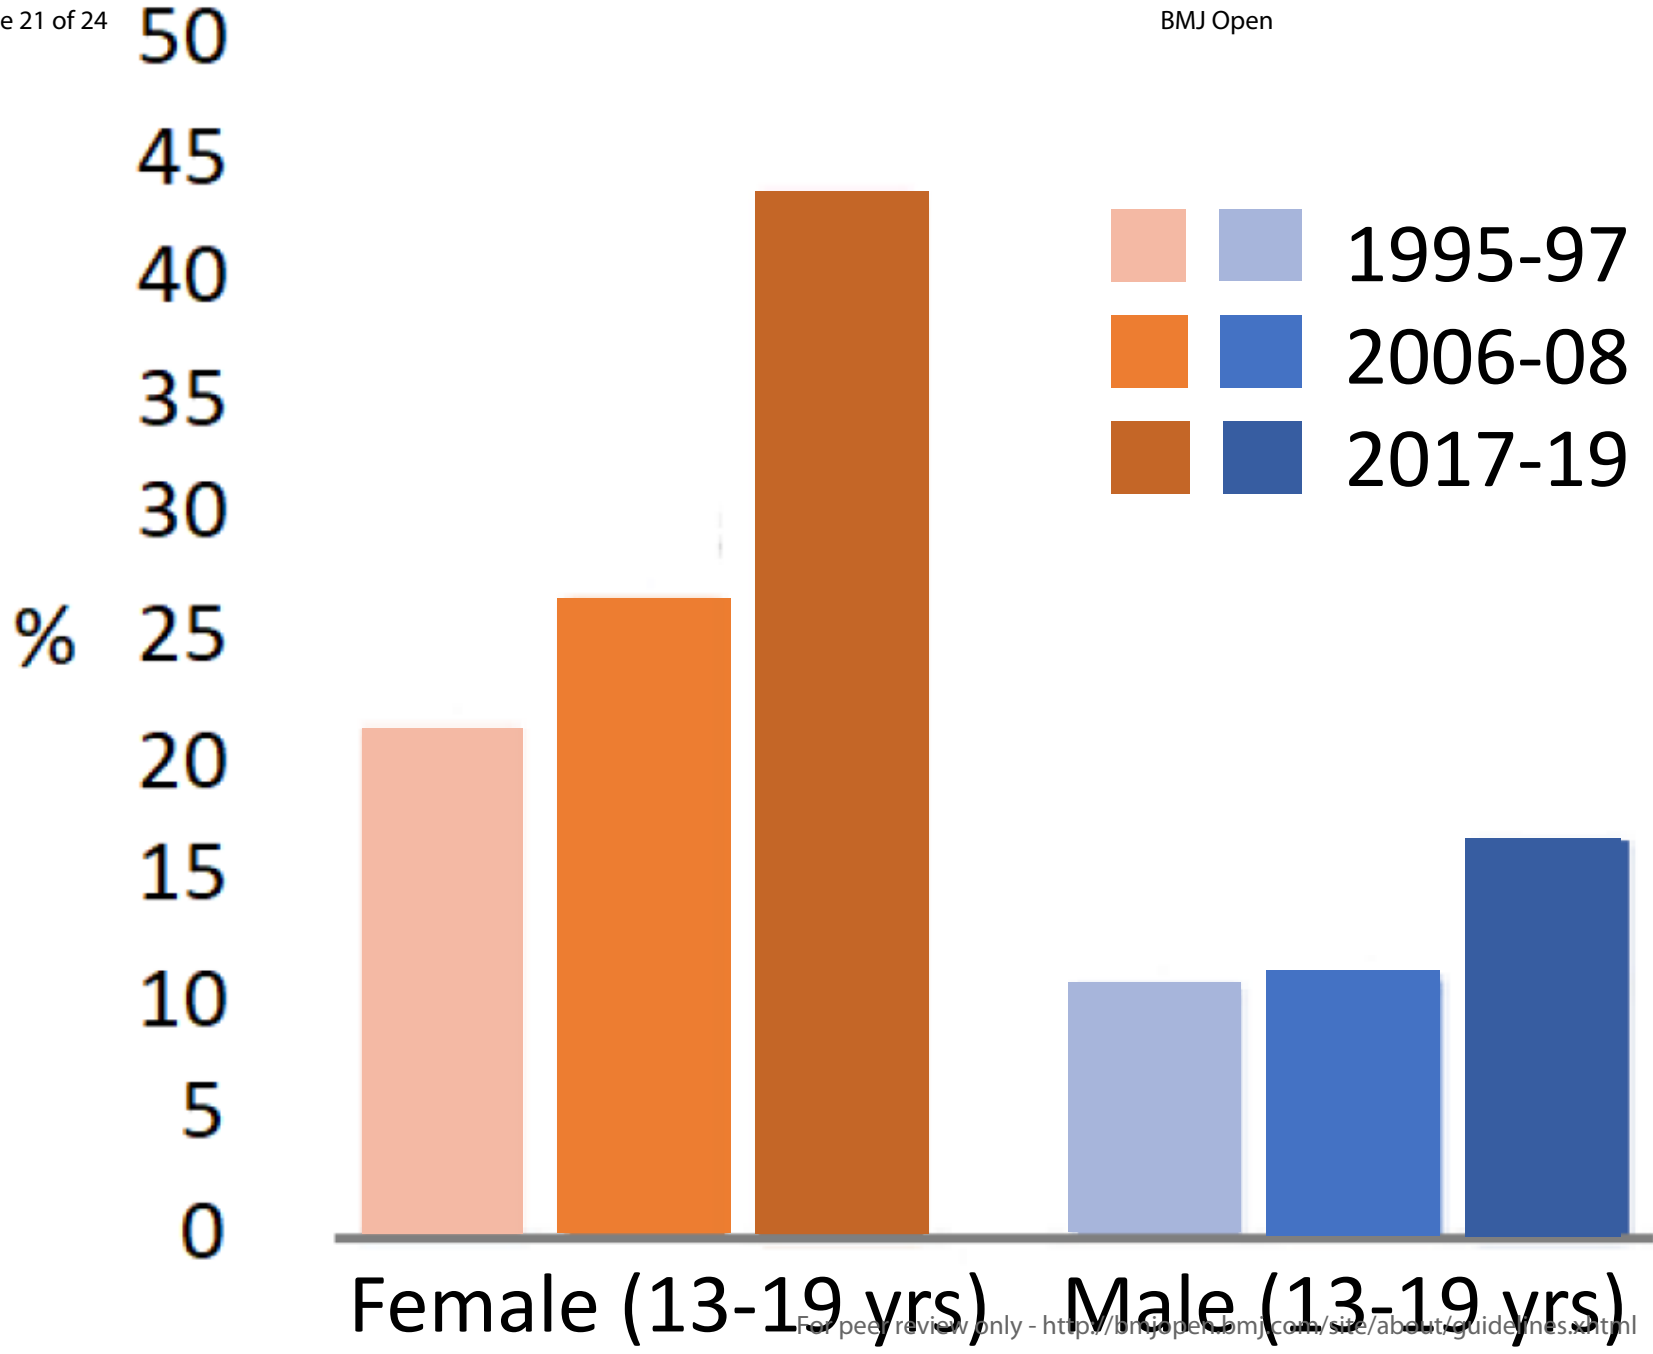

Female (13-19 yrs) Male (13-19 yrs)



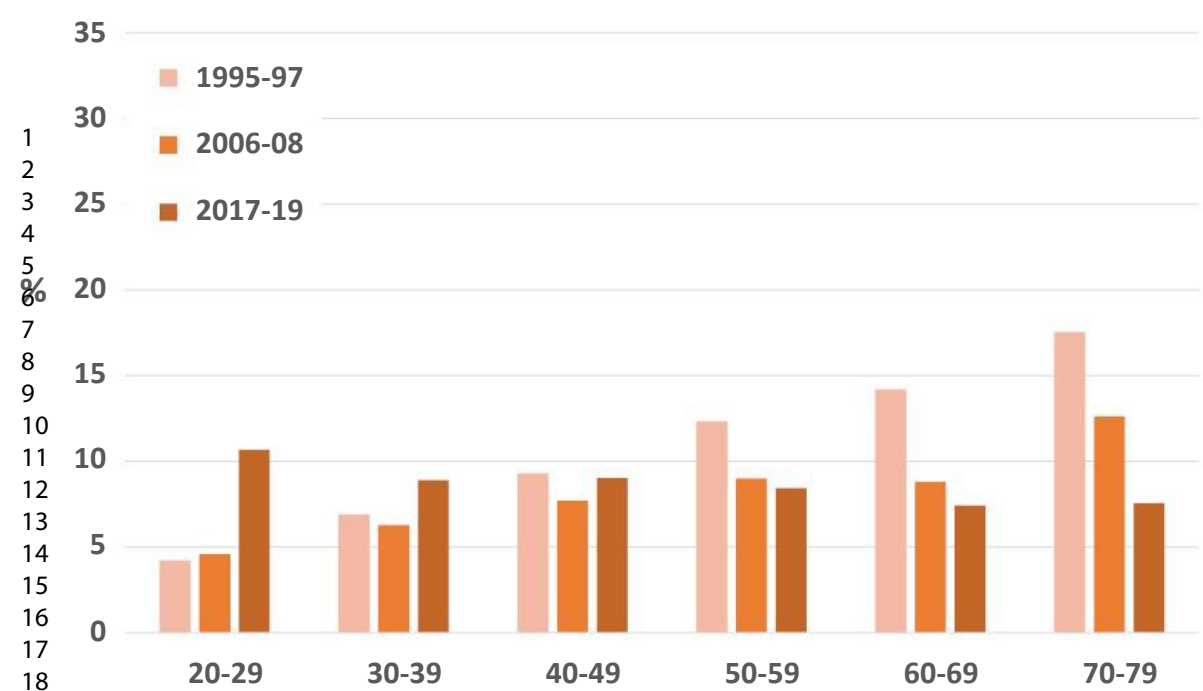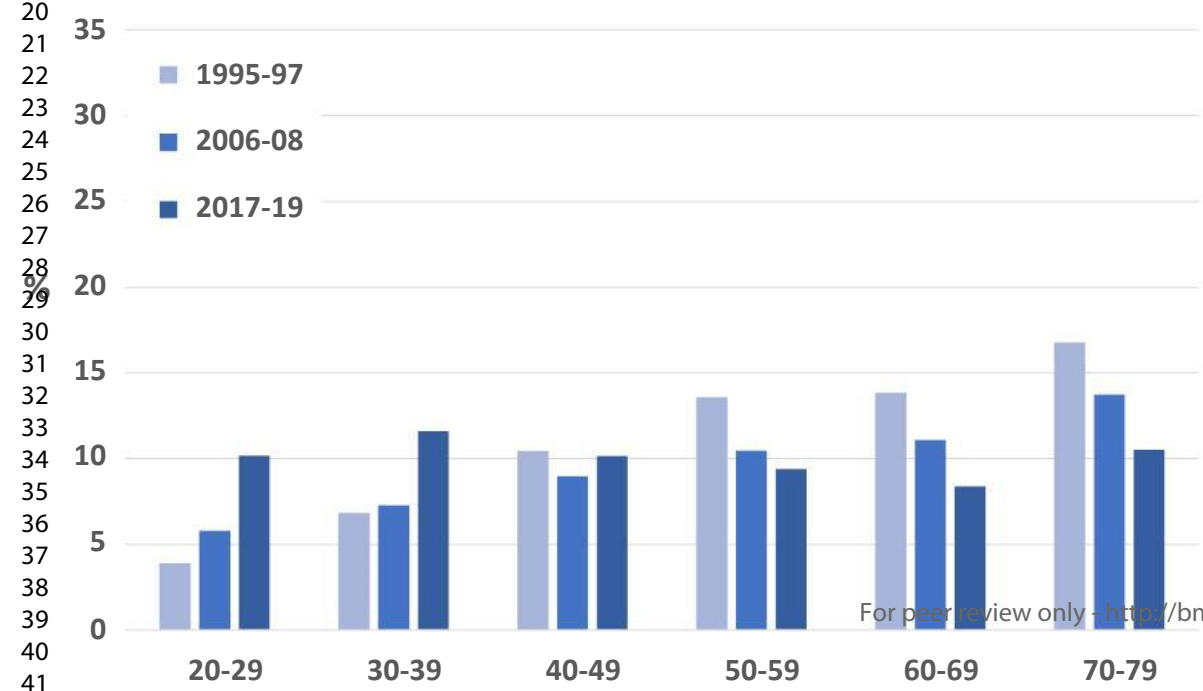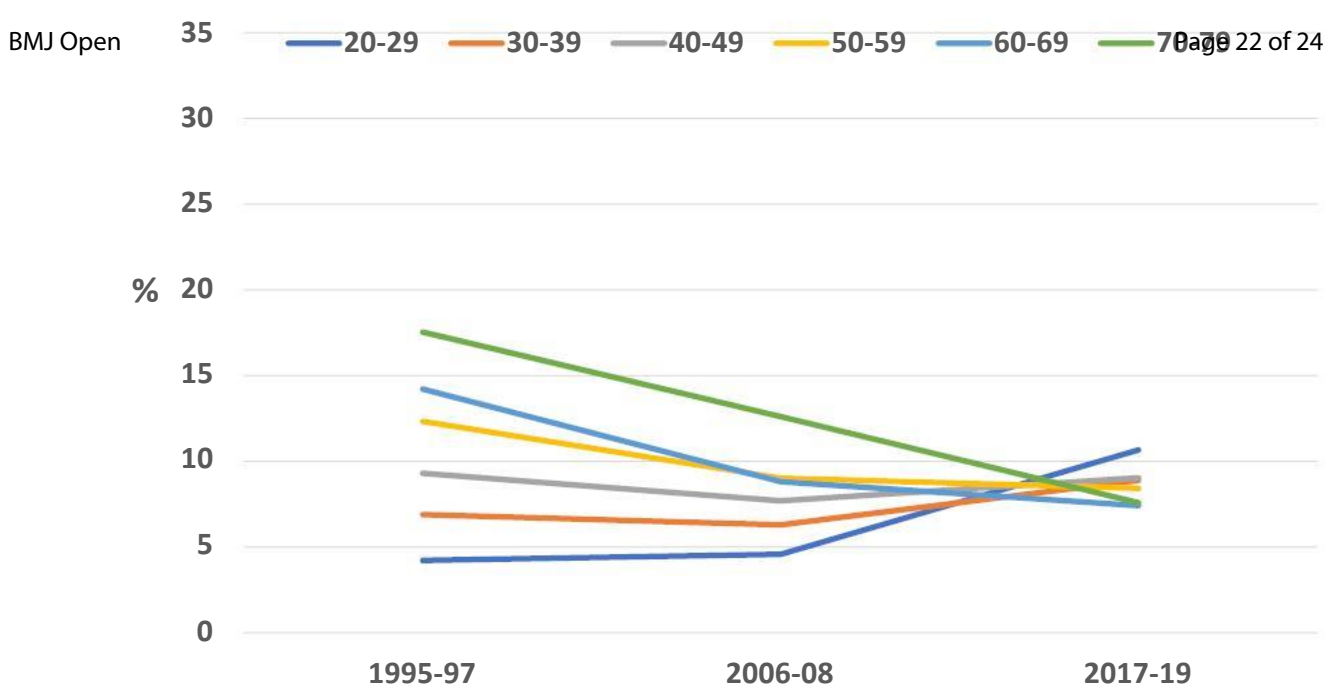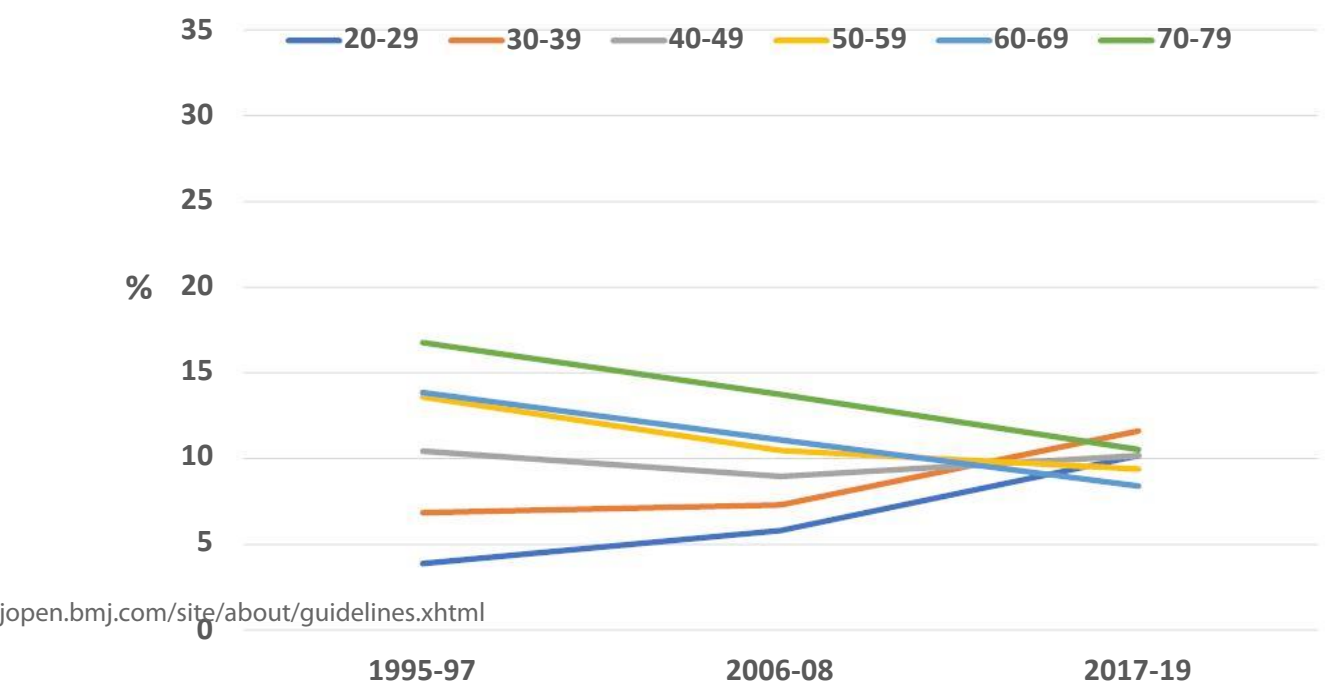

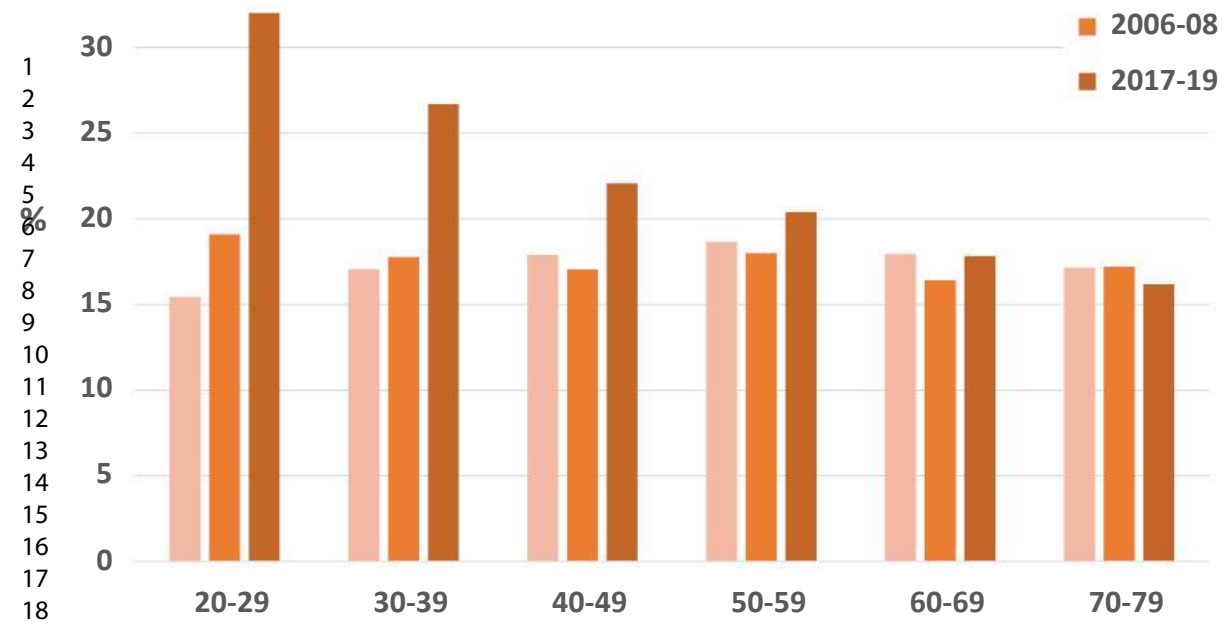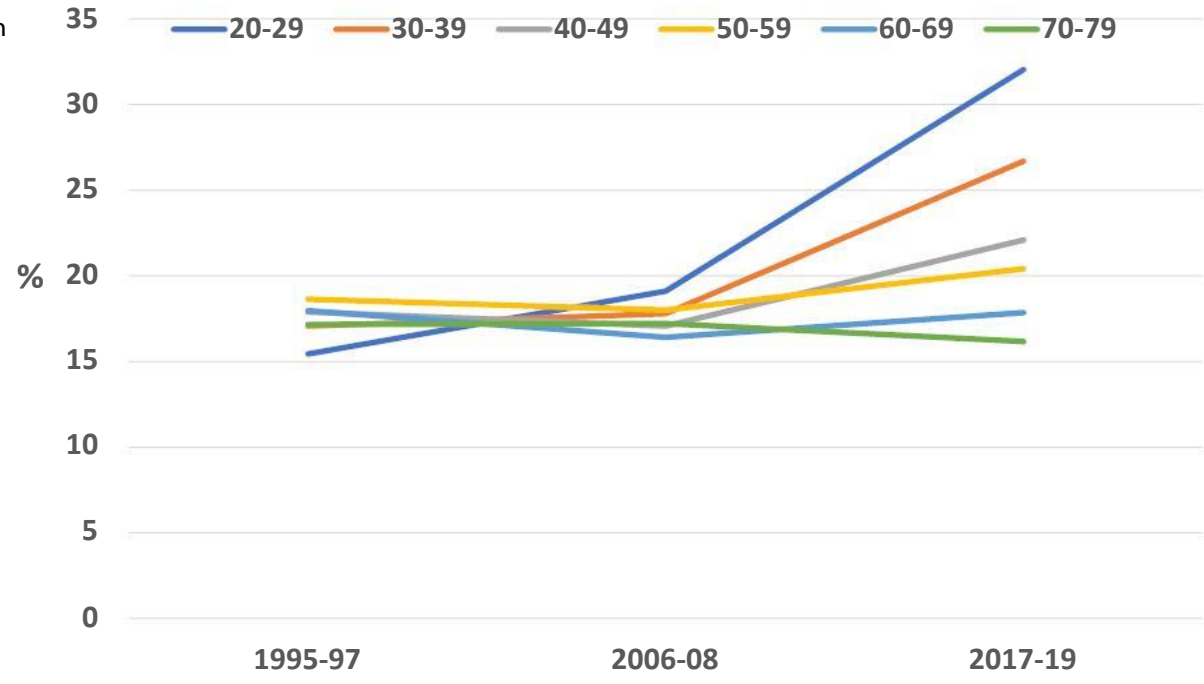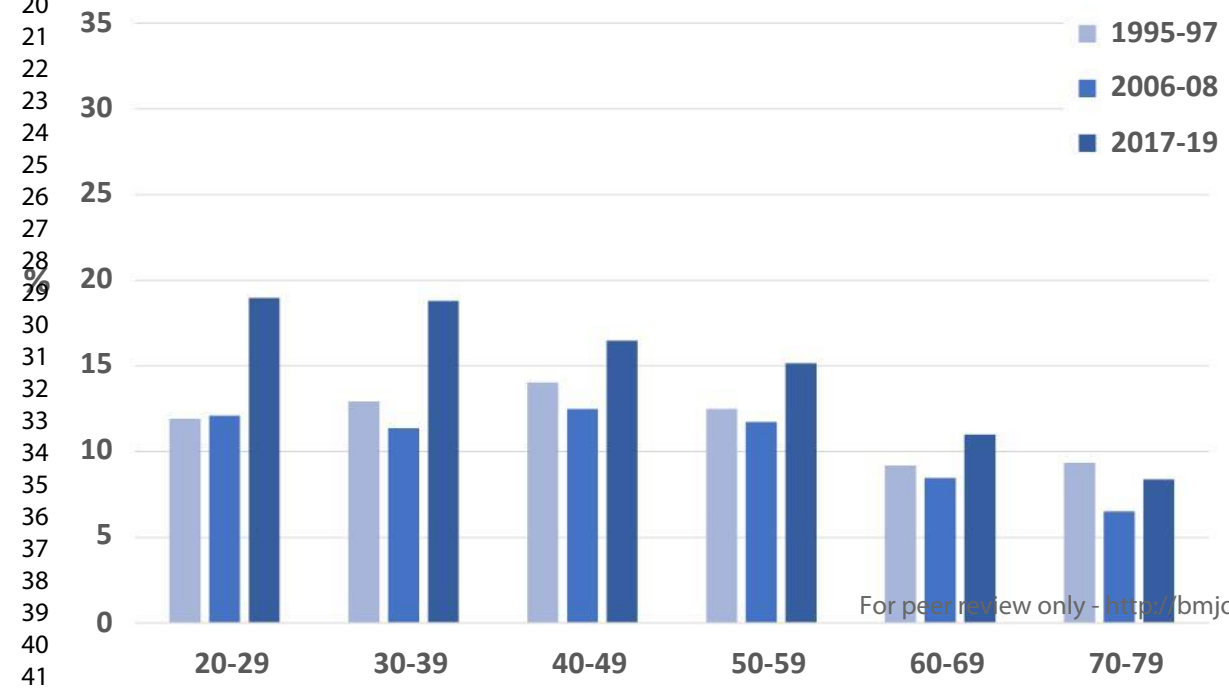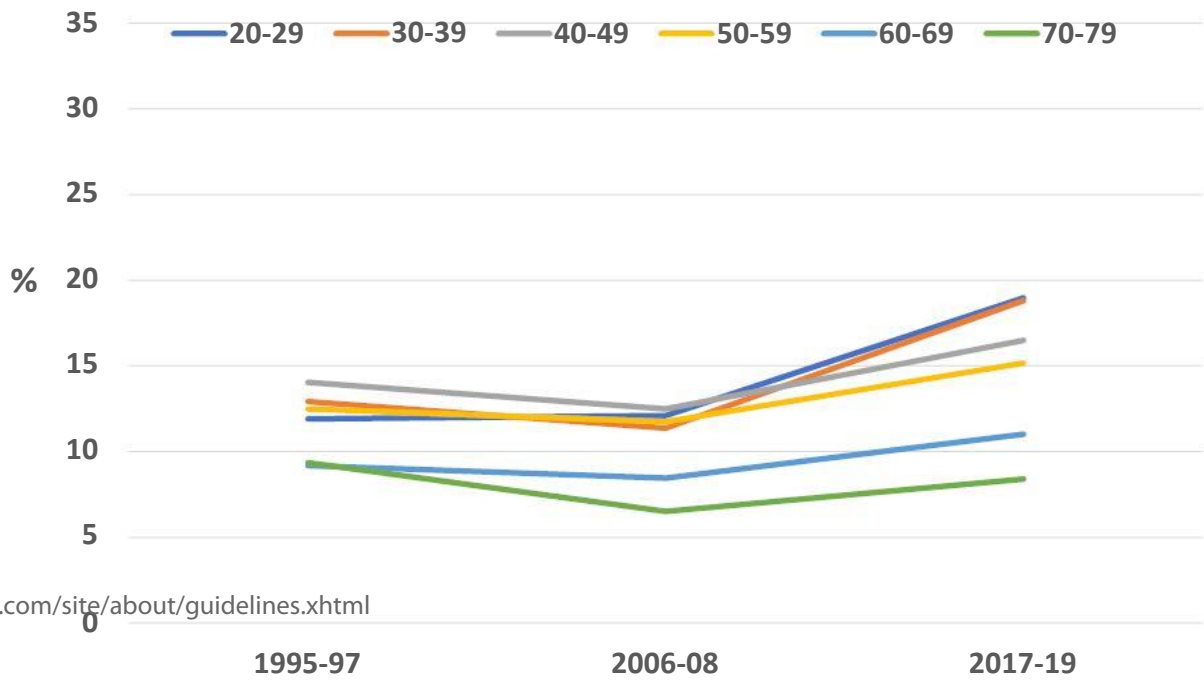

Appendix table 1

Appendix table 1. Prevalence (%) and 95 percent confidence interval (95% CI) for symptoms of poor mental health by age group and sex.

|                 |       | HUNT2      |               | HUNT3         |               | HUNT4         |               | P-value for trend |       |
|-----------------|-------|------------|---------------|---------------|---------------|---------------|---------------|-------------------|-------|
|                 |       | Prevalence | 95% CI        | Prevalence    | 95% CI        | Prevalence    | 95% CI        |                   |       |
| HADS depression |       |            |               |               |               |               |               |                   |       |
| Women           | 20-29 | 4.2        | (3.7 - 4.8)   | 4.6           | (3.7 - 5.7)   | 10.7          | (9.5 - 12.0)  | 0.000             |       |
|                 | 30-39 | 6.9        | (6.3 - 7.6)   | 6.3           | (5.5 - 7.2)   | 8.9           | (7.9 - 10.1)  | 0.004             |       |
|                 | 40-49 | 9.3        | (8.6 - 10.0)  | 7.7           | (6.9 - 8.5)   | 9.0           | (8.2 - 10.0)  | 0.377             |       |
|                 | 50-59 | 12.3       | (11.5 - 13.3) | 9.0           | (8.3 - 9.9)   | 8.4           | (7.7 - 9.3)   | 0.000             |       |
|                 | 60-69 | 14.2       | (13.2 - 15.3) | 8.8           | (8.0 - 9.7)   | 7.4           | (6.7 - 8.2)   | 0.000             |       |
| Men             | 70-79 | 17.5       | (16.3 - 18.9) | 12.6          | (11.4 - 14.0) | 7.6           | (6.8 - 8.5)   | 0.000             |       |
|                 | 20-29 | 3.9        | (3.3 - 4.5)   | 5.8           | (4.5 - 7.4)   | 10.2          | (8.7 - 11.9)  | 0.000             |       |
|                 | 30-39 | 6.9        | (6.2 - 7.6)   | 7.3           | (6.2 - 8.6)   | 11.6          | (10.2 - 13.2) | 0.000             |       |
|                 | 40-49 | 10.4       | (9.7 - 11.2)  | 9.0           | (8.0 - 10.0)  | 10.2          | (9.0 - 11.4)  | 0.358             |       |
|                 | 50-59 | 13.6       | (12.7 - 14.6) | 10.5          | (9.6 - 11.4)  | 9.4           | (8.5 - 10.4)  | 0.000             |       |
| HADS anxiety    | 60-69 | 13.9       | (12.8 - 15.0) | 11.1          | (10.2 - 12.1) | 8.4           | (7.6 - 9.3)   | 0.000             |       |
|                 | 70-79 | 16.8       | (15.4 - 18.2) | 13.7          | (12.4 - 15.2) | 10.5          | (9.5 - 11.6)  | 0.000             |       |
|                 | Women | 20-29      | 15.5          | (14.4 - 16.5) | 19.1          | (17.4 - 21.0) | 32.0          | (30.1 - 33.9)     | 0.000 |
|                 |       | 30-39      | 17.1          | (16.1 - 18.1) | 17.8          | (16.5 - 19.2) | 26.7          | (25.1 - 28.4)     | 0.000 |
|                 |       | 40-49      | 17.9          | (17.0 - 18.9) | 17.1          | (16.0 - 18.2) | 22.1          | (20.8 - 23.4)     | 0.000 |
| 50-59           |       | 18.6       | (17.5 - 19.8) | 18.0          | (17.0 - 19.1) | 20.4          | (19.3 - 21.6) | 0.028             |       |
| 60-69           |       | 18.0       | (16.7 - 19.3) | 16.4          | (15.4 - 17.6) | 17.9          | (16.8 - 19.0) | 0.896             |       |
| Men             | 70-79 | 17.2       | (15.7 - 18.8) | 17.2          | (15.8 - 18.8) | 16.2          | (15.0 - 17.4) | 0.290             |       |
|                 | 20-29 | 11.9       | (10.9 - 13.0) | 12.0          | (10.2 - 14.2) | 19.0          | (17.0 - 21.2) | 0.000             |       |
|                 | 30-39 | 12.9       | (12.0 - 13.9) | 11.4          | (10.0 - 12.9) | 18.8          | (17.0 - 20.7) | 0.000             |       |
|                 | 40-49 | 14.0       | (13.2 - 15.0) | 12.5          | (11.4 - 13.7) | 16.5          | (15.1 - 18.0) | 0.030             |       |
|                 | 50-59 | 12.5       | (11.6 - 13.5) | 11.7          | (10.8 - 12.7) | 15.2          | (14.0 - 16.4) | 0.001             |       |
| 60-69           |       | 9.2        | (8.3 - 10.2)  | 8.5           | (7.6 - 9.4)   | 11.0          | (10.1 - 12.0) | 0.004             |       |
|                 | 70-79 | 9.4        | (8.2 - 10.6)  | 6.5           | (5.6 - 7.6)   | 8.4           | (7.5 - 9.4)   | 0.325             |       |

STROBE Statement—Checklist of items that should be included in reports of *cross-sectional studies*

The following recommendations were followed if applicable for the manuscript: Paradoxical trends in mental health in the society and the root causes of increased mental health problems among young people. The HUNT Study, Norway.

|                           | Item No | Recommendation                                                                                                                                                                                    | Page in manus. |
|---------------------------|---------|---------------------------------------------------------------------------------------------------------------------------------------------------------------------------------------------------|----------------|
| <b>Title and abstract</b> | 1       | (a) Indicate the study's design with a commonly used term in the title or the abstract                                                                                                            | 2              |
|                           |         | (b) Provide in the abstract an informative and balanced summary of what was done and what was found                                                                                               | 2              |
| <b>Introduction</b>       |         |                                                                                                                                                                                                   |                |
| Background/rationale      | 2       | Explain the scientific background and rationale for the investigation being reported                                                                                                              | 3              |
| Objectives                | 3       | State specific objectives, including any prespecified hypotheses                                                                                                                                  | 4              |
| <b>Methods</b>            |         |                                                                                                                                                                                                   |                |
| Study design              | 4       | Present key elements of study design early in the paper                                                                                                                                           | 4-5            |
| Setting                   | 5       | Describe the setting, locations, and relevant dates, including periods of recruitment, exposure, follow-up, and data collection                                                                   | 4              |
| Participants              | 6       | (a) Give the eligibility criteria, and the sources and methods of selection of participants                                                                                                       | 4              |
| Variables                 | 7       | Clearly define all outcomes, exposures, predictors, potential confounders, and effect modifiers. Give diagnostic criteria, if applicable                                                          | 4-5            |
| Data sources/measurement  | 8*      | For each variable of interest, give sources of data and details of methods of assessment (measurement). Describe comparability of assessment methods if there is more than one group              | 4-5            |
| Bias                      | 9       | Describe any efforts to address potential sources of bias                                                                                                                                         | 11             |
| Study size                | 10      | Explain how the study size was arrived at                                                                                                                                                         | 4              |
| Quantitative variables    | 11      | Explain how quantitative variables were handled in the analyses. If applicable, describe which groupings were chosen and why                                                                      | 4              |
| Statistical methods       | 12      | (a) Describe all statistical methods, including those used to control for confounding                                                                                                             | 4              |
|                           |         | (b) Describe any methods used to examine subgroups and interactions                                                                                                                               | 4              |
|                           |         | (c) Explain how missing data were addressed                                                                                                                                                       | 5-6            |
|                           |         | (d) If applicable, describe analytical methods taking account of sampling strategy                                                                                                                | Na             |
|                           |         | (e) Describe any sensitivity analyses                                                                                                                                                             | Na             |
| <b>Results</b>            |         |                                                                                                                                                                                                   |                |
| Participants              | 13*     | (a) Report numbers of individuals at each stage of study—eg numbers potentially eligible, examined for eligibility, confirmed eligible, included in the study, completing follow-up, and analysed | 4              |
|                           |         | (b) Give reasons for non-participation at each stage                                                                                                                                              | 4              |
|                           |         | (c) Consider use of a flow diagram                                                                                                                                                                |                |
| Descriptive data          | 14*     | (a) Give characteristics of study participants (eg demographic, clinical, social) and information on exposures and potential confounders                                                          | 5              |
|                           |         | (b) Indicate number of participants with missing data for each variable of interest                                                                                                               | 5              |

|                          |     |                                                                                                                                                                                                              |             |
|--------------------------|-----|--------------------------------------------------------------------------------------------------------------------------------------------------------------------------------------------------------------|-------------|
| Outcome data             | 15* | Report numbers of outcome events or summary measures                                                                                                                                                         | 5           |
| Main results             | 16  | (a) Give unadjusted estimates and, if applicable, confounder-adjusted estimates and their precision (eg, 95% confidence interval). Make clear which confounders were adjusted for and why they were included | 6-9         |
|                          |     | (b) Report category boundaries when continuous variables were categorized                                                                                                                                    | 5-9         |
|                          |     | (c) If relevant, consider translating estimates of relative risk into absolute risk for a meaningful time period                                                                                             |             |
| Other analyses           | 17  | Report other analyses done—eg analyses of subgroups and interactions, and sensitivity analyses                                                                                                               | Na          |
| <b>Discussion</b>        |     |                                                                                                                                                                                                              |             |
| Key results              | 18  | Summarise key results with reference to study objectives                                                                                                                                                     | 9           |
| Limitations              | 19  | Discuss limitations of the study, taking into account sources of potential bias or imprecision. Discuss both direction and magnitude of any potential bias                                                   | 11          |
| Interpretation           | 20  | Give a cautious overall interpretation of results considering objectives, limitations, multiplicity of analyses, results from similar studies, and other relevant evidence                                   | 9-10, 11-12 |
| Generalisability         | 21  | Discuss the generalisability (external validity) of the study results                                                                                                                                        | 10          |
| <b>Other information</b> |     |                                                                                                                                                                                                              |             |
| Funding                  | 22  | Give the source of funding and the role of the funders for the present study and, if applicable, for the original study on which the present article is based                                                | 13          |

\*Give information separately for exposed and unexposed groups.

**Note:** An Explanation and Elaboration article discusses each checklist item and gives methodological background and published examples of transparent reporting. The STROBE checklist is best used in conjunction with this article (freely available on the Web sites of PLoS Medicine at <http://www.plosmedicine.org/>, Annals of Internal Medicine at <http://www.annals.org/>, and Epidemiology at <http://www.epidem.com/>). Information on the STROBE Initiative is available at [www.strobe-statement.org](http://www.strobe-statement.org).

# BMJ Open

## Divergent decennial trends in mental health according to age reveal poorer mental health for young people. Repeated cross-sectional population-based surveys from the HUNT Study, Norway

|                                 |                                                                                                                                                                                                                                                                                                                                                                                                                                                                                                                                                                                                                                                                                                                                                                                                                                                                                                                                                                                                                                                                                                                                                                                                                                                                                                                                                                                |
|---------------------------------|--------------------------------------------------------------------------------------------------------------------------------------------------------------------------------------------------------------------------------------------------------------------------------------------------------------------------------------------------------------------------------------------------------------------------------------------------------------------------------------------------------------------------------------------------------------------------------------------------------------------------------------------------------------------------------------------------------------------------------------------------------------------------------------------------------------------------------------------------------------------------------------------------------------------------------------------------------------------------------------------------------------------------------------------------------------------------------------------------------------------------------------------------------------------------------------------------------------------------------------------------------------------------------------------------------------------------------------------------------------------------------|
| Journal:                        | <i>BMJ Open</i>                                                                                                                                                                                                                                                                                                                                                                                                                                                                                                                                                                                                                                                                                                                                                                                                                                                                                                                                                                                                                                                                                                                                                                                                                                                                                                                                                                |
| Manuscript ID                   | bmjopen-2021-057654.R2                                                                                                                                                                                                                                                                                                                                                                                                                                                                                                                                                                                                                                                                                                                                                                                                                                                                                                                                                                                                                                                                                                                                                                                                                                                                                                                                                         |
| Article Type:                   | Original research                                                                                                                                                                                                                                                                                                                                                                                                                                                                                                                                                                                                                                                                                                                                                                                                                                                                                                                                                                                                                                                                                                                                                                                                                                                                                                                                                              |
| Date Submitted by the Author:   | 16-Apr-2022                                                                                                                                                                                                                                                                                                                                                                                                                                                                                                                                                                                                                                                                                                                                                                                                                                                                                                                                                                                                                                                                                                                                                                                                                                                                                                                                                                    |
| Complete List of Authors:       | Krokstad, Steinar; Norwegian University of Science and Technology, UNT Research Centre, Department of Public Health and Nursing; Nord-Trøndelag Hospital Trust, Levanger Hospital<br>Weiss, Daniel; Nord Universitetet, Faculty of Social Sciences<br>Krokstad, Morten; Nord Universitet - Levanger Campus, Faculty of Health Sciences and Nursing; Norwegian University of Science and Technology, Department of Mental Health<br>Rangul, Vegar; Norwegian University of Science and Technology, HUNT Research Centre, Department of Public Health and Nursing, Faculty of Medicine and Health Sciences; Nord Universitet - Levanger Campus, Faculty of Health Sciences and Nursing<br>Kvaløy, Kirsti; Norwegian University of Science and Technology, HUNT Research Centre; Nord-Trøndelag Hospital Trust, Levanger Hospital<br>Ingul, Jo; Nord-Trøndelag Hospital Trust, Levanger Hospital<br>Bjerkeset, Ottar; Nord Universitet - Levanger Campus, Faculty of Health Sciences and Nursing; Norwegian University of Science and Technology, Department of Mental Health<br>Twenge, Jean; San Diego State University, Department of Psychology, College of Sciences<br>Sund, Erik; Norwegian University of Science and Technology, HUNT Research Centre, Department of Public Health and Nursing; Nord Universitet - Levanger Campus, Faculty of Health Sciences and Nursing |
| <b>Primary Subject Heading</b>: | Public health                                                                                                                                                                                                                                                                                                                                                                                                                                                                                                                                                                                                                                                                                                                                                                                                                                                                                                                                                                                                                                                                                                                                                                                                                                                                                                                                                                  |
| Secondary Subject Heading:      | Mental health, Epidemiology, Health policy                                                                                                                                                                                                                                                                                                                                                                                                                                                                                                                                                                                                                                                                                                                                                                                                                                                                                                                                                                                                                                                                                                                                                                                                                                                                                                                                     |
| Keywords:                       | MENTAL HEALTH, PUBLIC HEALTH, EPIDEMIOLOGY, SOCIAL MEDICINE                                                                                                                                                                                                                                                                                                                                                                                                                                                                                                                                                                                                                                                                                                                                                                                                                                                                                                                                                                                                                                                                                                                                                                                                                                                                                                                    |
|                                 |                                                                                                                                                                                                                                                                                                                                                                                                                                                                                                                                                                                                                                                                                                                                                                                                                                                                                                                                                                                                                                                                                                                                                                                                                                                                                                                                                                                |

SCHOLARONE™  
Manuscripts



I, the Submitting Author has the right to grant and does grant on behalf of all authors of the Work (as defined in the below author licence), an exclusive licence and/or a non-exclusive licence for contributions from authors who are: i) UK Crown employees; ii) where BMJ has agreed a CC-BY licence shall apply, and/or iii) in accordance with the terms applicable for US Federal Government officers or employees acting as part of their official duties; on a worldwide, perpetual, irrevocable, royalty-free basis to BMJ Publishing Group Ltd ("BMJ") its licensees and where the relevant Journal is co-owned by BMJ to the co-owners of the Journal, to publish the Work in this journal and any other BMJ products and to exploit all rights, as set out in our [licence](#).

The Submitting Author accepts and understands that any supply made under these terms is made by BMJ to the Submitting Author unless you are acting as an employee on behalf of your employer or a postgraduate student of an affiliated institution which is paying any applicable article publishing charge ("APC") for Open Access articles. Where the Submitting Author wishes to make the Work available on an Open Access basis (and intends to pay the relevant APC), the terms of reuse of such Open Access shall be governed by a Creative Commons licence – details of these licences and which [Creative Commons](#) licence will apply to this Work are set out in our licence referred to above.

Other than as permitted in any relevant BMJ Author's Self Archiving Policies, I confirm this Work has not been accepted for publication elsewhere, is not being considered for publication elsewhere and does not duplicate material already published. I confirm all authors consent to publication of this Work and authorise the granting of this licence.

Manuscript revision\_2 BMJOpen Clean

1  
2  
3  
4  
5 1  
6  
7  
8 2 Divergent decennial trends in mental health according to age  
9 reveal poorer mental health for young people. Repeated cross-  
10 sectional population-based surveys from the HUNT Study,  
11 3  
12 4  
13 5 Norway  
14  
15  
16  
17  
18  
19  
20  
21  
22  
23  
24  
25  
26  
27  
28  
29  
30  
31  
32  
33  
34  
35  
36  
37  
38  
39  
40  
41  
42  
43  
44  
45  
46  
47  
48  
49  
50  
51  
52  
53  
54  
55  
56  
57  
58  
59  
60

8 Steinar Krokstad (000-0002-2932-6675), Daniel Albert Weiss, Morten Austheim Krokstad, Vegar Rangul, Kirsti Kvaløy, Jo Magne Ingul, Ottar Bjerkeset, Jean Marie Twenge, Erik Reidar Sund.

11 Steinar Krokstad, professor, HUNT Research Centre, Department of Public Health and Nursing, Norwegian University of Science and Technology, 7600 Levanger, Norway.

13 Daniel Albert Weiss, associate professor, Nord University, Faculty of Social Sciences, Universitetsalléen 11, 8026 Bodø, Norway.

15 Morten Austheim Krokstad, PhD Fellow, Faculty of Health Sciences and Nursing, Nord University, 7600 Levanger, Norway.

17 Vegar Rangul, associate professor, HUNT Research Centre, Department of Public Health and Nursing, Norwegian University of Science and Technology, 7600 Levanger, Norway.

19 Kirsti Kvaløy, professor, HUNT Research Centre, Department of Public Health and Nursing, Norwegian University of Science and Technology, 7600 Levanger, Norway.

21 Jo Magne Ingul, psychologist, Levanger Hospital, Nord-Trøndelag Hospital Trust, 7600 Levanger, Norway.

23 Ottar Bjerkeset, professor, Faculty of Health Sciences and Nursing, Nord University, 7600 Levanger, Norway.

25 Jean Marie Twenge, professor, Department of Psychology, College of Sciences, San Diego State University, San Diego, CA 92182-4611, USA.

27 Erik Reidar Sund, senior researcher, HUNT Research Centre, Department of Public Health and Nursing, Norwegian University of Science and Technology, 7600 Levanger, Norway.

30 Correspondence to: Steinar Krokstad (000-0002-2932-6675) [steinar.krokstad@ntnu.no](mailto:steinar.krokstad@ntnu.no)



Manuscript revision\_2 BMJOpen Clean

32

33

## 34 Abstract

35 **Objectives.** Public health trends are formed by political, economic, historical, and cultural factors in  
36 society. The aim of this paper was to describe overall changes in mental health among adolescents  
37 and adults in a Norwegian population over the three last decades and discuss some potential  
38 explanations for these changes.

39 **Design.** Repeated population-based health surveys to monitor decennial changes.

40 **Setting.** Data from three cross-sectional surveys in in 1995-97, 2006-08 and 2017-19 in the  
41 population-based HUNT Study in Norway were used.

42 **Participants.** The general population in a Norwegian County covering participants aged 13 to 79  
43 years, ranging from 48 000 to 62 000 in each survey.

44 **Main outcome measures.** Prevalence estimates of subjective anxiety and depression symptoms  
45 stratified by age and gender were assessed using the Hopkins Symptom Check-List 5 (HSCL-5) for  
46 adolescents and the Hospital Anxiety and Depression Scale (HADS) for adults.

47 **Results.** Adolescents' and young adults' mental distress increased sharply, especially between 2006-  
48 08 and 2017-19. However, depressive symptoms instead declined among adults ages 60 and over  
49 and anxiety symptoms remained largely unchanged in these groups.

50 **Conclusions.** Our trend data from the HUNT Study in Norway indicate poorer mental health among  
51 adolescents and young adults that we suggest are related to relevant changes in young people's  
52 living conditions and behavior, including the increased influence of screen-based media.

53

54

55

## 56 Strengths and limitations of this study

- 57 ➤ The HUNT Study is a large general county population health survey repeated every decade since
- 58 the 1980s in Norway, suitable for following trends in public health
- 59 ➤ The total population 13+ years are invited to complete the survey
- 60 ➤ Identical screening tools for measuring anxiety and depression symptoms have been used in all
- 61 three surveys covered by this article; Hopkins Symptoms Check List 5 for adolescents and
- 62 Hospital Anxiety and Depression Scale for adults
- 63 ➤ Data covered approximately 78% of the total adolescent population and 54% to 70% of the total
- 64 adult population with the risk of selection bias
- 65 ➤ Changes in socio-cultural and behavioral attitudes towards depression, anxiety, and mental
- 66 health in general in recent years may have made it easier for participants to report mental
- 67 health concerns in questionnaires that may have introduced some reporting bias.

68

Manuscript revision\_2 BMJOpen Clean

1  
2  
3  
4  
5  
6  
7  
8  
9  
10  
11  
12  
13  
14  
15  
16  
17  
18  
19  
20  
21  
22  
23  
24  
25  
26  
27  
28  
29  
30  
31  
32  
33  
34  
35  
36  
37  
38  
39  
40  
41  
42  
43  
44  
45  
46  
47  
48  
49  
50  
51  
52  
53  
54  
55  
56  
57  
58  
59  
60

69

For peer review only

## 70 Introduction

71 Mental health problems are among the leading causes of disease burden worldwide.<sup>1,2</sup> Further,  
72 mental health issues are primary drivers of disability worldwide, causing over 40 million years of  
73 disability in 20 to 29-year-olds.<sup>3</sup> Depression alone accounts for more disability-adjusted life years  
74 (DALYs) than all other mental disorders together<sup>4</sup> and is projected to become the leading cause of  
75 disability in high-income countries by 2030.<sup>5</sup> Thus, the public health burden of mood disorders is  
76 substantial, with negative effects including functional problems, reduced quality of life, disability,  
77 low work productivity, increased mortality, and increased health care utilization.

78 In Norway, estimates of years lived with disability in 2016 display anxiety and depression ranked as  
79 number four and seven on the list of the most contributing diseases in the Global Burden of Disease  
80 statistics.<sup>6</sup> Mental disorders are highly prevalent in disability benefit statistics, with awards often  
81 granted at younger ages than for other diagnoses. Mental disorders have additionally been shown to  
82 be responsible for the most working years lost (33.8%) of any disability.<sup>7</sup>

83 During the last decade, rates of depressive symptoms have increased in several adolescent  
84 populations.<sup>8-10</sup> In the USA, rates of depression, self-harm, and suicide attempts increased  
85 substantially in adolescents after 2010.<sup>11-13</sup> On the other hand, data have paradoxically shown an  
86 improvement in mental health with age indicating the opposite trend among older people.<sup>14,15</sup>

87 Several prominent research-based theories and models, which have provided significant support to  
88 modern understanding and practice of health promotion and disease prevention, may offer insights  
89 into understanding the causes of current trends in mental health. The World Health Organization's  
90 Commission on the Social Determinants of Health (SDH), for example, defined the SDH as "the  
91 conditions in which people are born, grow, live, work and age" as the fundamental drivers of public  
92 health.<sup>16</sup> Thus, when observing emerging trends in population health, it is important to look at the  
93 underlying conditions that may drive the changes. The eminent epidemiologist Geoffrey Rose  
94 stressed that the determinants of individual cases and the determinants of incidence rates are two  
95 different issues. The second seeks the causes of changing incidence of health problems in the  
96 population.<sup>17</sup> This theory argues that political, economic, historical, and cultural trends in Western  
97 societies may have affected mental health by influencing changes in social living conditions.  
98 Neoliberalism has been the dominating political ideology in Europe and US since the 1980s.  
99 Economic growth has been the main priority of the neoliberal agenda, together with the  
100 deregulation of economies, forcing open national and international markets to trade.<sup>18</sup> This has  
101 contributed to major changes in the living conditions of groups in societies around the world,  
102 including young people. For many, optimism and the belief in economic growth and improved  
103 quality of life have been replaced by concerns about climate change, growing social injustice, threats  
104 to democracy and the threat of technological developments leading to increased exploitation and  
105 potentially magnifying many of these other concerns.<sup>19</sup> These concerns have become particularly  
106 visible for young people growing up in many western, developed societies.

107 It has become increasingly apparent that the rapidly growing global unregulated information  
108 technology sector collects and mines enormous amounts of data on individuals.<sup>20</sup> The term *dataism*  
109 is used to describe the mindset or philosophy created by this trend. Recently, the term has been  
110 expanded to describe what others, including leading historian Yuval Noah Harari and leading social  
111 psychologist Shoshana Zuboff, has called an emerging form of capitalism, ideology, or even a new  
112 form of religion.<sup>20,21</sup> The increase in global interactions has caused a growth in international trade  
113 and the exchange of ideas and culture. Consumerism, the increasing polarization due to so-called  
114 technologically produced "echo-chambers" in digitally mediated spaces of social interaction are but

1  
2  
3 115 a few of the trends influencing these developments.<sup>22</sup> Taking selfies, and along with that, improving  
4 116 our image for public consumption have become regular in younger generations.<sup>23</sup>

6 117 Driven by these societal and technological trends, the use of the internet began to increase in the  
7 118 early 2000s, and smartphones after 2010. Social media also became more popular after 2010. These  
8 119 trends may have had a significant impact on human behavior, especially among adolescents and  
9 120 young adults. In several large studies, heavy users of such technologies are more likely to be  
10 121 depressed<sup>9 24</sup> or have lower levels of well-being.<sup>9 25</sup> Similarly, the HUNT Study of Norway have shown  
11 122 associations between the number of hours of screen time and increased mental health illness, which  
12 123 was particularly strong in girls when screen time predominantly involved the use of social media and  
13 124 internet.<sup>26</sup> Declines in face-to-face social interaction among adolescents may also impact even non-  
14 125 users of digital media, increasing the need for social assurance and reducing opportunities for in-  
15 126 person social interaction.<sup>27</sup> However, the need for social assurance fueled by excessive smartphone  
16 127 use is often not gratified, and eventually leads to greater loneliness.<sup>28</sup> Some evidence suggests that  
17 128 increased time spent using these technologies and, more generally, exposure to the evolving  
18 129 modern technological environment may be causes of the sudden increase in depression since  
19 130 2010.<sup>11</sup> Stronger associations between digital media time and mental health indicators has been  
20 131 shown in girls compared to boys, perhaps because social media, used more frequently by girls, is  
21 132 more strongly linked to depression than gaming, used more frequently by boys.<sup>9</sup> Furthermore,  
22 133 research on adolescents in Norway has associated psychiatric problems with sleep quality problems,  
23 134 which are exacerbated by the use of social media and computer gaming among adolescents.<sup>29-31</sup> In  
24 135 addition, higher academic pressure following the dominant political preoccupation with competition  
25 136 and a credentials-based labor market influencing educational programs may also have increased  
26 137 mental distress among adolescents and students.<sup>32 33</sup> A Norwegian study has shown a clear decline in  
27 138 young peoples' reporting of happiness and life satisfaction over the last ten years. The study  
28 139 showed that increasing concern about the future contributed most to the decline. This concern was  
29 140 related to fears of various adverse events, such as future job opportunities and one's own financial  
30 141 situation. Other conditions such as dissatisfaction with social relationships, health, physical fitness  
31 142 and body also had significance.<sup>34</sup>

32 143 The aim of this paper was to describe the parallel changes in mental health among adolescents and  
33 144 adults in a Norwegian population over the three last decades and suggest some potential  
34 145 explanations for these changes based on theories related to the social determinants of health.<sup>16 17</sup>

35 146

## 36 147 **Methods**

37 148 The data were taken from three different waves in the Trøndelag Health Study (HUNT), Young-  
38 149 HUNT1 and HUNT2 (1995-97), Young-HUNT3 and HUNT3 (2006-08) and Young-HUNT4 and HUNT4  
39 150 (2017-19)(figure 1).<sup>35</sup> The invited participants were the total population in the Nord-Trøndelag  
40 151 County area aged 13-19 years (Young-HUNT) and 20+ years (HUNT).<sup>36</sup> The numbers and attendance  
41 152 rates are shown in figure 1. The samples ranged from 8980 to 8066 adolescent participants and from  
42 153 62 444 to 48 362 adult participants.

43 154

44 155 **Figure 1.** Data collected in the HUNT Study, Norway. Number of participants and response rates.<sup>35 36</sup>

45 156

Data from the different decades were stratified by age and sex. In the Young-HUNT surveys, we applied the Hopkins Symptom Checklist–5 (SCL-5). Hopkins Symptom Checklist–25 (SCL-25) is a widely applied self-report measure of depression and anxiety symptoms. Compared with the SCL-25, the short form model fit is good and correlations with established measures demonstrate convergent validity.<sup>37 38</sup> Prevalence (%) of depression and anxiety symptoms were measured with SCL-5 (cut-off  $\geq 2$ ). For adults, we applied the Hospital Anxiety and Depression Scale (HADS). The HADS is a brief 14-item self-report questionnaire, consisting of seven items for the anxiety subscale (HADS-A) and seven for the depression subscale (HADS-D), each scored on a Likert-scale from 0 (no symptoms) to 3 (symptoms maximally present). For this study, valid ratings of the HADS-D and HADS-A were defined as at least five completed items on both subscales. The score of those who filled in five or six items was based on the sum of completed items multiplied with 7/5 or 7/6, respectively. We used the conventional cut-off threshold of  $\geq 8$  for the HADS subscales. This cut off value is found to provide optimal sensitivity and specificity (about 0.80) and a good correlation with the case of clinical depression based on DSM-III and ICD–8/9 diagnostic criteria [34]. HADS is found to perform well in assessing the symptom severity and case categorization of anxiety and depressive disorders in the general population and in somatic, psychiatric and primary care patients.<sup>39</sup> Results are reported as prevalence (in %) along with 95 per cent confidence intervals (95% CI) and we also report p-values for linear trend according to time. Data management and analyses were done with Stata v. 16.<sup>40</sup>

### Patient and public involvement

Public stakeholders and patient organizations have been involved in the planning of all HUNT surveys. No patients were involved in the design or implementation of this specific study. As the study used previously collected data, we did not ask patients or the public to assess the burden of participation. Public stakeholders and patient organizations are involved in dissemination of results from the HUNT Study.

### Ethical approval

This study was approved by the Regional Committees for Medical and Health Research Ethics; REC south-east, Norway 196364/2020. All participants gave informed consent before taking part in the HUNT Study.

## Results

The percentage of adolescents screening positive for anxiety and depression nearly doubled between 1995-97 and 2017-19, from 15.3% to 29.8%, with most of the increase occurring between 2006-08 and 2017-19 (see Table 1).

**Table 1.** Characteristics for the sample aged 13-19 years. The Young-HUNT Study.<sup>36</sup>

|     |         | Young HUNT1<br>1995-97 |      | Young HUNT3<br>2006-08 |      | Young HUNT4<br>2017-19 |      |
|-----|---------|------------------------|------|------------------------|------|------------------------|------|
|     |         | N                      | %    | N                      | %    | N                      | %    |
| Age | 13-19 y | 8980                   | 100  | 8199                   | 100  | 8066                   | 100  |
| Sex |         |                        |      |                        |      |                        |      |
|     | Girls   | 4463                   | 49.7 | 4128                   | 50.4 | 4106                   | 50.9 |
|     | Boys    | 4517                   | 50.3 | 4071                   | 49.6 | 3960                   | 49.1 |

## Manuscript revision\_2 BMJOpen Clean

## SCL-5\*

|         |      |      |      |      |      |      |
|---------|------|------|------|------|------|------|
| Low     | 7412 | 82.5 | 6441 | 78.6 | 5410 | 67.1 |
| High    | 1372 | 15.3 | 1520 | 18.5 | 2404 | 29.8 |
| Missing | 196  | 2.2  | 238  | 2.9  | 252  | 3.1  |
| Total   | 8980 | 100  | 8199 | 100  | 8066 | 100  |

\*Hopkins Symptom Checklist-5 (SCL-5) cut-off  $\geq 2$ .

The percentage of adults screening positive for depression declined from 9.4% in 1995-97 to 6.7% in 2017-19, and the percentage screening positive for anxiety increased from 12.4% in 1995-97 to 13.4% in 2017-19 (see Table 2).

**Table 2.** Characteristics for the sample aged 20-79 years. The HUNT Study.<sup>35</sup>

|                  | HUNT2<br>(1995-97) |        | HUNT3<br>(2006-08) |        | HUNT4<br>(2017-19) |        |
|------------------|--------------------|--------|--------------------|--------|--------------------|--------|
|                  | N                  | (%)    | N                  | (%)    | N                  | (%)    |
| Age groups       |                    |        |                    |        |                    |        |
| 20-29 y          | 9111               | (14.6) | 4511               | (9.3)  | 6428               | (12.3) |
| 30-39 y          | 11630              | (18.6) | 6859               | (14.2) | 6755               | (12.9) |
| 40-49 y          | 13603              | (21.8) | 10012              | (20.7) | 9002               | (17.2) |
| 50-59 y          | 11058              | (17.7) | 11425              | (23.6) | 10761              | (20.5) |
| 60-69 y          | 9048               | (14.5) | 9801               | (20.3) | 11186              | (21.3) |
| 70-79 y          | 7994               | (12.8) | 5754               | (11.9) | 8310               | (15.9) |
| Sex              |                    |        |                    |        |                    |        |
| Females          | 32991              | (52.8) | 26316              | (54.4) | 28488              | (54.3) |
| Males            | 29453              | (47.2) | 22046              | (45.6) | 23954              | (45.7) |
| HADS Depression* |                    |        |                    |        |                    |        |
| Low              | 51049              | (81.8) | 34301              | (70.9) | 35271              | (67.3) |
| High             | 5855               | (9.4)  | 3453               | (7.1)  | 3505               | (6.7)  |
| Missing          | 5540               | (8.9)  | 10608              | (21.9) | 13666              | (26.1) |
| HADS Anxiety*    |                    |        |                    |        |                    |        |
| Low              | 44462              | (71.2) | 32192              | (66.6) | 31594              | (60.3) |
| High             | 7736               | (12.4) | 5387               | (11.1) | 7004               | (13.4) |
| Missing          | 10246              | (16.4) | 10783              | (22.3) | 13844              | (26.4) |
| Total            | 62444              | (100)  | 48362              | (100)  | 52442              | (100)  |

\* Hospital Anxiety and Depression Scale (HADS) cut-off  $\geq 8$ .

Table 3 shows the trends in prevalence (%) and 95 % confidence interval (95 % CI) for symptoms of poor mental health by age group and sex. Among adolescents, the prevalence of depression and anxiety symptoms above the recommended cut-off on the SCL-5 scale<sup>38</sup> was 10.2% for boys and 21.1% for girls in the 1990s. In the latest survey (2017-19), the prevalence had changed to 16.5% for boys and 44.4% for girls, i.e. particularly large change in the last ten years for girls (figure 2).

## Manuscript revision\_2 BMJOpen Clean

**Table 3.** Prevalence (%) and 95 per cent confidence interval (95% CI) for symptoms of depression and anxiety by age group and sex. The HUNT Study, Norway.

| Adolescents          |       | Young-HUNT1<br>1995-97 |               | Young-HUNT3<br>2006-08 |               | Young-HUNT4<br>2017-19 |               | P-value<br>for trend |
|----------------------|-------|------------------------|---------------|------------------------|---------------|------------------------|---------------|----------------------|
|                      |       | Prevalence             | 95% CI        | Prevalence             | 95% CI        | Prevalence             | 95% CI        |                      |
| SCL-5*               |       |                        |               |                        |               |                        |               |                      |
| Girls                | 13-19 | 21.1                   | (19.9- 22.3)  | 27.3                   | (26.0- 28.7)  | 44.4                   | (42.8- 45.9)  | 0.000                |
| Boys                 | 13-19 | 10.2                   | (9.3- 11.1)   | 10.6                   | (9.7- 11.6)   | 16.5                   | (15.4- 17.7)  | 0.000                |
| Adults               |       | HUNT2                  |               | HUNT3                  |               | HUNT4                  |               |                      |
| HADS<br>depression** |       |                        |               |                        |               |                        |               |                      |
| Females              | 20-29 | 4.2                    | (3.7 - 4.8)   | 4.6                    | (3.7 - 5.7)   | 10.7                   | (9.5 - 12.0)  | 0.000                |
|                      | 30-39 | 6.9                    | (6.3 - 7.6)   | 6.3                    | (5.5 - 7.2)   | 8.9                    | (7.9 - 10.1)  | 0.004                |
|                      | 40-49 | 9.3                    | (8.6 - 10.0)  | 7.7                    | (6.9 - 8.5)   | 9.0                    | (8.2 - 10.0)  | 0.377                |
|                      | 50-59 | 12.3                   | (11.5 - 13.3) | 9.0                    | (8.3 - 9.9)   | 8.4                    | (7.7 - 9.3)   | 0.000                |
|                      | 60-69 | 14.2                   | (13.2 - 15.3) | 8.8                    | (8.0 - 9.7)   | 7.4                    | (6.7 - 8.2)   | 0.000                |
|                      | 70-79 | 17.5                   | (16.3 - 18.9) | 12.6                   | (11.4 - 14.0) | 7.6                    | (6.8 - 8.5)   | 0.000                |
| Males                | 20-29 | 3.9                    | (3.3 - 4.5)   | 5.8                    | (4.5 - 7.4)   | 10.2                   | (8.7 - 11.9)  | 0.000                |
|                      | 30-39 | 6.9                    | (6.2 - 7.6)   | 7.3                    | (6.2 - 8.6)   | 11.6                   | (10.2 - 13.2) | 0.000                |
|                      | 40-49 | 10.4                   | (9.7 - 11.2)  | 9.0                    | (8.0 - 10.0)  | 10.2                   | (9.0 - 11.4)  | 0.358                |
|                      | 50-59 | 13.6                   | (12.7 - 14.6) | 10.5                   | (9.6 - 11.4)  | 9.4                    | (8.5 - 10.4)  | 0.000                |
|                      | 60-69 | 13.9                   | (12.8 - 15.0) | 11.1                   | (10.2 - 12.1) | 8.4                    | (7.6 - 9.3)   | 0.000                |
|                      | 70-79 | 16.8                   | (15.4 - 18.2) | 13.7                   | (12.4 - 15.2) | 10.5                   | (9.5 - 11.6)  | 0.000                |
| HADS anxiety**       |       |                        |               |                        |               |                        |               |                      |
| Females              | 20-29 | 15.5                   | (14.4 - 16.5) | 19.1                   | (17.4 - 21.0) | 32.0                   | (30.1 - 33.9) | 0.000                |
|                      | 30-39 | 17.1                   | (16.1 - 18.1) | 17.8                   | (16.5 - 19.2) | 26.7                   | (25.1 - 28.4) | 0.000                |
|                      | 40-49 | 17.9                   | (17.0 - 18.9) | 17.1                   | (16.0 - 18.2) | 22.1                   | (20.8 - 23.4) | 0.000                |
|                      | 50-59 | 18.6                   | (17.5 - 19.8) | 18.0                   | (17.0 - 19.1) | 20.4                   | (19.3 - 21.6) | 0.028                |
|                      | 60-69 | 18.0                   | (16.7 - 19.3) | 16.4                   | (15.4 - 17.6) | 17.9                   | (16.8 - 19.0) | 0.896                |
|                      | 70-79 | 17.2                   | (15.7 - 18.8) | 17.2                   | (15.8 - 18.8) | 16.2                   | (15.0 - 17.4) | 0.290                |
| Males                | 20-29 | 11.9                   | (10.9 - 13.0) | 12.0                   | (10.2 - 14.2) | 19.0                   | (17.0 - 21.2) | 0.000                |
|                      | 30-39 | 12.9                   | (12.0 - 13.9) | 11.4                   | (10.0 - 12.9) | 18.8                   | (17.0 - 20.7) | 0.000                |
|                      | 40-49 | 14.0                   | (13.2 - 15.0) | 12.5                   | (11.4 - 13.7) | 16.5                   | (15.1 - 18.0) | 0.030                |
|                      | 50-59 | 12.5                   | (11.6 - 13.5) | 11.7                   | (10.8 - 12.7) | 15.2                   | (14.0 - 16.4) | 0.001                |
|                      | 60-69 | 9.2                    | (8.3 - 10.2)  | 8.5                    | (7.6 - 9.4)   | 11.0                   | (10.1 - 12.0) | 0.004                |
|                      | 70-79 | 9.4                    | (8.2 - 10.6)  | 6.5                    | (5.6 - 7.6)   | 8.4                    | (7.5 - 9.4)   | 0.325                |

\*Hopkins Symptom Checklist-5 (SCL-5) cut-off  $\geq 2$ .

\*\* Hospital Anxiety and Depression Scale (HADS) cut-off  $\geq 8$ .

**Figure 2.** Prevalence (%) of depression and anxiety symptoms measured with SCL-5 (cut-off  $\geq 2$ ), from three decades of adolescents in the Young-HUNT Study.

For adults, table 3 shows that an increasing prevalence for depressive symptoms above cut-off with age was observed in both sexes, from around four percent among young adults 20-29 years and around 17% among older people 70-79 years in 1995-97 (figure 3). In contrast to this, the highest

Manuscript revision\_2 BMJOpen Clean

219 prevalence among young women (10.7%), and the lowest among the elderly aged 70-79 (7.6%) were  
220 observed in the last survey (2017-19) (figure 3).

221

222 **Figure 3.** Prevalence (%) of depression symptoms measured with HADS-D (cut-off  $\geq 8$ ) from three  
223 decades, the HUNT Study.

224

225 The prevalence of anxiety symptoms above cut-off measured with HADS-A was similar in all age  
226 groups in 1995-97 (table 3); around 10% for men and 17% for women. In the last survey, we  
227 observed a markedly higher prevalence of anxiety symptoms for both genders for participants aged  
228 20-39 years (figure 4).

229

230 **Figure 4.** Prevalence (%) of anxiety symptoms measured with HADS-A (cut-off  $\geq 8$ ) from three  
231 decades, the HUNT Study.

232

233 The negative trends among young adults and the positive trends among older participants shown in  
234 figures 3 and 4 were statistically significant in almost all groups (appendix table 1).

235

## 236 Discussion

237 Results from the large Norwegian population-based HUNT Study of more than 170,000 people  
238 showed large increases in the prevalence of depression and anxiety symptoms among adolescents  
239 and young adults since the 1990s, especially between 2006-08 and 2017-19. These increases were  
240 largest among young women, though there were also increases among young men. In contrast,  
241 among older adults rates of depressive symptoms declined and anxiety symptoms remained largely  
242 unchanged.

243

### 244 *Possible reasons for change*

245 An important question is whether the increases in mental health illness were influenced by changes  
246 in socio-cultural and behavioral attitudes towards depression, anxiety, and mental health in general.  
247 In recent years, mental health among young people has received increased attention in the  
248 Norwegian society. As a result, it may have become easier for young participants to report mental  
249 health concerns and express emotion in questionnaires. For the adult participants, we have used a  
250 different tool than for adolescents (HADS), however, the exact same trend for participants aged 20-  
251 39 years as in adolescents was identified. The opposite trend was observed for the elderly. The fact  
252 that two different instruments present similar trends among young people in our sample supports  
253 the validity of our findings. In addition, results are supported by data from the Norwegian health  
254 services and prescription databases, clearly demonstrating increasing numbers of individuals either  
255 referred for, or in need of treatment for mental health illness among young people.<sup>41</sup> The increase  
256 in reported depression and anxiety symptoms demonstrated in our data, is also accompanied by an  
257 increasing number of adolescents in the general population referred to mental health services,<sup>42</sup> an  
258 increased use of psychotropic drugs in age groups reporting increasing symptoms,<sup>43</sup> and an



## Manuscript revision\_2 BMJOpen Clean

1  
2  
3 259 increasing number of young adults in need of social welfare.<sup>44</sup> In addition, similar increases in mental  
4 260 health issues in countries such as the U.S. have been accompanied by concurrent increases in  
5 261 hospital admissions for self-harm behaviors and suicide attempts that cannot be attributed to  
6 262 changes in survey self-reports.<sup>45 46</sup> Consistent with the changes we see in our Norwegian data, a  
7 263 clear decline in young people's happiness and life satisfaction over the last ten years has been  
8 264 reported as well.<sup>34</sup>

9  
10  
11 265 Thus, taken together, evidence seems to suggest that the observed trends in poorer mental health  
12 266 among young people are real. To determine the causes behind such public health trends, is,  
13 267 however, challenging. Younger generations clearly face concerns that have increased in significance  
14 268 and importance throughout the previous few decades. These include worsening climate change,  
15 269 growing social injustice,<sup>47</sup> emerging threats to democratic institutions and the propagation of  
16 270 consequences related to the advent of innovative modern technological developments.<sup>19</sup> In  
17 271 addition, higher academic pressure reflects the dominant neoliberal political preoccupation with  
18 272 competition.<sup>33</sup> When young people's sense of self-worth is dependent on what they achieve in  
19 273 school, it can also lead to anxiety and depression if they do not achieve expected results.<sup>32</sup>

20  
21  
22  
23 274 Another substantial change in Western societies during the last decade, and which we believe may  
24 275 have great significance, has been in technology use. The tech industry's strong influence on young  
25 276 people's behavior using deliberately manipulative and exploitive strategies may be an important  
26 277 driver of the observed trends among young people in our data.<sup>11</sup> Growing use of social media as a  
27 278 daily activity has led to the emergence of ethical concerns related to the management of data.<sup>48</sup>  
28 279 Several studies have demonstrated the mechanisms of addiction to electronic devices used to access  
29 280 these digital ecosystems.<sup>20 49</sup> Addiction to social networks is a consequence of users' fear of missing  
30 281 out, feeling that they have an impact on others, and make them feel an instant reward when they  
31 282 publish content about themselves.<sup>48</sup> Evidence has shown that heavy users of social media, for  
32 283 example, are twice as likely as light users to be depressed or report lower levels of well-being.<sup>11</sup>  
33 284 These effects may be associated with an increase in the prevalence of loneliness seen after 2012<sup>28 50</sup>  
34 285 and reduced hours of sleep among adolescents.<sup>29 30</sup> Some have questioned the suggestion that  
35 286 increased time spent on social media is a leading cause of adverse mental health among young  
36 287 people, with individual data revealing only a weak association between time use and mental health  
37 288 in a longitudinal study.<sup>51</sup> However, associations at the individual level may be different from the  
38 289 group-level associations we examine here; even non-users of technology may be impacted by the  
39 290 changes in social interaction caused by technology use.<sup>11</sup> The increased acceptance, integration and  
40 291 near-obligatory use of internet-based media technologies to access services and social networks in  
41 292 society increasingly either isolate non-users or force them to conform. Furthermore, as social norms  
42 293 move away from in-person social interaction, even individuals interested in in-person interactions  
43 294 find it increasingly difficult to find others to do so with. Social media is social, not just individual, and  
44 295 naturally possesses powerful network effects.<sup>27</sup> Thus, it becomes necessary to look further into the  
45 296 political, historical and cultural context in which these behavioral changes unfold.<sup>17 52</sup>

46  
47  
48  
49  
50  
51 297 Among older segments of the population, we see no similar increase in mental health issues over the  
52 298 study period. In fact, our results highlight rather the opposite – improved mental health. Such trends  
53 299 have also been observed in other populations.<sup>14</sup> National survey data in Norway shows that social  
54 300 media use follows a consistent age gradient, with younger populations showing considerably more  
55 301 use of social media daily compared to older.<sup>53</sup> Older people in Norway benefit from good living  
56 302 conditions with financial security in a generous welfare state<sup>54</sup> and good prospects of high life  
57 303 expectancy.<sup>55</sup> Older individuals may also benefit from emotional regulation and complex social

Manuscript revision\_2 BMJOpen Clean

1  
2  
3 304 decision-making, and thus be able to cope with the stress of technological developments in other  
4 305 ways than young people.<sup>14 56</sup>

5  
6 306

7  
8 307 *Strengths*

9  
10 308 The HUNT Study collects data from a total population at approximately ten years intervals, enabling  
11 309 studies of health changes in the population over time.<sup>35 36</sup> The invitation/sampling of participants,  
12 310 and methods for measuring mental health, have been conducted using the same methods and  
13 311 instruments in all three surveys included in the present study. Large sample sizes have ensured  
14 312 reliable estimates. Health trends in the county follow both national<sup>57</sup> and international western  
15 313 health trends closely.<sup>58</sup> The population is stable and relatively homogenous with a low net migration.  
16 314 As part of a national Nordic welfare state, the population recruited is part of a country with a  
17 315 universal public health service and a school system where almost everyone attends the same local  
18 316 schools.

19  
20 317

21  
22  
23 318 *Limitations*

24  
25 319 Our survey data covered approximately 78% of the total adolescent population and 70% to 54% of  
26 320 the total adult population (as the result of a decrease in participation from HUNT2 to HUNT3 among  
27 321 adults). Non-response analyzes for adult participants have shown that those who choose not to  
28 322 participate generally have a higher mortality rate, slightly higher prevalence of chronic illness, and  
29 323 lower socioeconomic position than participants.<sup>59</sup> This may have biased our findings so that  
30 324 unfavorable trends among adolescents are underestimated and favorable trends among adults are  
31 325 overestimated. The study design does not allow for causal inferences.

32  
33  
34 326

35  
36 327 *Relevance*

37  
38 328 The tech industry's strong influence on young people's behavior has taken place without notable  
39 329 political concern in Norway or other western countries, in line with dominating neoliberal political  
40 330 ideology.<sup>18 60</sup> This has allowed the rapid expansion of innovative technologies by commercial and  
41 331 corporate actors to facilitate the exploitation of spheres of society relatively untouched by capitalist  
42 332 interests before the emergence of these technologies. The consequences are however not going  
43 333 completely unrecognized and awareness is growing, in part represented by an emerging discussion  
44 334 and appreciation for addressing the power and influence of commercial<sup>61</sup> and corporate  
45 335 determinants of health.<sup>62</sup>

46  
47  
48 336 Our results are in line with results suggesting poorer mental health observed among adolescents and  
49 337 young adults internationally<sup>8 9</sup> and, more specifically, in the USA.<sup>11</sup> Supporting research shows,  
50 338 additionally, that social media use has significant effects on mental health, particularly in young  
51 339 people.<sup>25</sup> The data on both are of great interest to public health policy. The undesirable trend has  
52 340 affected many young people and affected everyday life substantially for large groups in Norway.  
53 341 Based on earlier findings from the HUNT Study, there is reason to forecast that poorer mental health  
54 342 may contribute to an increasing incidence of work-related incapacity in Norway now and in the years  
55 343 to come.<sup>6 63</sup>

56  
57  
58  
59 344  
60

Manuscript revision\_2 BMJOpen Clean

### 345 *Need for further research and need for action*

346 Our findings highlight the need for further research to find out if some of the reductions in mental  
347 health simply may be due to greater awareness of mental health or changes in reporting. It is,  
348 furthermore, necessary to investigate the broad range of potential driving factors underlying  
349 increased mental health problems in young people. The long term consequences will be important  
350 to follow, to see if the correlation between poorer mental health in adolescents and negative  
351 outcomes in adulthood will be as expected based on previous studies.<sup>63</sup> Based on what is outlined in  
352 this paper, there is every reason to consider policy measures to protect youth and young adults  
353 against increasing mental health distress. A public health policy is needed that strengthens faith in  
354 the future, demonstrating our influence on living conditions and reduced pressure and stress on  
355 young people. Experience and evidence from population-based public health and relevant research,  
356 provides reason to believe that increased regulation of the tech industry, which has enjoyed  
357 relatively few restrictions for decades, will be important moving forward. Governments and  
358 individuals could challenge their role in defining the dominant narrative, setting the rules by which  
359 trade operates, commodifying knowledge and undermining political, social, and economic rights in  
360 our society.<sup>62</sup> Relevant measures could be, but are not limited to, an enforced age minimum for use  
361 of social media and online computer gaming, creating increased accountability for the content  
362 published by technology companies and their platforms, regulations to restrict addictive elements of  
363 different software, and taxation of the industry to obtain funding for relevant public health  
364 initiatives. However, of greatest concern is restructuring and regulating the entire economic  
365 business model on which many of these tech giants not only depend on for their enormously  
366 powerful profits but have also had a central role in developing for the deliberate manipulation and  
367 exploitation of its most vulnerable users. Such measures would undoubtedly increase in  
368 effectiveness through systematic international cooperation. In addition, the effects of climate  
369 change and global economic policy and academic pressure as a result of dominant political ideology,  
370 also should be further investigated.<sup>52</sup>

### 372 *Conclusion*

373 The data from the HUNT Study in Norway indicate a strong increase in depression and anxiety  
374 symptoms among adolescents and young adults, and the opposite trend among the elderly. This  
375 trend is likely related to significant disruptions in the living conditions of young people in society and  
376 behavioral changes in adolescents and young adults, which we suggest are likely driven by major  
377 socio-political trends, such as the growth of neoliberal policy, globalization and an expanding tech  
378 industry.<sup>21</sup> The results of this study show that is urgently important that health authorities now see  
379 the need to implement significant political measures to address the underlying trends in mental  
380 health, and their causes, seen in young people.

### 382 **Acknowledgments**

383 The Trøndelag Health Study (HUNT) is a collaboration between HUNT Research Centre (Faculty of  
384 Medicine and Health Sciences, NTNU, Norwegian University of Science and Technology), Nord-  
385 Trøndelag County Council, Central Norway Regional Health Authority, and the Norwegian Institute of  
386 Public Health.

387

## 388 Contributor statement

389 SK was the main author and contributed to the conception and design of the work, acquisition of  
390 data, interpretation of data, drafting and revising it critically for important intellectual content. DAW  
391 contributed to interpretation of data, drafting and revising the work critically for important  
392 intellectual content. MAK contributed to the conception and design, revising the work critically for  
393 important intellectual content, interpretation of data, and revising it critically for important  
394 intellectual content. VR contributed to the acquisition of data, analyses and interpretation of data,  
395 and revising the work critically for important intellectual content. KK contributed to acquisition of  
396 data, interpretation of data, drafting and revising the work critically for important intellectual  
397 content. JMI contributed to acquisition of data, interpretation of data, and revising the work  
398 critically for important intellectual content. OB contributed to acquisition of data, interpretation of  
399 data, and revising the work critically for important intellectual content. JMT contributed to  
400 interpretation of data, drafting and revising the work critically for important intellectual content. ERS  
401 contributed to the conception and design of the work, acquisition of data, analyses and  
402 interpretation of data, drafting and revising it critically for important intellectual content. All authors  
403 approved the final version to be published and are accountable for all aspects of the work. SK accepts  
404 full responsibility for the work and/or the conduct of the study, had access to the data, and  
405 controlled the decision to publish. The corresponding author attests that all listed authors meet  
406 authorship criteria and that no others meeting criteria have been omitted.

407 The Corresponding Author has the right to grant on behalf of all authors and does grant on behalf of  
408 all authors, an exclusive license (or nonexclusive for government employees) on a worldwide basis to  
409 the BMJ Publishing Group Ltd to permit this article (if accepted) to be published in BMJ editions and  
410 any other BMJ PGL products and sublicences such use and exploit all subsidiary rights, as set out in  
411 our license.

## 412 Competing interests

413 All authors have completed the Unified Competing Interest form (available on request from the  
414 corresponding author) and declare: no support from any organisation for the submitted work; no  
415 financial relationships with any organisations that might have an interest in the submitted work in  
416 the previous three years, no other relationships or activities that could appear to have influenced  
417 the submitted work.

## 418 Funding

419 The HUNT Study is publicly funded, and this paper have no external funding. The funding sources  
420 were not involved in the study design; analysis, and interpretation; writing of the report; or the  
421 decision to submit the article for publication. The researchers were independent from funders and  
422 all authors had full access to all of the data (including statistical reports and tables) in the study and  
423 take responsibility for the integrity of the data and the accuracy of the data analysis.

## 424 Data sharing statement

425 Data sharing: The data used is individual-based sensitive health data that can not be made available  
426 without violating the consent and Norwegian law. Data from the Trøndelag Health Study (HUNT) is  
427 available upon reasonable request to the HUNT data access committee (hunt@medisin.ntnu.no).

Manuscript revision\_2 BMJOpen Clean

1  
2  
3 428 The HUNT data access information ([www.ntnu.edu/hunt/data](http://www.ntnu.edu/hunt/data)) describes in detail the policy about  
4 429 data availability.

6 430 Transparency: The lead author (SK) affirms that the manuscript is an honest, accurate, and  
7 431 transparent account of the study being reported; that no important aspects of the study have been  
8 432 omitted; and any discrepancies from the study as planned have been explained.

10 433

## 13 434 References

14 435

- 16 436 1. Global, regional, and national incidence, prevalence, and years lived with disability for 301 acute  
17 437 and chronic diseases and injuries in 188 countries, 1990-2013: a systematic analysis for the  
18 438 Global Burden of Disease Study 2013. *Lancet* 2015;386(9995):743-800. doi: 10.1016/s0140-  
19 439 6736(15)60692-4 [published Online First: 2015/06/13]
- 21 440 2. Patel V, Flisher AJ, Hetrick S, et al. Mental health of young people: a global public-health  
22 441 challenge. *Lancet* 2007;369(9569):1302-13. doi: 10.1016/s0140-6736(07)60368-7 [published  
23 442 Online First: 2007/04/17]
- 24 443 3. Lozano R, Naghavi M, Foreman K, et al. Global and regional mortality from 235 causes of death for  
25 444 20 age groups in 1990 and 2010: a systematic analysis for the Global Burden of Disease  
26 445 Study 2010. *Lancet* 2012;380(9859):2095-128. doi: 10.1016/s0140-6736(12)61728-0  
27 446 [published Online First: 2012/12/19]
- 29 447 4. Murray CJ, Vos T, Lozano R, et al. Disability-adjusted life years (DALYs) for 291 diseases and  
30 448 injuries in 21 regions, 1990-2010: a systematic analysis for the Global Burden of Disease  
31 449 Study 2010. *Lancet* 2012;380(9859):2197-223. doi: 10.1016/s0140-6736(12)61689-4  
32 450 [published Online First: 2012/12/19]
- 33 451 5. Mathers CD, Loncar D. Projections of Global Mortality and Burden of Disease from 2002 to 2030.  
34 452 *PLoS Medicine* 2006;3(11):e442. doi: 10.1371/journal.pmed.0030442
- 35 453 6. Tollånes MC, Knudsen AK, Vollset SE, et al. Disease burden in Norway in 2016. *Tidsskr Nor*  
36 454 *Laegeforen* 2018;138(15) doi: 10.4045/tidsskr.18.0274 [published Online First: 2018/10/03]
- 37 455 7. Knudsen AK, Øverland S, Hotopf M, et al. Lost working years due to mental disorders: an analysis  
38 456 of the Norwegian disability pension registry. *PLoS One* 2012;7(8):e42567. doi:  
39 457 10.1371/journal.pone.0042567 [published Online First: 2012/08/21]
- 41 458 8. Bor W, Dean AJ, Najman J, et al. Are child and adolescent mental health problems increasing in  
42 459 the 21st century? A systematic review. *Aust N Z J Psychiatry* 2014;48(7):606-16. doi:  
43 460 10.1177/0004867414533834 [published Online First: 2014/05/16]
- 44 461 9. Twenge JM, Farley E. Not all screen time is created equal: associations with mental health vary by  
45 462 activity and gender. *Soc Psychiatry Psychiatr Epidemiol* 2021;56(2):207-17. doi:  
46 463 10.1007/s00127-020-01906-9 [published Online First: 2020/08/04]
- 48 464 10. Myhr A, Anthun KS, Lillefjell M, et al. Trends in Socioeconomic Inequalities in Norwegian  
49 465 Adolescents' Mental Health From 2014 to 2018: A Repeated Cross-Sectional Study. *Front*  
50 466 *Psychol* 2020;11:1472. doi: 10.3389/fpsyg.2020.01472 [published Online First: 2020/08/01]
- 51 467 11. Twenge JM. Why increases in adolescent depression may be linked to the technological  
52 468 environment. *Curr Opin Psychol* 2020;32:89-94. doi: 10.1016/j.copsyc.2019.06.036  
53 469 [published Online First: 2019/08/16]
- 54 470 12. Twenge JM, Cooper AB, Joiner TE, et al. Age, period, and cohort trends in mood disorder  
55 471 indicators and suicide-related outcomes in a nationally representative dataset, 2005-2017. *J*  
56 472 *Abnorm Psychol* 2019;128(3):185-99. doi: 10.1037/abn0000410 [published Online First:  
57 473 2019/03/15]

Manuscript revision\_2 BMJOpen Clean

- 1  
2  
3 474 13. Keyes KM, Gary D, O'Malley PM, et al. Recent increases in depressive symptoms among US  
4 475 adolescents: trends from 1991 to 2018. *Soc Psychiatry Psychiatr Epidemiol* 2019;54(8):987-  
5 476 96. doi: 10.1007/s00127-019-01697-8 [published Online First: 2019/04/01]  
6 477  
7 478 14. Thomas ML, Kaufmann CN, Palmer BW, et al. Paradoxical Trend for Improvement in Mental  
8 478 Health With Aging: A Community-Based Study of 1,546 Adults Aged 21-100 Years. *J Clin*  
9 479 *Psychiatry* 2016;77(8):e1019-25. doi: 10.4088/JCP.16m10671 [published Online First:  
10 480 2016/08/26]  
11 481 15. Zivin K, Pirraglia PA, McCammon RJ, et al. Trends in depressive symptom burden among older  
12 482 adults in the United States from 1998 to 2008. *J Gen Intern Med* 2013;28(12):1611-9. doi:  
13 483 10.1007/s11606-013-2533-y [published Online First: 2013/07/10]  
14 484 16. Braveman P, Gottlieb L. The social determinants of health: it's time to consider the causes of the  
15 485 causes. *Public Health Rep* 2014;129 Suppl 2(Suppl 2):19-31. doi:  
16 486 10.1177/00333549141291s206 [published Online First: 2014/01/05]  
17 487 17. Rose G. Sick individuals and sick populations. *Int J Epidemiol* 2001;30(3):427-32; discussion 33-4.  
18 488 doi: 10.1093/ije/30.3.427 [published Online First: 2001/06/21]  
19 489 18. Ostry JD, Loungani P, Furceri D. Neoliberalism: oversold. *Finance & development* 2016;53(2):38-  
20 490 41.  
21 491 19. Harari YN. 21 lessons for the 21st century. London: Vintage Books 2019.  
22 492 20. Zuboff S. The age of surveillance capitalism : the fight for the future at the new frontier of power.  
23 493 London,New York: Profile Books PublicAffairs 2019.  
24 494 21. Harari YN. Homo Deus: A brief history of tomorrow: Random House 2016.  
25 495 22. Harris T. How technology hijacks people's minds—from a magician and Google's design ethicist.  
26 496 *Medium Magazine* 2016  
27 497 23. Creativity C. Top 9 trends of global culture during the last 15 years *Culture & Creativity*; 2021  
28 498 [Available from: [https://www.culturepartnership.eu/en/article/top-9-trends-of-the-last-](https://www.culturepartnership.eu/en/article/top-9-trends-of-the-last-decade)  
29 499 [decade](https://www.culturepartnership.eu/en/article/top-9-trends-of-the-last-decade) accessed 08.02. 2021.  
30 500 24. Lin LY, Sidani JE, Shensa A, et al. ASSOCIATION BETWEEN SOCIAL MEDIA USE AND DEPRESSION  
31 501 AMONG U.S. YOUNG ADULTS. *Depress Anxiety* 2016;33(4):323-31. doi: 10.1002/da.22466  
32 502 [published Online First: 2016/01/20]  
33 503 25. Keles B, McCrae N, Grealish A. A systematic review: the influence of social media on depression,  
34 504 anxiety and psychological distress in adolescents. *International Journal of Adolescence and*  
35 505 *Youth* 2020;25(1):79-93. doi: 10.1080/02673843.2019.1590851  
36 506 26. Korpås JA. Screen time associated to mental health in adolescents: Knowledge from a population  
37 507 based study. Norwegian University of Science and Technology, 2020.  
38 508 27. Dwyer RJ, Kushlev K, Dunn EW. Smartphone use undermines enjoyment of face-to-face social  
39 509 interactions. *Journal of experimental social psychology* 2018;78:233-39. doi:  
40 510 10.1016/j.jesp.2017.10.007  
41 511 28. Kim J-H. Longitudinal Associations Among Psychological Issues and Problematic Use of  
42 512 Smartphones: A Two-Wave Cross-Lagged Study. *Journal of media psychology*  
43 513 2019;31(3):117-27. doi: 10.1027/1864-1105/a000234  
44 514 29. Keyes KM, Maslowsky J, Hamilton A, et al. The great sleep recession: changes in sleep duration  
45 515 among US adolescents, 1991-2012. *Pediatrics* 2015;135(3):460-8. doi: 10.1542/peds.2014-  
46 516 2707 [published Online First: 2015/02/18]  
47 517 30. Twenge JM, Krizan Z, Hisler G. Decreases in self-reported sleep duration among U.S. adolescents  
48 518 2009-2015 and association with new media screen time. *Sleep Med* 2017;39:47-53. doi:  
49 519 10.1016/j.sleep.2017.08.013 [published Online First: 2017/11/22]  
50 520 31. Hestetun I, Svendsen MV, Oellingrath IM. Sleep problems and mental health among young  
51 521 Norwegian adolescents. *Nord J Psychiatry* 2018;72(8):578-85. doi:  
52 522 10.1080/08039488.2018.1499043 [published Online First: 2018/10/10]  
53  
54  
55  
56  
57  
58  
59  
60

Manuscript revision\_2 BMJOpen Clean

- 1  
2  
3 523 32. Pascoe MC, Hetrick SE, Parker AG. The impact of stress on students in secondary school and  
4 524 higher education. *International Journal of Adolescence and Youth* 2020;25(1):104-12. doi:  
5 525 10.1080/02673843.2019.1596823  
6  
7 526 33. Cosma A, Stevens G, Martin G, et al. Cross-National Time Trends in Adolescent Mental Well-  
8 527 Being From 2002 to 2018 and the Explanatory Role of Schoolwork Pressure. *J Adolesc Health*  
9 528 2020;66(6s):S50-s58. doi: 10.1016/j.jadohealth.2020.02.010 [published Online First:  
10 529 2020/05/25]  
11 530 34. Hellevik O, Hellevik T. Hvorfor ser færre unge lyst på livet? Utviklingen for opplevd livskvalitet  
12 531 blant ungdom og yngre voksne i Norge. *Nordisk Tidsskrift for Ungdomsforskning* 2021;2:104-  
13 532 28. doi: 10.18261/issn.2535-8162-2021-02-02  
14 533 35. Krokstad S, Langhammer A, Hveem K, et al. Cohort Profile: the HUNT Study, Norway. *Int J*  
15 534 *Epidemiol* 2013;42(4):968-77. doi: 10.1093/ije/dys095 [published Online First: 2012/08/11]  
16 535 36. Holmen TL, Bratberg G, Krokstad S, et al. Cohort profile of the Young-HUNT Study, Norway: a  
17 536 population-based study of adolescents. *Int J Epidemiol* 2014;43(2):536-44. doi:  
18 537 10.1093/ije/dys232 [published Online First: 2013/02/06]  
19 538 37. Schmalbach B, Zenger M, Tibubos AN, et al. Psychometric Properties of Two Brief Versions of the  
20 539 Hopkins Symptom Checklist: HSCL-5 and HSCL-10. *Assessment* 2019;1073191119860910.  
21 540 doi: 10.1177/1073191119860910 [published Online First: 2019/07/06]  
22 541 38. Strand BH, Dalgard OS, Tambs K, et al. Measuring the mental health status of the Norwegian  
23 542 population: a comparison of the instruments SCL-25, SCL-10, SCL-5 and MHI-5 (SF-36). *Nord J*  
24 543 *Psychiatry* 2003;57(2):113-8. doi: 10.1080/08039480310000932 [published Online First:  
25 544 2003/05/15]  
26 545 39. Bjelland I, Dahl AA, Haug TT, et al. The validity of the Hospital Anxiety and Depression Scale. An  
27 546 updated literature review. *J Psychosom Res* 2002;52(2):69-77. doi: 10.1016/s0022-  
28 547 3999(01)00296-3 [published Online First: 2002/02/08]  
29 548 40. Stata Statistical Software: Release 16. [program]. College Station, TX: StataCorp LLC, 2019.  
30 549 41. Hartz I, Skurtveit S, Steffenak AKM, et al. Psychotropic drug use among 0–17 year olds during  
31 550 2004–2014: a nationwide prescription database study. *BMC Psychiatry* 2016;16(1):12. doi:  
32 551 10.1186/s12888-016-0716-x  
33 552 42. Wæhre A, Schorkopf M. Gender variance, medical treatment and our responsibility. *Tidsskr Nor*  
34 553 *Laegeforen* 2019;139(7) doi: 10.4045/tidsskr.19.0178 [published Online First: 2019/04/11]  
35 554 43. Furu K, Hjellevik V, Hartz I, et al. Legemiddelbruk hos barn og unge i Norge 2008-2017. Oslo:  
36 555 Folkehelseinstituttet, 2018.  
37 556 44. Kaltenbrunner Bernitz B, Grees N, Jakobsson Randers M, et al. Young adults on disability benefits  
38 557 in 7 countries. *Scand J Public Health* 2013;41(12 Suppl):3-26. doi:  
39 558 10.1177/1403494813496931 [published Online First: 2013/10/18]  
40 559 45. Mercado MC, Holland K, Leemis RW, et al. Trends in Emergency Department Visits for Nonfatal  
41 560 Self-inflicted Injuries Among Youth Aged 10 to 24 Years in the United States, 2001-2015.  
42 561 *Jama* 2017;318(19):1931-33. doi: 10.1001/jama.2017.13317 [published Online First:  
43 562 2017/11/23]  
44 563 46. Plemmons G, Hall M, Douppnik S, et al. Hospitalization for Suicide Ideation or Attempt: 2008-  
45 564 2015. *Pediatrics* 2018;141(6) doi: 10.1542/peds.2017-2426 [published Online First:  
46 565 2018/05/18]  
47 566 47. Strand BH, Steingrimsdóttir Ó A, Grøholt EK, et al. Trends in educational inequalities in cause  
48 567 specific mortality in Norway from 1960 to 2010: a turning point for educational inequalities  
49 568 in cause specific mortality of Norwegian men after the millennium? *BMC Public Health*  
50 569 2014;14:1208. doi: 10.1186/1471-2458-14-1208 [published Online First: 2014/11/25]  
51 570 48. Saura JR, Palacios-Marqués D, Iturricha-Fernández A. Ethical design in social media: Assessing the  
52 571 main performance measurements of user online behavior modification. *Journal of Business*  
53 572 *Research* 2021;129:271-81. doi: <https://doi.org/10.1016/j.jbusres.2021.03.001>  
54  
55  
56  
57  
58  
59  
60

Manuscript revision\_2 BMJOpen Clean

- 1  
2  
3 573 49. Burr C, Taddeo M, Floridi L. The ethics of digital well-being: A thematic review. *Science and*  
4 574 *engineering ethics* 2020;26(4):2313-43.
- 5 575 50. Twenge JM, Campbell WK. Media Use Is Linked to Lower Psychological Well-Being: Evidence  
6 576 from Three Datasets. *Psychiatr Q* 2019;90(2):311-31. doi: 10.1007/s11126-019-09630-7  
7 577 [published Online First: 2019/03/13]
- 8 578 51. Coyne SM, Rogers AA, Zurcher JD, et al. Does time spent using social media impact mental  
9 579 health?: An eight year longitudinal study. *Computers in human behavior* 2020;104:106160.  
10 580 doi: 10.1016/j.chb.2019.106160
- 11 581 52. Verhaeghe P. What about me? The struggle for identity in a market-based society. London:  
12 582 Scribe Publications Pty Ltd 2014.
- 13 583 53. Røgeberg O. Fire av fem nordmenn bruker sosiale medier (Four out of five Norwegians use social  
14 584 media) Oslo: Statistics Norway; 2018 [Available from: [https://www.ssb.no/teknologi-og-](https://www.ssb.no/teknologi-og-innovasjon/artikler-og-publikasjoner/fire-av-fem-nordmenn-bruker-sosiale-medier)  
15 585 [innovasjon/artikler-og-publikasjoner/fire-av-fem-nordmenn-bruker-sosiale-medier](https://www.ssb.no/teknologi-og-innovasjon/artikler-og-publikasjoner/fire-av-fem-nordmenn-bruker-sosiale-medier) accessed  
16 586 13. Apr 2022.
- 17 587 54. Thompson S, Cylus J, Evenovits T. Can people afford to pay for health care? New evidence on  
18 588 financial protection in Europe. Copenhagen, 2019.
- 19 589 55. Storeng SH, Krokstad S, Westin S, et al. Decennial trends and inequalities in healthy life  
20 590 expectancy: The HUNT Study, Norway. *Scand J Public Health* 2018;46(1):124-31. doi:  
21 591 10.1177/1403494817695911 [published Online First: 2017/12/02]
- 22 592 56. Worthy DA, Gorlick MA, Pacheco JL, et al. With age comes wisdom: decision making in younger  
23 593 and older adults. *Psychol Sci* 2011;22(11):1375-80. doi: 10.1177/0956797611420301  
24 594 [published Online First: 2011/10/01]
- 25 595 57. Krokstad S, Westin S. Disability in society-medical and non-medical determinants for disability  
26 596 pension in a Norwegian total county population study. *Soc Sci Med* 2004;58(10):1837-48.  
27 597 doi: 10.1016/s0277-9536(03)00409-x [published Online First: 2004/03/17]
- 28 598 58. Trends in adult body-mass index in 200 countries from 1975 to 2014: a pooled analysis of 1698  
29 599 population-based measurement studies with 19.2 million participants. *Lancet*  
30 600 2016;387(10026):1377-96. doi: 10.1016/s0140-6736(16)30054-x [published Online First:  
31 601 2016/04/27]
- 32 602 59. Langhammer A, Krokstad S, Romundstad P, et al. The HUNT study: participation is associated  
33 603 with survival and depends on socioeconomic status, diseases and symptoms. *BMC Med Res*  
34 604 *Methodol* 2012;12:143. doi: 10.1186/1471-2288-12-143 [published Online First: 2012/09/18]
- 35 605 60. Weiss D. Round hole, square peg: a discourse analysis of social inequalities and the political  
36 606 legitimization of health technology in Norway. *BMC Public Health* 2019;19(1):1691. doi:  
37 607 10.1186/s12889-019-8023-3 [published Online First: 2019/12/18]
- 38 608 61. Kickbusch I. Addressing the interface of the political and commercial determinants of health.  
39 609 *Health Promot Int* 2012;27(4):427-8. doi: 10.1093/heapro/das057 [published Online First:  
40 610 2012/11/13]
- 41 611 62. McKee M, Stuckler D. Revisiting the Corporate and Commercial Determinants of Health. *Am J*  
42 612 *Public Health* 2018;108(9):1167-70. doi: 10.2105/ajph.2018.304510 [published Online First:  
43 613 2018/07/20]
- 44 614 63. Pape K, Bjørngaard JH, Holmen TL, et al. The welfare burden of adolescent anxiety and  
45 615 depression: a prospective study of 7500 young Norwegians and their families: the HUNT  
46 616 study. *BMJ Open* 2012;2(6) doi: 10.1136/bmjopen-2012-001942 [published Online First:  
47 617 2012/11/13]

618



# HUNT

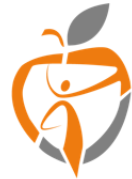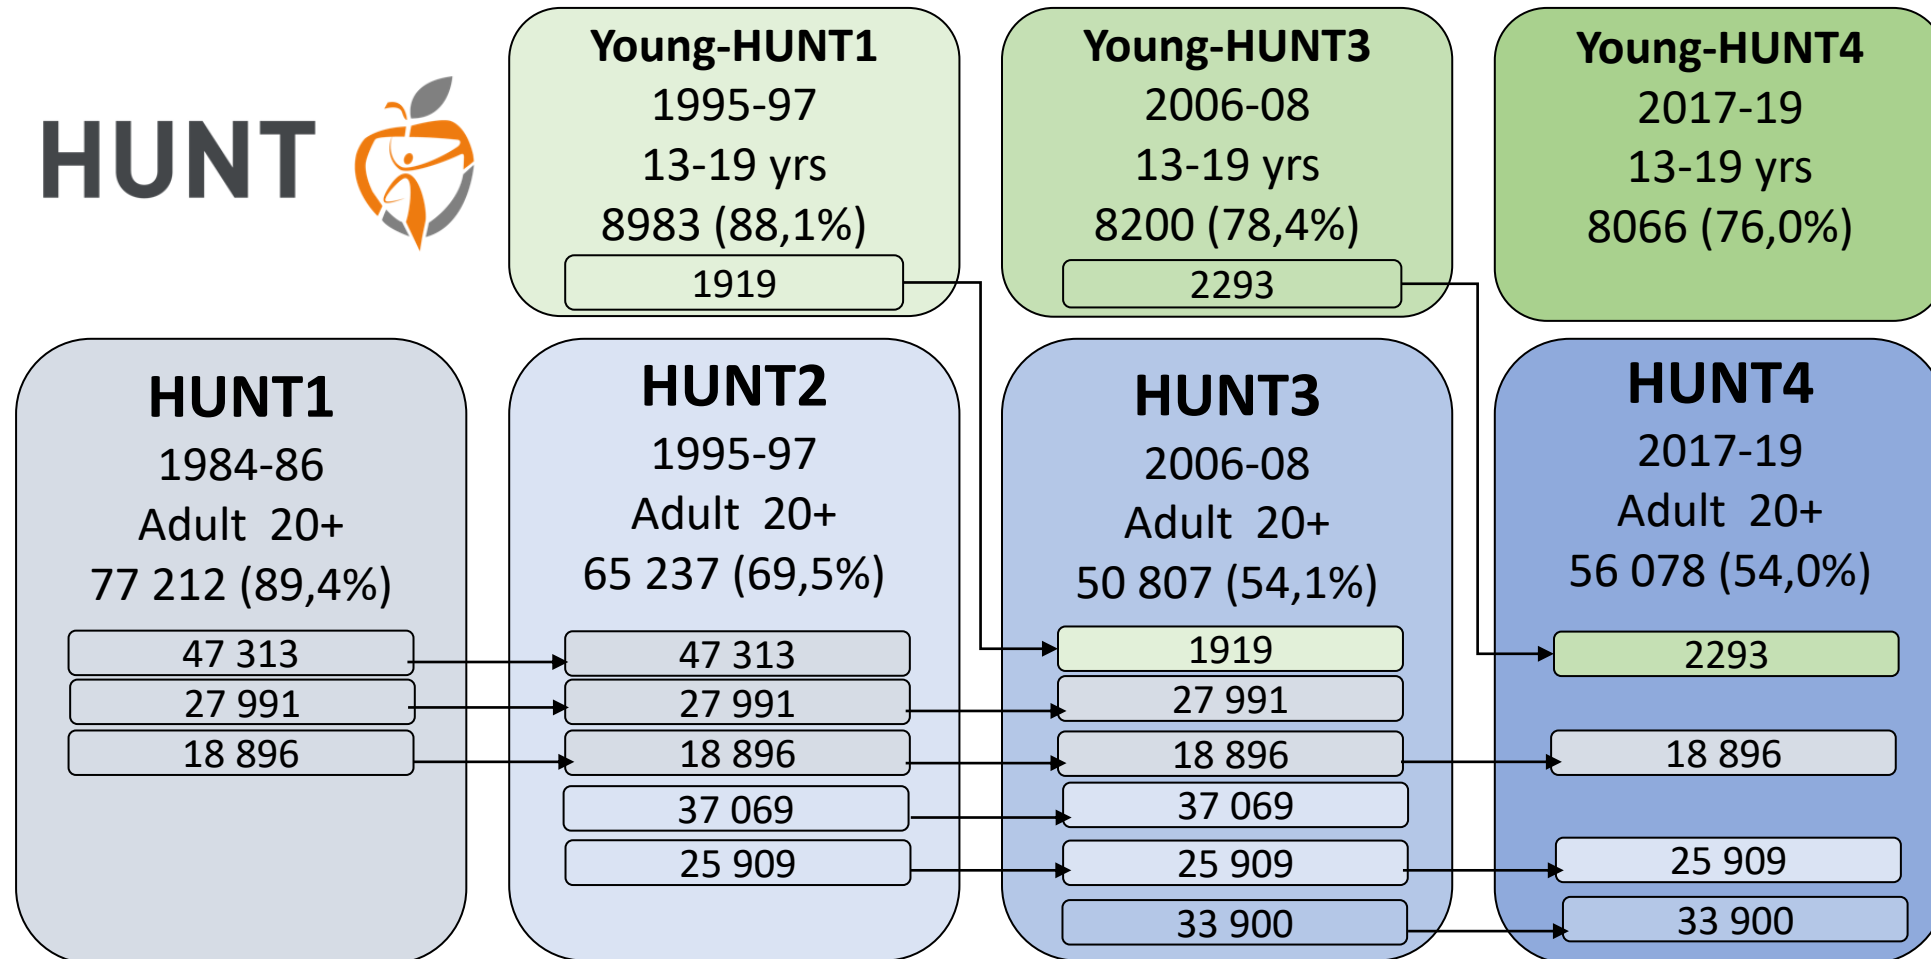

1  
2  
3  
4  
5  
6  
7  
8  
9  
10  
11  
12  
13  
14  
15  
16  
17  
18  
19  
20  
21  
22  
23  
24  
25  
26  
27  
28  
29  
30  
31  
32  
33  
34  
35  
36  
37  
38  
39  
40  
41

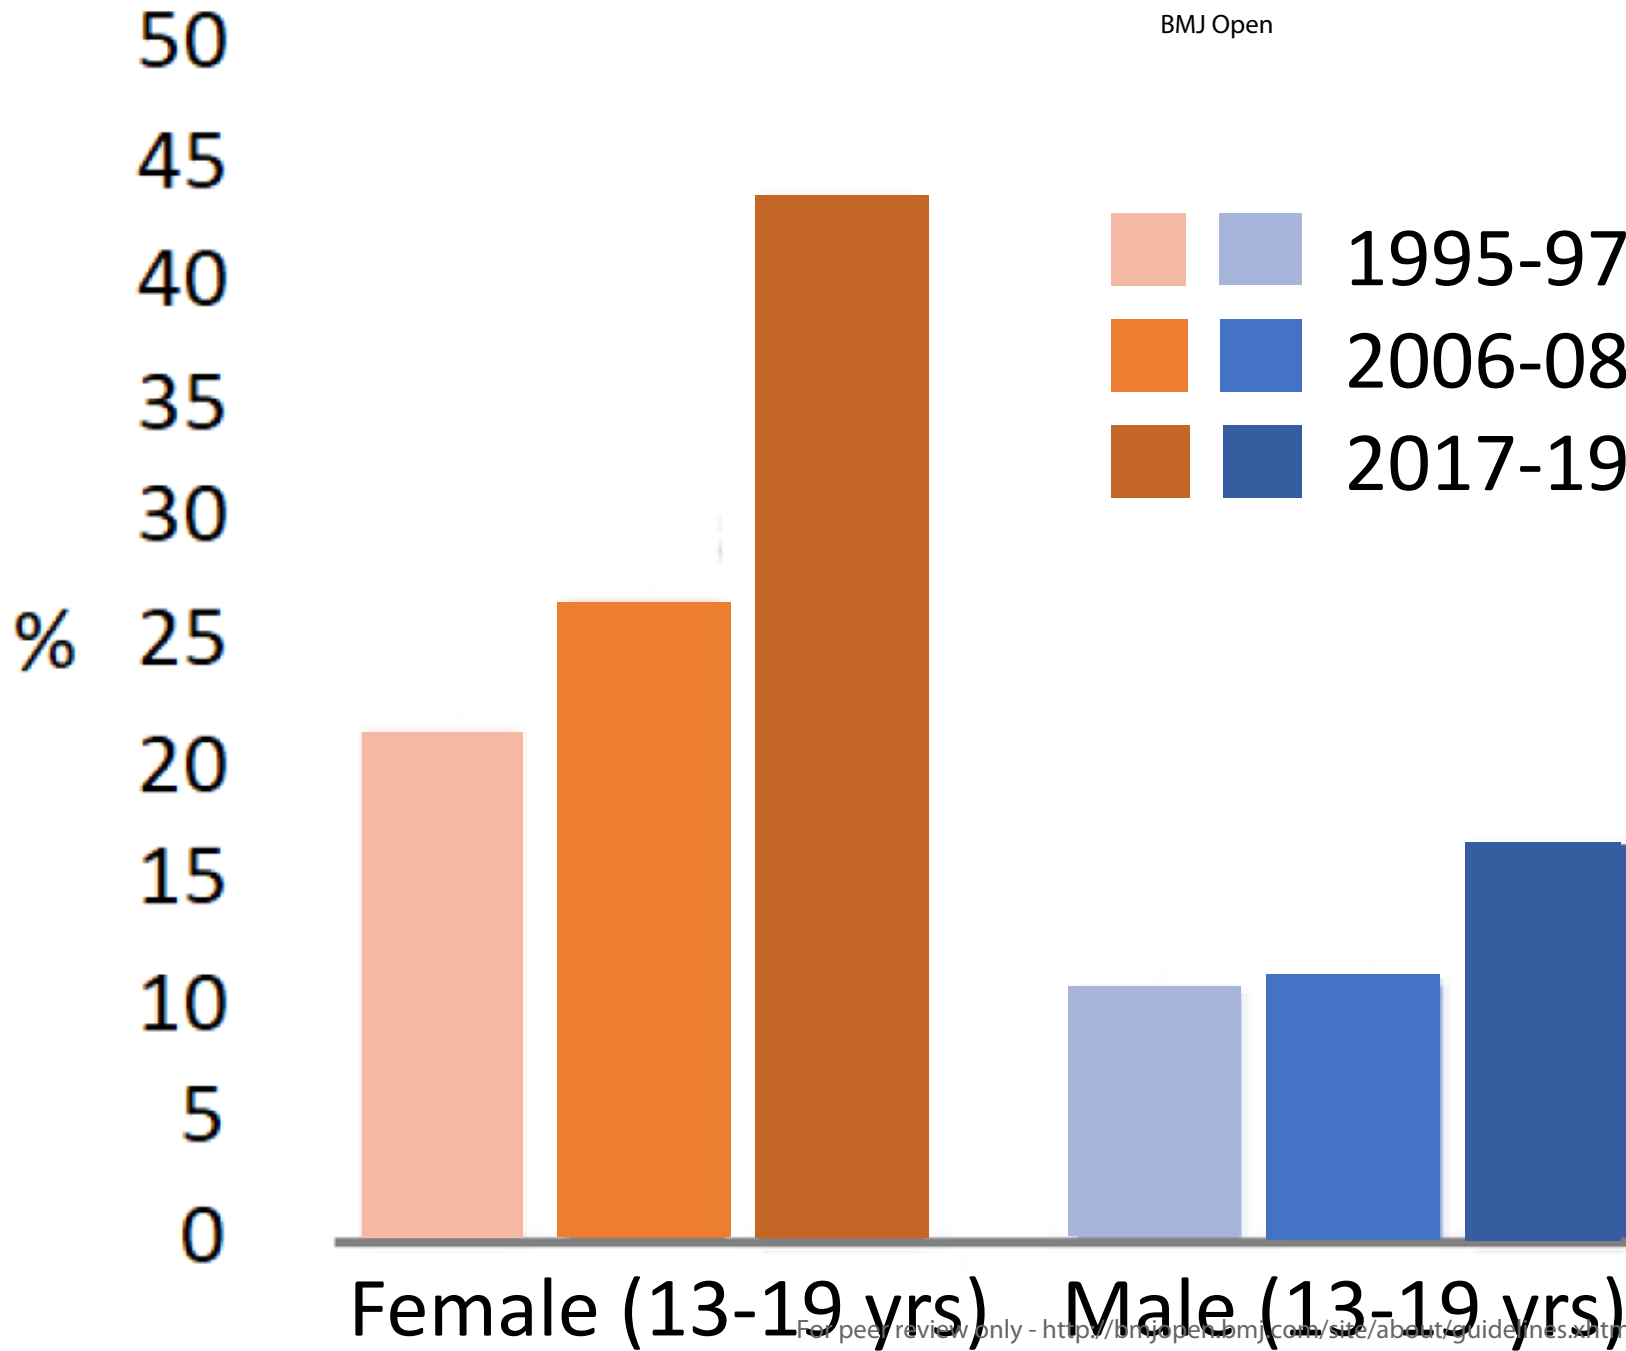

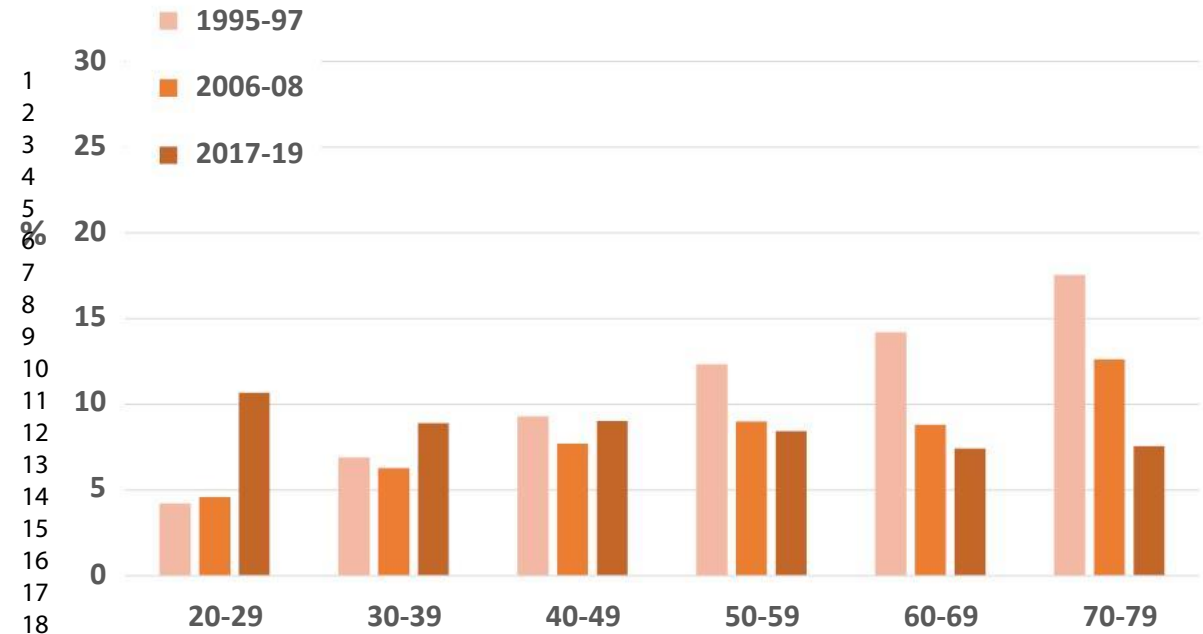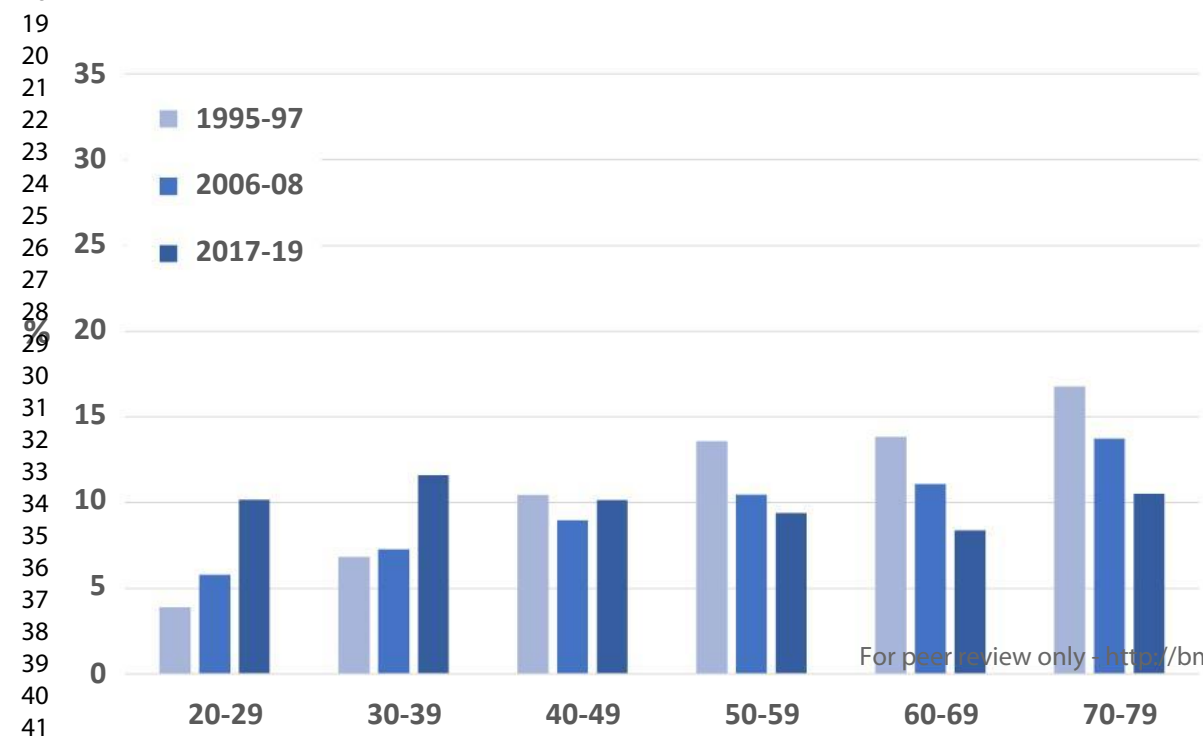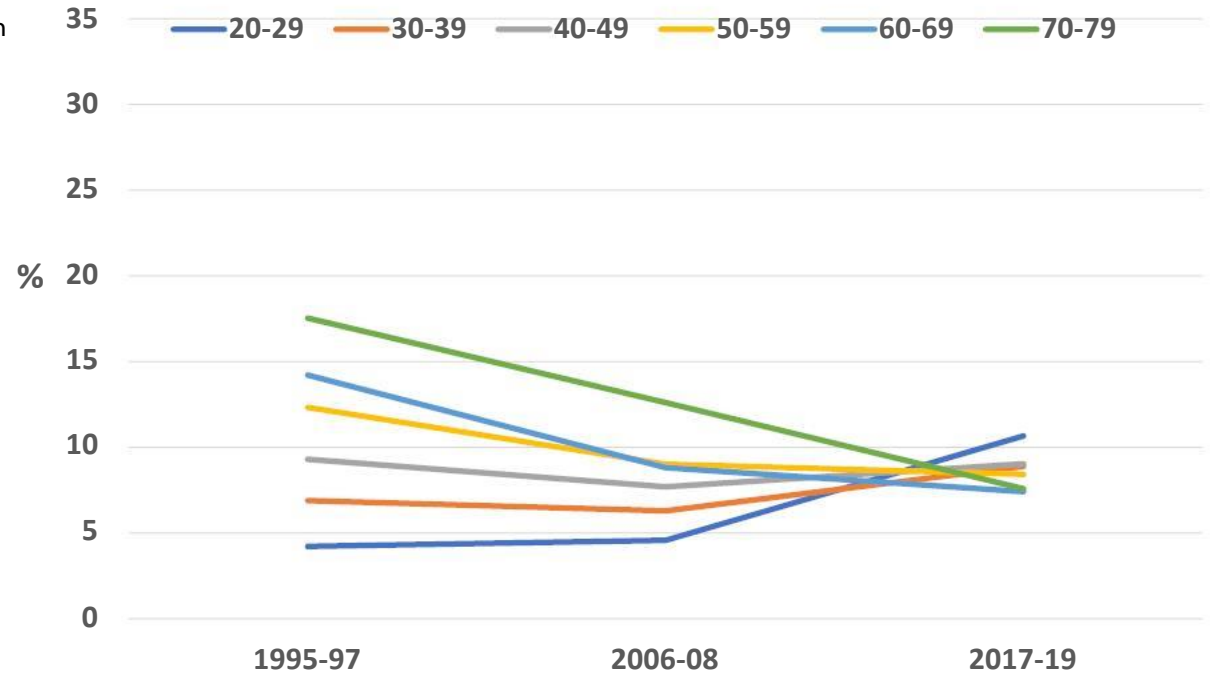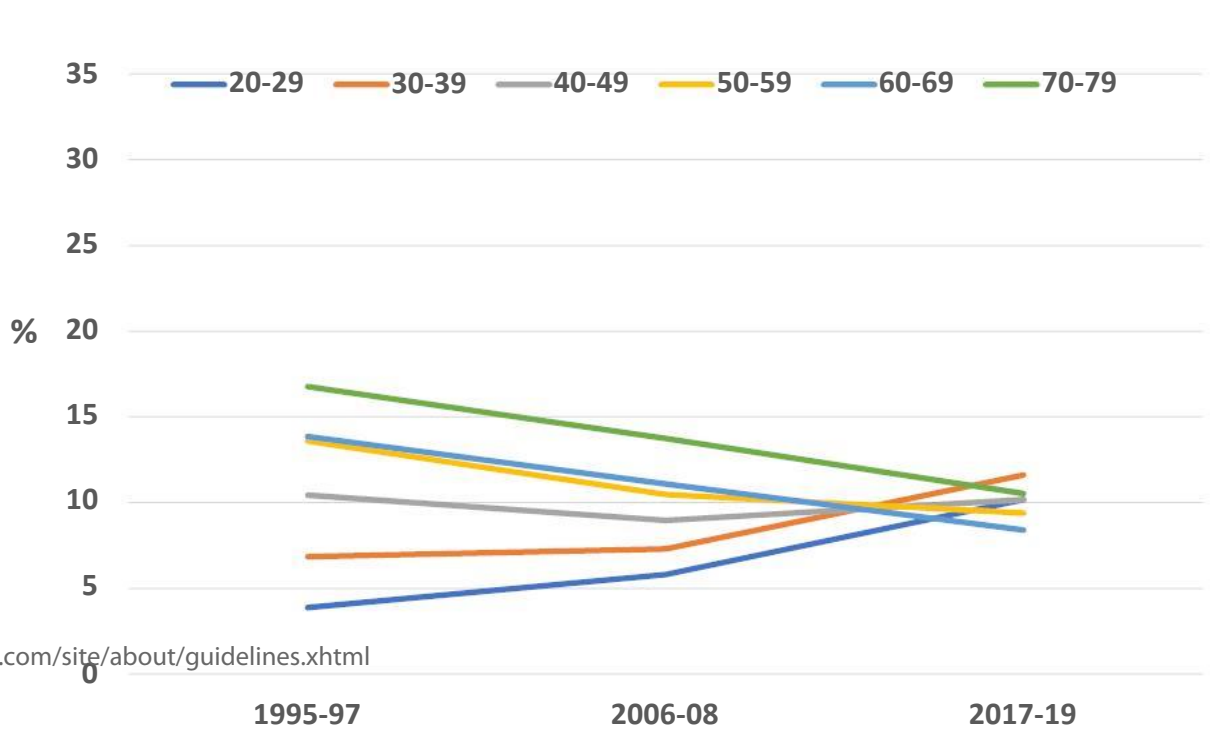

1  
2  
3  
4  
5  
6  
7  
8  
9  
10  
11  
12  
13  
14  
15  
16  
17  
18  
19  
20  
21  
22  
23  
24  
25  
26  
27  
28  
29  
30  
31  
32  
33  
34  
35  
36  
37  
38  
39  
40  
41

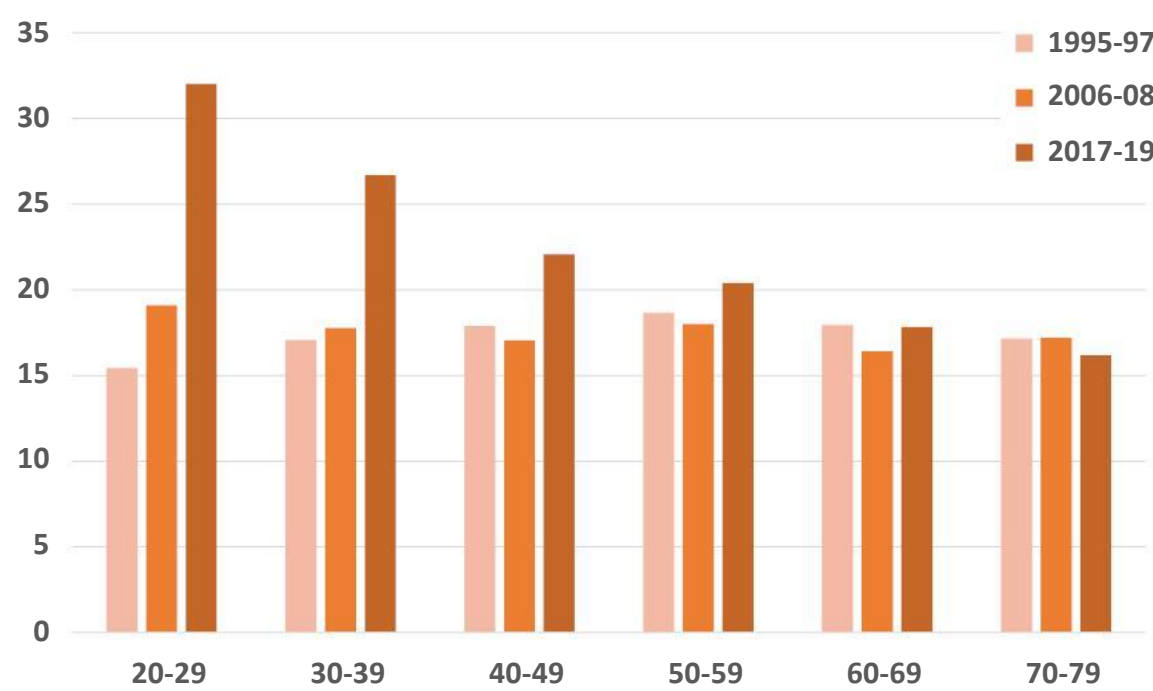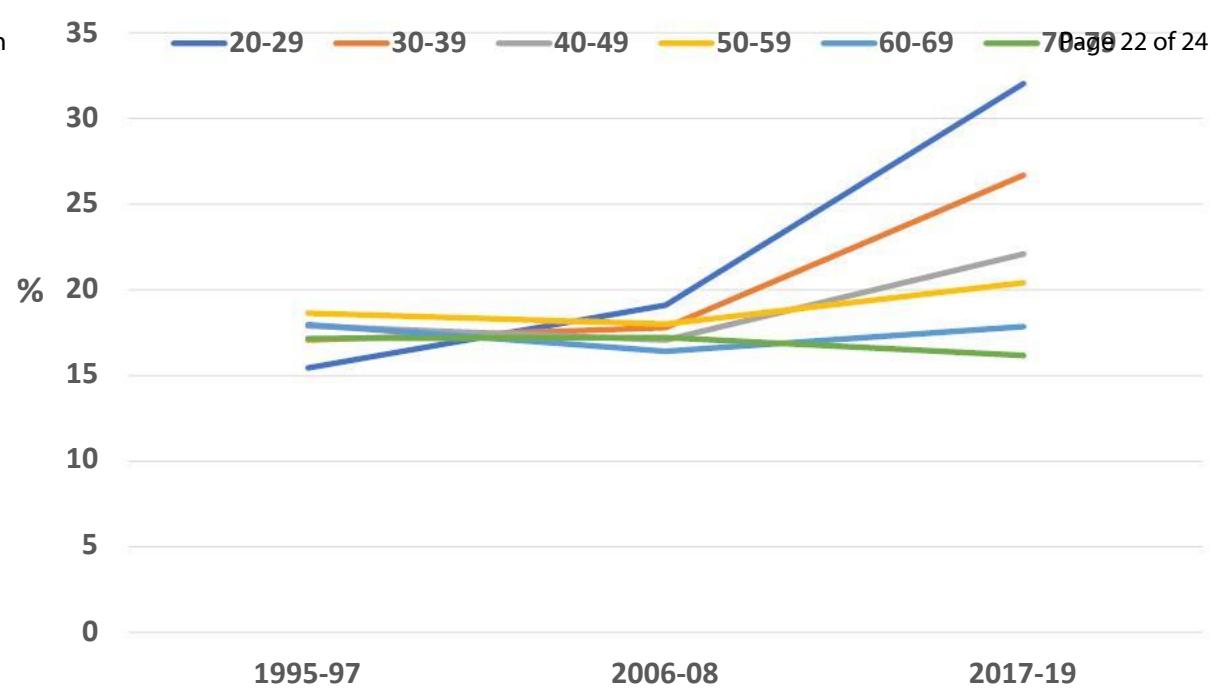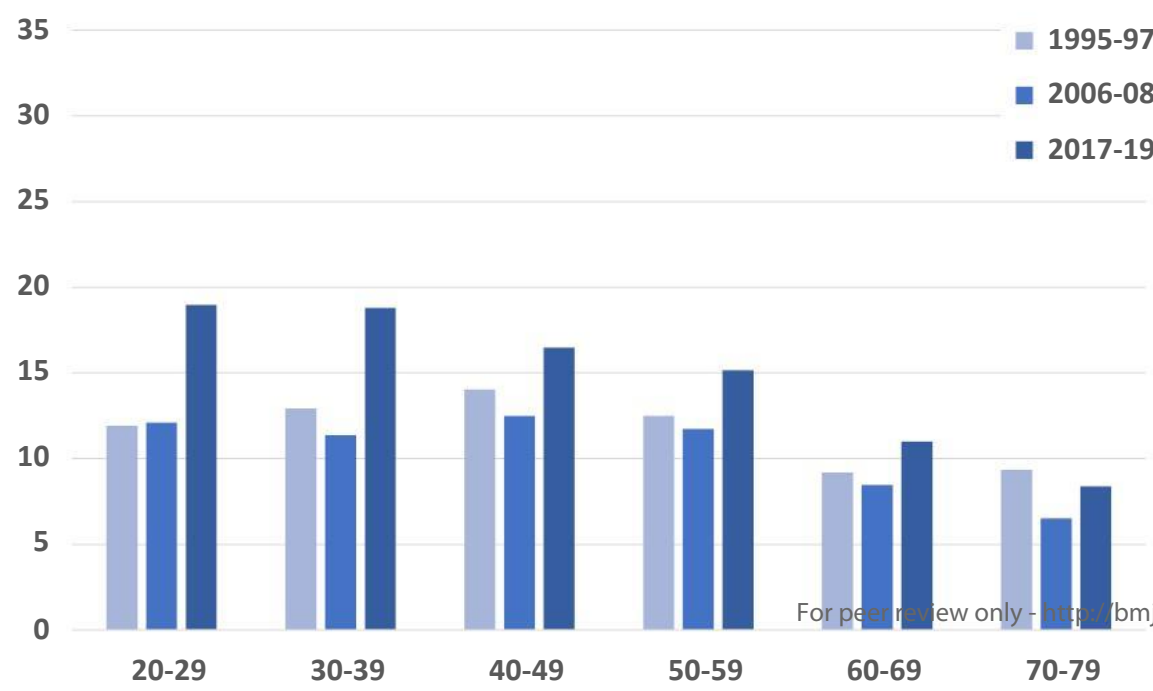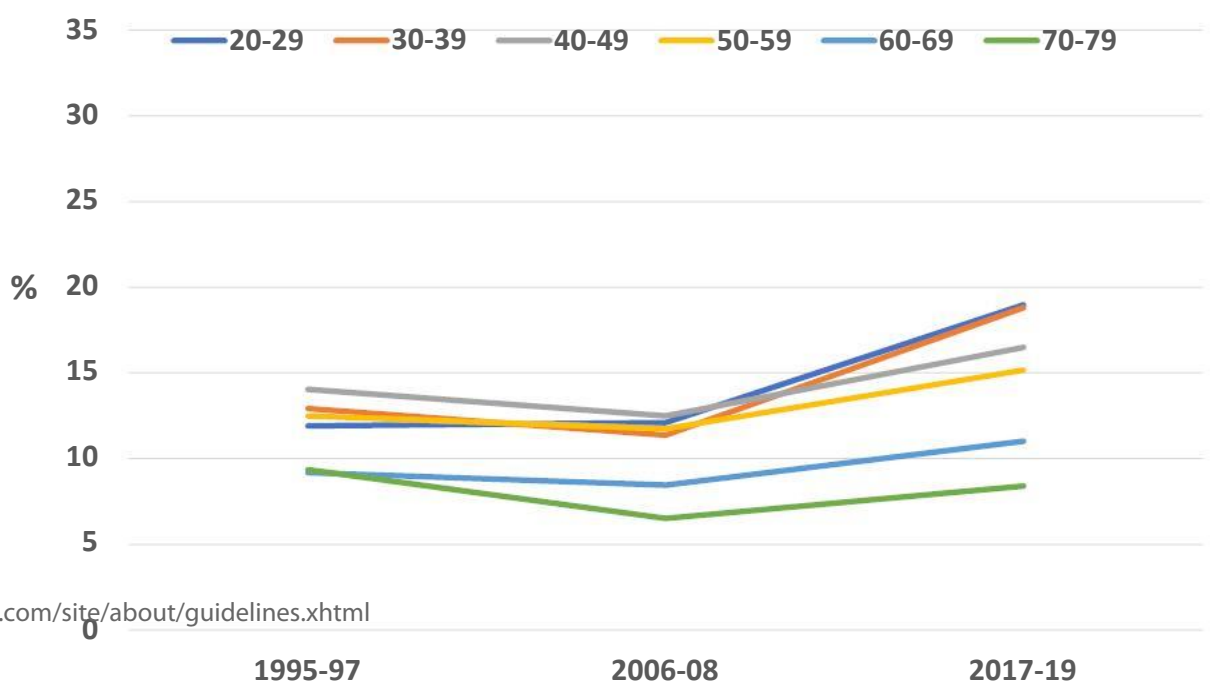

## Appendix table 1

Appendix table 1. Prevalence (%) and 95 percent confidence interval (95% CI) for symptoms of poor mental health by age group and sex.

|                 |       | HUNT2        |               | HUNT3         |               | HUNT4         |               | P-value<br>for trend |       |
|-----------------|-------|--------------|---------------|---------------|---------------|---------------|---------------|----------------------|-------|
|                 |       | Prevalence   | 95% CI        | Prevalence    | 95% CI        | Prevalence    | 95% CI        |                      |       |
| HADS depression |       |              |               |               |               |               |               |                      |       |
| Women           | 20-29 | 4.2          | (3.7 - 4.8)   | 4.6           | (3.7 - 5.7)   | 10.7          | (9.5 - 12.0)  | 0.000                |       |
|                 | 30-39 | 6.9          | (6.3 - 7.6)   | 6.3           | (5.5 - 7.2)   | 8.9           | (7.9 - 10.1)  | 0.004                |       |
|                 | 40-49 | 9.3          | (8.6 - 10.0)  | 7.7           | (6.9 - 8.5)   | 9.0           | (8.2 - 10.0)  | 0.377                |       |
|                 | 50-59 | 12.3         | (11.5 - 13.3) | 9.0           | (8.3 - 9.9)   | 8.4           | (7.7 - 9.3)   | 0.000                |       |
|                 | 60-69 | 14.2         | (13.2 - 15.3) | 8.8           | (8.0 - 9.7)   | 7.4           | (6.7 - 8.2)   | 0.000                |       |
| Men             | 70-79 | 17.5         | (16.3 - 18.9) | 12.6          | (11.4 - 14.0) | 7.6           | (6.8 - 8.5)   | 0.000                |       |
|                 | 20-29 | 3.9          | (3.3 - 4.5)   | 5.8           | (4.5 - 7.4)   | 10.2          | (8.7 - 11.9)  | 0.000                |       |
|                 | 30-39 | 6.9          | (6.2 - 7.6)   | 7.3           | (6.2 - 8.6)   | 11.6          | (10.2 - 13.2) | 0.000                |       |
|                 | 40-49 | 10.4         | (9.7 - 11.2)  | 9.0           | (8.0 - 10.0)  | 10.2          | (9.0 - 11.4)  | 0.358                |       |
|                 | 50-59 | 13.6         | (12.7 - 14.6) | 10.5          | (9.6 - 11.4)  | 9.4           | (8.5 - 10.4)  | 0.000                |       |
| HADS anxiety    | 60-69 | 13.9         | (12.8 - 15.0) | 11.1          | (10.2 - 12.1) | 8.4           | (7.6 - 9.3)   | 0.000                |       |
|                 | 70-79 | 16.8         | (15.4 - 18.2) | 13.7          | (12.4 - 15.2) | 10.5          | (9.5 - 11.6)  | 0.000                |       |
|                 | Women | 20-29        | 15.5          | (14.4 - 16.5) | 19.1          | (17.4 - 21.0) | 32.0          | (30.1 - 33.9)        | 0.000 |
|                 |       | 30-39        | 17.1          | (16.1 - 18.1) | 17.8          | (16.5 - 19.2) | 26.7          | (25.1 - 28.4)        | 0.000 |
|                 |       | 40-49        | 17.9          | (17.0 - 18.9) | 17.1          | (16.0 - 18.2) | 22.1          | (20.8 - 23.4)        | 0.000 |
| 50-59           |       | 18.6         | (17.5 - 19.8) | 18.0          | (17.0 - 19.1) | 20.4          | (19.3 - 21.6) | 0.028                |       |
| 60-69           |       | 18.0         | (16.7 - 19.3) | 16.4          | (15.4 - 17.6) | 17.9          | (16.8 - 19.0) | 0.896                |       |
| Men             | 70-79 | 17.2         | (15.7 - 18.8) | 17.2          | (15.8 - 18.8) | 16.2          | (15.0 - 17.4) | 0.290                |       |
|                 | 20-29 | 11.9         | (10.9 - 13.0) | 12.0          | (10.2 - 14.2) | 19.0          | (17.0 - 21.2) | 0.000                |       |
|                 | 30-39 | 12.9         | (12.0 - 13.9) | 11.4          | (10.0 - 12.9) | 18.8          | (17.0 - 20.7) | 0.000                |       |
|                 | 40-49 | 14.0         | (13.2 - 15.0) | 12.5          | (11.4 - 13.7) | 16.5          | (15.1 - 18.0) | 0.030                |       |
|                 | 50-59 | 12.5         | (11.6 - 13.5) | 11.7          | (10.8 - 12.7) | 15.2          | (14.0 - 16.4) | 0.001                |       |
| 60-69           | 9.2   | (8.3 - 10.2) | 8.5           | (7.6 - 9.4)   | 11.0          | (10.1 - 12.0) | 0.004         |                      |       |
|                 | 70-79 | 9.4          | (8.2 - 10.6)  | 6.5           | (5.6 - 7.6)   | 8.4           | (7.5 - 9.4)   | 0.325                |       |

STROBE Statement—Checklist of items that should be included in reports of *cross-sectional studies*

The following recommendations were followed if applicable for the manuscript: Paradoxical trends in mental health in the society and the root causes of increased mental health problems among young people. The HUNT Study, Norway.

|                           | Item No | Recommendation                                                                                                                                                                                    | Page in manus. |
|---------------------------|---------|---------------------------------------------------------------------------------------------------------------------------------------------------------------------------------------------------|----------------|
| <b>Title and abstract</b> | 1       | (a) Indicate the study's design with a commonly used term in the title or the abstract                                                                                                            | 2              |
|                           |         | (b) Provide in the abstract an informative and balanced summary of what was done and what was found                                                                                               | 2              |
| <b>Introduction</b>       |         |                                                                                                                                                                                                   |                |
| Background/rationale      | 2       | Explain the scientific background and rationale for the investigation being reported                                                                                                              | 3              |
| Objectives                | 3       | State specific objectives, including any prespecified hypotheses                                                                                                                                  | 4              |
| <b>Methods</b>            |         |                                                                                                                                                                                                   |                |
| Study design              | 4       | Present key elements of study design early in the paper                                                                                                                                           | 4-5            |
| Setting                   | 5       | Describe the setting, locations, and relevant dates, including periods of recruitment, exposure, follow-up, and data collection                                                                   | 4              |
| Participants              | 6       | (a) Give the eligibility criteria, and the sources and methods of selection of participants                                                                                                       | 4              |
| Variables                 | 7       | Clearly define all outcomes, exposures, predictors, potential confounders, and effect modifiers. Give diagnostic criteria, if applicable                                                          | 4-5            |
| Data sources/measurement  | 8*      | For each variable of interest, give sources of data and details of methods of assessment (measurement). Describe comparability of assessment methods if there is more than one group              | 4-5            |
| Bias                      | 9       | Describe any efforts to address potential sources of bias                                                                                                                                         | 11             |
| Study size                | 10      | Explain how the study size was arrived at                                                                                                                                                         | 4              |
| Quantitative variables    | 11      | Explain how quantitative variables were handled in the analyses. If applicable, describe which groupings were chosen and why                                                                      | 4              |
| Statistical methods       | 12      | (a) Describe all statistical methods, including those used to control for confounding                                                                                                             | 4              |
|                           |         | (b) Describe any methods used to examine subgroups and interactions                                                                                                                               | 4              |
|                           |         | (c) Explain how missing data were addressed                                                                                                                                                       | 5-6            |
|                           |         | (d) If applicable, describe analytical methods taking account of sampling strategy                                                                                                                | Na             |
|                           |         | (e) Describe any sensitivity analyses                                                                                                                                                             | Na             |
| <b>Results</b>            |         |                                                                                                                                                                                                   |                |
| Participants              | 13*     | (a) Report numbers of individuals at each stage of study—eg numbers potentially eligible, examined for eligibility, confirmed eligible, included in the study, completing follow-up, and analysed | 4              |
|                           |         | (b) Give reasons for non-participation at each stage                                                                                                                                              | 4              |
|                           |         | (c) Consider use of a flow diagram                                                                                                                                                                |                |
| Descriptive data          | 14*     | (a) Give characteristics of study participants (eg demographic, clinical, social) and information on exposures and potential confounders                                                          | 5              |
|                           |         | (b) Indicate number of participants with missing data for each variable of interest                                                                                                               | 5              |

|                          |     |                                                                                                                                                                                                              |             |
|--------------------------|-----|--------------------------------------------------------------------------------------------------------------------------------------------------------------------------------------------------------------|-------------|
| Outcome data             | 15* | Report numbers of outcome events or summary measures                                                                                                                                                         | 5           |
| Main results             | 16  | (a) Give unadjusted estimates and, if applicable, confounder-adjusted estimates and their precision (eg, 95% confidence interval). Make clear which confounders were adjusted for and why they were included | 6-9         |
|                          |     | (b) Report category boundaries when continuous variables were categorized                                                                                                                                    | 5-9         |
|                          |     | (c) If relevant, consider translating estimates of relative risk into absolute risk for a meaningful time period                                                                                             |             |
| Other analyses           | 17  | Report other analyses done—eg analyses of subgroups and interactions, and sensitivity analyses                                                                                                               | Na          |
| <b>Discussion</b>        |     |                                                                                                                                                                                                              |             |
| Key results              | 18  | Summarise key results with reference to study objectives                                                                                                                                                     | 9           |
| Limitations              | 19  | Discuss limitations of the study, taking into account sources of potential bias or imprecision. Discuss both direction and magnitude of any potential bias                                                   | 11          |
| Interpretation           | 20  | Give a cautious overall interpretation of results considering objectives, limitations, multiplicity of analyses, results from similar studies, and other relevant evidence                                   | 9-10, 11-12 |
| Generalisability         | 21  | Discuss the generalisability (external validity) of the study results                                                                                                                                        | 10          |
| <b>Other information</b> |     |                                                                                                                                                                                                              |             |
| Funding                  | 22  | Give the source of funding and the role of the funders for the present study and, if applicable, for the original study on which the present article is based                                                | 13          |

\*Give information separately for exposed and unexposed groups.

**Note:** An Explanation and Elaboration article discusses each checklist item and gives methodological background and published examples of transparent reporting. The STROBE checklist is best used in conjunction with this article (freely available on the Web sites of PLoS Medicine at <http://www.plosmedicine.org/>, Annals of Internal Medicine at <http://www.annals.org/>, and Epidemiology at <http://www.epidem.com/>). Information on the STROBE Initiative is available at [www.strobe-statement.org](http://www.strobe-statement.org).

# BMJ Open

## Divergent decennial trends in mental health according to age reveal poorer mental health for young people. Repeated cross-sectional population-based surveys from the HUNT Study, Norway

|                                 |                                                                                                                                                                                                                                                                                                                                                                                                                                                                                                                                                                                                                                                                                                                                                                                                                                                                                                                                                                                                                                                                                                                                                                                                                                                                                                                                                                                |
|---------------------------------|--------------------------------------------------------------------------------------------------------------------------------------------------------------------------------------------------------------------------------------------------------------------------------------------------------------------------------------------------------------------------------------------------------------------------------------------------------------------------------------------------------------------------------------------------------------------------------------------------------------------------------------------------------------------------------------------------------------------------------------------------------------------------------------------------------------------------------------------------------------------------------------------------------------------------------------------------------------------------------------------------------------------------------------------------------------------------------------------------------------------------------------------------------------------------------------------------------------------------------------------------------------------------------------------------------------------------------------------------------------------------------|
| Journal:                        | <i>BMJ Open</i>                                                                                                                                                                                                                                                                                                                                                                                                                                                                                                                                                                                                                                                                                                                                                                                                                                                                                                                                                                                                                                                                                                                                                                                                                                                                                                                                                                |
| Manuscript ID                   | bmjopen-2021-057654.R3                                                                                                                                                                                                                                                                                                                                                                                                                                                                                                                                                                                                                                                                                                                                                                                                                                                                                                                                                                                                                                                                                                                                                                                                                                                                                                                                                         |
| Article Type:                   | Original research                                                                                                                                                                                                                                                                                                                                                                                                                                                                                                                                                                                                                                                                                                                                                                                                                                                                                                                                                                                                                                                                                                                                                                                                                                                                                                                                                              |
| Date Submitted by the Author:   | 02-May-2022                                                                                                                                                                                                                                                                                                                                                                                                                                                                                                                                                                                                                                                                                                                                                                                                                                                                                                                                                                                                                                                                                                                                                                                                                                                                                                                                                                    |
| Complete List of Authors:       | Krokstad, Steinar; Norwegian University of Science and Technology, UNT Research Centre, Department of Public Health and Nursing; Nord-Trøndelag Hospital Trust, Levanger Hospital<br>Weiss, Daniel; Nord Universitetet, Faculty of Social Sciences<br>Krokstad, Morten; Nord Universitet - Levanger Campus, Faculty of Health Sciences and Nursing; Norwegian University of Science and Technology, Department of Mental Health<br>Rangul, Vegar; Norwegian University of Science and Technology, HUNT Research Centre, Department of Public Health and Nursing, Faculty of Medicine and Health Sciences; Nord Universitet - Levanger Campus, Faculty of Health Sciences and Nursing<br>Kvaløy, Kirsti; Norwegian University of Science and Technology, HUNT Research Centre; Nord-Trøndelag Hospital Trust, Levanger Hospital<br>Ingul, Jo; Nord-Trøndelag Hospital Trust, Levanger Hospital<br>Bjerkeset, Ottar; Nord Universitet - Levanger Campus, Faculty of Health Sciences and Nursing; Norwegian University of Science and Technology, Department of Mental Health<br>Twenge, Jean; San Diego State University, Department of Psychology, College of Sciences<br>Sund, Erik; Norwegian University of Science and Technology, HUNT Research Centre, Department of Public Health and Nursing; Nord Universitet - Levanger Campus, Faculty of Health Sciences and Nursing |
| <b>Primary Subject Heading</b>: | Public health                                                                                                                                                                                                                                                                                                                                                                                                                                                                                                                                                                                                                                                                                                                                                                                                                                                                                                                                                                                                                                                                                                                                                                                                                                                                                                                                                                  |
| Secondary Subject Heading:      | Mental health, Epidemiology, Health policy                                                                                                                                                                                                                                                                                                                                                                                                                                                                                                                                                                                                                                                                                                                                                                                                                                                                                                                                                                                                                                                                                                                                                                                                                                                                                                                                     |
| Keywords:                       | MENTAL HEALTH, PUBLIC HEALTH, EPIDEMIOLOGY, SOCIAL MEDICINE                                                                                                                                                                                                                                                                                                                                                                                                                                                                                                                                                                                                                                                                                                                                                                                                                                                                                                                                                                                                                                                                                                                                                                                                                                                                                                                    |
|                                 |                                                                                                                                                                                                                                                                                                                                                                                                                                                                                                                                                                                                                                                                                                                                                                                                                                                                                                                                                                                                                                                                                                                                                                                                                                                                                                                                                                                |

SCHOLARONE™  
Manuscripts





I, the Submitting Author has the right to grant and does grant on behalf of all authors of the Work (as defined in the below author licence), an exclusive licence and/or a non-exclusive licence for contributions from authors who are: i) UK Crown employees; ii) where BMJ has agreed a CC-BY licence shall apply, and/or iii) in accordance with the terms applicable for US Federal Government officers or employees acting as part of their official duties; on a worldwide, perpetual, irrevocable, royalty-free basis to BMJ Publishing Group Ltd ("BMJ") its licensees and where the relevant Journal is co-owned by BMJ to the co-owners of the Journal, to publish the Work in this journal and any other BMJ products and to exploit all rights, as set out in our [licence](#).

The Submitting Author accepts and understands that any supply made under these terms is made by BMJ to the Submitting Author unless you are acting as an employee on behalf of your employer or a postgraduate student of an affiliated institution which is paying any applicable article publishing charge ("APC") for Open Access articles. Where the Submitting Author wishes to make the Work available on an Open Access basis (and intends to pay the relevant APC), the terms of reuse of such Open Access shall be governed by a Creative Commons licence – details of these licences and which [Creative Commons](#) licence will apply to this Work are set out in our licence referred to above.

Other than as permitted in any relevant BMJ Author's Self Archiving Policies, I confirm this Work has not been accepted for publication elsewhere, is not being considered for publication elsewhere and does not duplicate material already published. I confirm all authors consent to publication of this Work and authorise the granting of this licence.

Manuscript revision\_3 BMJOpen Clean

1  
2  
3  
4  
5 1  
6  
7  
8 2 **Divergent decennial trends in mental health according to age**  
9 **reveal poorer mental health for young people. Repeated cross-**  
10 **sectional population-based surveys from the HUNT Study,**  
11 **Norway**  
12  
13  
14  
15  
16  
17  
18  
19  
20  
21  
22  
23  
24  
25  
26  
27  
28  
29  
30  
31  
32  
33  
34  
35  
36  
37  
38  
39  
40  
41  
42  
43  
44  
45  
46  
47  
48  
49  
50  
51  
52  
53  
54  
55  
56  
57  
58  
59  
60

8 Steinar Krokstad (000-0002-2932-6675), Daniel Albert Weiss, Morten Austheim Krokstad, Vegar Rangul, Kirsti Kvaløy, Jo Magne Ingul, Ottar Bjerkeset, Jean Marie Twenge, Erik Reidar Sund.

11 Steinar Krokstad, professor, HUNT Research Centre, Department of Public Health and Nursing, Norwegian University of Science and Technology, 7600 Levanger, Norway.

13 Daniel Albert Weiss, associate professor, Nord University, Faculty of Social Sciences, Universitetsalléen 11, 8026 Bodø, Norway.

15 Morten Austheim Krokstad, PhD Fellow, Faculty of Health Sciences and Nursing, Nord University, 7600 Levanger, Norway.

17 Vegar Rangul, associate professor, HUNT Research Centre, Department of Public Health and Nursing, Norwegian University of Science and Technology, 7600 Levanger, Norway.

19 Kirsti Kvaløy, professor, HUNT Research Centre, Department of Public Health and Nursing, Norwegian University of Science and Technology, 7600 Levanger, Norway.

21 Jo Magne Ingul, psychologist, Levanger Hospital, Nord-Trøndelag Hospital Trust, 7600 Levanger, Norway.

23 Ottar Bjerkeset, professor, Faculty of Health Sciences and Nursing, Nord University, 7600 Levanger, Norway.

25 Jean Marie Twenge, professor, Department of Psychology, College of Sciences, San Diego State University, San Diego, CA 92182-4611, USA.

27 Erik Reidar Sund, senior researcher, HUNT Research Centre, Department of Public Health and Nursing, Norwegian University of Science and Technology, 7600 Levanger, Norway.

30 Correspondence to: Steinar Krokstad (000-0002-2932-6675) [steinar.krokstad@ntnu.no](mailto:steinar.krokstad@ntnu.no)

Manuscript revision\_3 BMJOpen Clean

32

33

## 34 Abstract

35 **Objectives.** Public health trends are formed by political, economic, historical, and cultural factors in  
36 society. The aim of this paper was to describe overall changes in mental health among adolescents  
37 and adults in a Norwegian population over the three last decades and discuss some potential  
38 explanations for these changes.

39 **Design.** Repeated population-based health surveys to monitor decennial changes.

40 **Setting.** Data from three cross-sectional surveys in in 1995-97, 2006-08 and 2017-19 in the  
41 population-based HUNT Study in Norway were used.

42 **Participants.** The general population in a Norwegian County covering participants aged 13 to 79  
43 years, ranging from 48 000 to 62 000 in each survey.

44 **Main outcome measures.** Prevalence estimates of subjective anxiety and depression symptoms  
45 stratified by age and gender were assessed using the Hopkins Symptom Check-List 5 (HSCL-5) for  
46 adolescents and the Hospital Anxiety and Depression Scale (HADS) for adults.

47 **Results.** Adolescents' and young adults' mental distress increased sharply, especially between 2006-  
48 08 and 2017-19. However, depressive symptoms instead declined among adults ages 60 and over  
49 and anxiety symptoms remained largely unchanged in these groups.

50 **Conclusions.** Our trend data from the HUNT Study in Norway indicate poorer mental health among  
51 adolescents and young adults that we suggest are related to relevant changes in young people's  
52 living conditions and behavior, including the increased influence of screen-based media.

53

54

55

## 56 Strengths and limitations of this study

- 57 ➤ The HUNT Study is a large general county population health survey repeated every decade since  
58 the 1980s in Norway, suitable for following trends in public health
- 59 ➤ The total population 13+ years are invited to complete the survey
- 60 ➤ Identical screening tools for measuring anxiety and depression symptoms have been used in all  
61 three surveys covered by this article; Hopkins Symptoms Check List 5 for adolescents and  
62 Hospital Anxiety and Depression Scale for adults
- 63 ➤ Data covered approximately 78% of the total adolescent population and 54% to 70% of the total  
64 adult population with the risk of selection bias
- 65 ➤ Changes in socio-cultural and behavioral attitudes towards depression, anxiety, and mental  
66 health in general in recent years may have made it easier for participants to report mental  
67 health concerns in questionnaires that may have introduced some reporting bias.

68

Manuscript revision\_3 BMJOpen Clean

1  
2  
3  
4  
5  
6  
7  
8  
9  
10  
11  
12  
13  
14  
15  
16  
17  
18  
19  
20  
21  
22  
23  
24  
25  
26  
27  
28  
29  
30  
31  
32  
33  
34  
35  
36  
37  
38  
39  
40  
41  
42  
43  
44  
45  
46  
47  
48  
49  
50  
51  
52  
53  
54  
55  
56  
57  
58  
59  
60

69

For peer review only

## 70 Introduction

71 Mental health problems are among the leading causes of disease burden worldwide.<sup>1,2</sup> Further,  
72 mental health issues are primary drivers of disability worldwide, causing over 40 million years of  
73 disability in 20 to 29-year-olds.<sup>3</sup> Depression alone accounts for more disability-adjusted life years  
74 (DALYs) than all other mental disorders together<sup>4</sup> and is projected to become the leading cause of  
75 disability in high-income countries by 2030.<sup>5</sup> Thus, the public health burden of mood disorders is  
76 substantial, with negative effects including functional problems, reduced quality of life, disability,  
77 low work productivity, increased mortality, and increased health care utilization.

78 In Norway, estimates of years lived with disability in 2016 display anxiety and depression ranked as  
79 number four and seven on the list of the most contributing diseases in the Global Burden of Disease  
80 statistics.<sup>6</sup> Mental disorders are highly prevalent in disability benefit statistics, with awards often  
81 granted at younger ages than for other diagnoses. Mental disorders have additionally been shown to  
82 be responsible for the most working years lost (33.8%) of any disability.<sup>7</sup>

83 During the last decade, rates of depressive symptoms have increased in several adolescent  
84 populations.<sup>8-10</sup> In the USA, rates of depression, self-harm, and suicide attempts increased  
85 substantially in adolescents after 2010.<sup>11-13</sup> On the other hand, data have paradoxically shown an  
86 improvement in mental health with age indicating the opposite trend among older people.<sup>14,15</sup>

87 Several prominent research-based theories and models, which have provided significant support to  
88 modern understanding and practice of health promotion and disease prevention, may offer insights  
89 into understanding the causes of current trends in mental health. The World Health Organization's  
90 Commission on the Social Determinants of Health (SDH), for example, defined the SDH as "the  
91 conditions in which people are born, grow, live, work and age" as the fundamental drivers of public  
92 health.<sup>16</sup> Thus, when observing emerging trends in population health, it is important to look at the  
93 underlying conditions that may drive the changes. The eminent epidemiologist Geoffrey Rose  
94 stressed that the determinants of individual cases and the determinants of incidence rates are two  
95 different issues. The second seeks the causes of changing incidence of health problems in the  
96 population.<sup>17</sup> This theory argues that political, economic, historical, and cultural trends in Western  
97 societies may have affected mental health by influencing changes in social living conditions.  
98 Neoliberalism has been the dominating political ideology in Europe and US since the 1980s.  
99 Economic growth has been the main priority of the neoliberal agenda, together with the  
100 deregulation of economies, forcing open national and international markets to trade.<sup>18</sup> This has  
101 contributed to major changes in the living conditions of groups in societies around the world,  
102 including young people. For many, optimism and the belief in economic growth and improved  
103 quality of life have been replaced by concerns about climate change, growing social injustice, threats  
104 to democracy and the threat of technological developments leading to increased exploitation and  
105 potentially magnifying many of these other concerns.<sup>19</sup> These concerns have become particularly  
106 visible for young people growing up in many western, developed societies.

107 It has become increasingly apparent that the rapidly growing global unregulated information  
108 technology sector collects and mines enormous amounts of data on individuals.<sup>20</sup> The term *dataism*  
109 is used to describe the mindset or philosophy created by this trend. Recently, the term has been  
110 expanded to describe what others, including leading historian Yuval Noah Harari and leading social  
111 psychologist Shoshana Zuboff, has called an emerging form of capitalism, ideology, or even a new  
112 form of religion.<sup>20,21</sup> The increase in global interactions has caused a growth in international trade  
113 and the exchange of ideas and culture. Consumerism, the increasing polarization due to so-called  
114 technologically produced "echo-chambers" in digitally mediated spaces of social interaction are but

1  
2  
3 115 a few of the trends influencing these developments.<sup>22</sup> Taking selfies, and along with that, improving  
4 116 our image for public consumption have become regular in younger generations.<sup>23</sup>

6 117 Driven by these societal and technological trends, the use of the internet began to increase in the  
7 118 early 2000s, and smartphones after 2010. Social media also became more popular after 2010. These  
8 119 trends may have had a significant impact on human behavior, especially among adolescents and  
9 120 young adults. In several large studies, heavy users of such technologies are more likely to be  
10 121 depressed<sup>9 24</sup> or have lower levels of well-being.<sup>9 25</sup> Similarly, the HUNT Study of Norway have shown  
11 122 associations between the number of hours of screen time and increased anxiety and depression  
12 123 symptoms , which was particularly strong in girls when screen time predominantly involved the use  
13 124 of social media and internet. <sup>26</sup> Declines in face-to-face social interaction among adolescents may  
14 125 also impact even non-users of digital media, increasing the need for social assurance and reducing  
15 126 opportunities for in-person social interaction.<sup>27</sup> However, the need for social assurance fueled by  
16 127 excessive smartphone use is often not gratified, and eventually leads to greater loneliness.<sup>28</sup> Some  
17 128 evidence suggests that increased time spent using these technologies and, more generally, exposure  
18 129 to the evolving modern technological environment may be causes of the sudden increase in  
19 130 depression since 2010.<sup>11</sup> Stronger associations between digital media time and mental health  
20 131 indicators have been shown in girls compared to boys, perhaps because social media, used more  
21 132 frequently by girls, is more strongly linked to depression than gaming, used more frequently by  
22 133 boys.<sup>9</sup> Furthermore, research on adolescents in Norway has associated psychiatric problems with  
23 134 sleep quality problems, which are exacerbated by the use of social media and computer gaming  
24 135 among adolescents.<sup>29-31</sup> In addition, higher academic pressure following the dominant political  
25 136 preoccupation with competition and a credentials-based labor market influencing educational  
26 137 programs may also have increased mental distress among adolescents and students.<sup>32 33</sup> A  
27 138 Norwegian study has shown a clear decline in young peoples' reporting of happiness and life  
28 139 satisfaction over the last ten years. The study showed that increasing concern about the future  
29 140 contributed most to the decline. This concern was related to fears of various adverse events, such as  
30 141 future job opportunities and one's own financial situation. Other conditions such as dissatisfaction  
31 142 with social relationships, health, physical fitness and body also had significance.<sup>34</sup>

32 143 The aim of this paper was to describe the parallel changes in mental health among adolescents and  
33 144 adults in a Norwegian population over the three last decades and suggest some potential  
34 145 explanations for these changes based on theories related to the social determinants of health.<sup>16 17</sup>

35 146

## 36 147 **Methods**

37 148 The data were taken from three different waves in the Trøndelag Health Study (HUNT), Young-  
38 149 HUNT1 and HUNT2 (1995-97), Young-HUNT3 and HUNT3 (2006-08) and Young-HUNT4 and HUNT4  
39 150 (2017-19)(figure 1).<sup>35</sup> The invited participants were the total population in the Nord-Trøndelag  
40 151 County area aged 13-19 years (Young-HUNT) and 20+ years (HUNT).<sup>36</sup> The numbers and attendance  
41 152 rates are shown in figure 1. The samples ranged from 8980 to 8066 adolescent participants and from  
42 153 62 444 to 48 362 adult participants.

43 154

44 155 **Figure 1.** Data collected in the HUNT Study, Norway. Number of participants and response rates.<sup>35 36</sup>

45 156

Data from the different decades were stratified by age and sex. In the Young-HUNT surveys, we applied the Hopkins Symptom Checklist–5 (SCL-5). Hopkins Symptom Checklist–25 (SCL-25) is a widely applied self-report measure of anxiety and depression symptoms. Compared with the SCL-25, the short form model fit is good and correlations with established measures demonstrate convergent validity.<sup>37 38</sup> Prevalence (%) of anxiety and depression symptoms were measured with SCL-5 (cut-off  $\geq 2$ ). For adults, we applied the Hospital Anxiety and Depression Scale (HADS). The HADS is a brief 14-item self-report questionnaire, consisting of seven items for the anxiety subscale (HADS-A) and seven for the depression subscale (HADS-D), each scored on a Likert-scale from 0 (no symptoms) to 3 (symptoms maximally present). For this study, valid ratings of the HADS-D and HADS-A were defined as at least five completed items on both subscales. The score of those who filled in five or six items was based on the sum of completed items multiplied with 7/5 or 7/6, respectively. We used the conventional cut-off threshold of  $\geq 8$  for the HADS subscales. This cut off value is found to provide optimal sensitivity and specificity (about 0.80) and a good correlation with the case of clinical depression based on DSM-III and ICD–8/9 diagnostic criteria [34]. HADS is found to perform well in assessing the symptom severity and case categorization of anxiety and depressive disorders in the general population and in somatic, psychiatric and primary care patients.<sup>39</sup> Results are reported as prevalence (in %) along with 95 per cent confidence intervals (95% CI) and we also report p-values for linear trend according to time. Data management and analyses were done with Stata v. 16.<sup>40</sup>

### Patient and public involvement

Public stakeholders and patient organizations have been involved in the planning of all HUNT surveys. No patients were involved in the design or implementation of this specific study. As the study used previously collected data, we did not ask patients or the public to assess the burden of participation. Public stakeholders and patient organizations are involved in dissemination of results from the HUNT Study.

### Ethical approval

This study was approved by the Regional Committees for Medical and Health Research Ethics; REC south-east, Norway 196364/2020. All participants gave informed consent before taking part in the HUNT Study.

## Results

The percentage of adolescents screening positive for anxiety and depression nearly doubled between 1995-97 and 2017-19, from 15.3% to 29.8%, with most of the increase occurring between 2006-08 and 2017-19 (see Table 1).

**Table 1.** Characteristics for the sample aged 13-19 years. The Young-HUNT Study.<sup>36</sup>

|     |         | Young HUNT1<br>1995-97 |      | Young HUNT3<br>2006-08 |      | Young HUNT4<br>2017-19 |      |
|-----|---------|------------------------|------|------------------------|------|------------------------|------|
|     |         | N                      | %    | N                      | %    | N                      | %    |
| Age | 13-19 y | 8980                   | 100  | 8199                   | 100  | 8066                   | 100  |
| Sex |         |                        |      |                        |      |                        |      |
|     | Girls   | 4463                   | 49.7 | 4128                   | 50.4 | 4106                   | 50.9 |
|     | Boys    | 4517                   | 50.3 | 4071                   | 49.6 | 3960                   | 49.1 |

## Manuscript revision\_3 BMJOpen Clean

## SCL-5\*

|         |      |      |      |      |      |      |
|---------|------|------|------|------|------|------|
| Low     | 7412 | 82.5 | 6441 | 78.6 | 5410 | 67.1 |
| High    | 1372 | 15.3 | 1520 | 18.5 | 2404 | 29.8 |
| Missing | 196  | 2.2  | 238  | 2.9  | 252  | 3.1  |
| Total   | 8980 | 100  | 8199 | 100  | 8066 | 100  |

\*Hopkins Symptom Checklist-5 (SCL-5) cut-off  $\geq 2$ .

The percentage of adults screening positive for depression declined from 9.4% in 1995-97 to 6.7% in 2017-19, and the percentage screening positive for anxiety increased from 12.4% in 1995-97 to 13.4% in 2017-19 (see Table 2).

**Table 2.** Characteristics for the sample aged 20-79 years. The HUNT Study.<sup>35</sup>

|                  | HUNT2<br>(1995-97) |        | HUNT3<br>(2006-08) |        | HUNT4<br>(2017-19) |        |
|------------------|--------------------|--------|--------------------|--------|--------------------|--------|
|                  | N                  | (%)    | N                  | (%)    | N                  | (%)    |
| Age groups       |                    |        |                    |        |                    |        |
| 20-29 y          | 9111               | (14.6) | 4511               | (9.3)  | 6428               | (12.3) |
| 30-39 y          | 11630              | (18.6) | 6859               | (14.2) | 6755               | (12.9) |
| 40-49 y          | 13603              | (21.8) | 10012              | (20.7) | 9002               | (17.2) |
| 50-59 y          | 11058              | (17.7) | 11425              | (23.6) | 10761              | (20.5) |
| 60-69 y          | 9048               | (14.5) | 9801               | (20.3) | 11186              | (21.3) |
| 70-79 y          | 7994               | (12.8) | 5754               | (11.9) | 8310               | (15.9) |
| Sex              |                    |        |                    |        |                    |        |
| Females          | 32991              | (52.8) | 26316              | (54.4) | 28488              | (54.3) |
| Males            | 29453              | (47.2) | 22046              | (45.6) | 23954              | (45.7) |
| HADS Depression* |                    |        |                    |        |                    |        |
| Low              | 51049              | (81.8) | 34301              | (70.9) | 35271              | (67.3) |
| High             | 5855               | (9.4)  | 3453               | (7.1)  | 3505               | (6.7)  |
| Missing          | 5540               | (8.9)  | 10608              | (21.9) | 13666              | (26.1) |
| HADS Anxiety*    |                    |        |                    |        |                    |        |
| Low              | 44462              | (71.2) | 32192              | (66.6) | 31594              | (60.3) |
| High             | 7736               | (12.4) | 5387               | (11.1) | 7004               | (13.4) |
| Missing          | 10246              | (16.4) | 10783              | (22.3) | 13844              | (26.4) |
| Total            | 62444              | (100)  | 48362              | (100)  | 52442              | (100)  |

\* Hospital Anxiety and Depression Scale (HADS) cut-off  $\geq 8$ .

Table 3 shows the trends in prevalence (%) and 95 % confidence interval (95 % CI) for symptoms of poor mental health by age group and sex. Among adolescents, the prevalence of anxiety and depression symptoms above the recommended cut-off on the SCL-5 scale<sup>38</sup> was 10.2% for boys and 21.1% for girls in the 1990s. In the latest survey (2017-19), the prevalence had changed to 16.5% for boys and 44.4% for girls, i.e. particularly large change in the last ten years for girls (figure 2).



## Manuscript revision\_3 BMJOpen Clean

**Table 3.** Prevalence (%) and 95 per cent confidence interval (95% CI) for symptoms of anxiety and depression by age group and sex. The HUNT Study, Norway.

| Adolescents          |       | Young-HUNT1<br>1995-97 |               | Young-HUNT3<br>2006-08 |               | Young-HUNT4<br>2017-19 |               | P-value<br>for trend |
|----------------------|-------|------------------------|---------------|------------------------|---------------|------------------------|---------------|----------------------|
|                      |       | Prevalence             | 95% CI        | Prevalence             | 95% CI        | Prevalence             | 95% CI        |                      |
| SCL-5*               |       |                        |               |                        |               |                        |               |                      |
| Girls                | 13-19 | 21.1                   | (19.9- 22.3)  | 27.3                   | (26.0- 28.7)  | 44.4                   | (42.8- 45.9)  | 0.000                |
| Boys                 | 13-19 | 10.2                   | (9.3- 11.1)   | 10.6                   | (9.7- 11.6)   | 16.5                   | (15.4- 17.7)  | 0.000                |
| Adults               |       | HUNT2                  |               | HUNT3                  |               | HUNT4                  |               |                      |
| HADS<br>depression** |       |                        |               |                        |               |                        |               |                      |
| Females              | 20-29 | 4.2                    | (3.7 - 4.8)   | 4.6                    | (3.7 - 5.7)   | 10.7                   | (9.5 - 12.0)  | 0.000                |
|                      | 30-39 | 6.9                    | (6.3 - 7.6)   | 6.3                    | (5.5 - 7.2)   | 8.9                    | (7.9 - 10.1)  | 0.004                |
|                      | 40-49 | 9.3                    | (8.6 - 10.0)  | 7.7                    | (6.9 - 8.5)   | 9.0                    | (8.2 - 10.0)  | 0.377                |
|                      | 50-59 | 12.3                   | (11.5 - 13.3) | 9.0                    | (8.3 - 9.9)   | 8.4                    | (7.7 - 9.3)   | 0.000                |
|                      | 60-69 | 14.2                   | (13.2 - 15.3) | 8.8                    | (8.0 - 9.7)   | 7.4                    | (6.7 - 8.2)   | 0.000                |
|                      | 70-79 | 17.5                   | (16.3 - 18.9) | 12.6                   | (11.4 - 14.0) | 7.6                    | (6.8 - 8.5)   | 0.000                |
| Males                | 20-29 | 3.9                    | (3.3 - 4.5)   | 5.8                    | (4.5 - 7.4)   | 10.2                   | (8.7 - 11.9)  | 0.000                |
|                      | 30-39 | 6.9                    | (6.2 - 7.6)   | 7.3                    | (6.2 - 8.6)   | 11.6                   | (10.2 - 13.2) | 0.000                |
|                      | 40-49 | 10.4                   | (9.7 - 11.2)  | 9.0                    | (8.0 - 10.0)  | 10.2                   | (9.0 - 11.4)  | 0.358                |
|                      | 50-59 | 13.6                   | (12.7 - 14.6) | 10.5                   | (9.6 - 11.4)  | 9.4                    | (8.5 - 10.4)  | 0.000                |
|                      | 60-69 | 13.9                   | (12.8 - 15.0) | 11.1                   | (10.2 - 12.1) | 8.4                    | (7.6 - 9.3)   | 0.000                |
|                      | 70-79 | 16.8                   | (15.4 - 18.2) | 13.7                   | (12.4 - 15.2) | 10.5                   | (9.5 - 11.6)  | 0.000                |
| HADS anxiety**       |       |                        |               |                        |               |                        |               |                      |
| Females              | 20-29 | 15.5                   | (14.4 - 16.5) | 19.1                   | (17.4 - 21.0) | 32.0                   | (30.1 - 33.9) | 0.000                |
|                      | 30-39 | 17.1                   | (16.1 - 18.1) | 17.8                   | (16.5 - 19.2) | 26.7                   | (25.1 - 28.4) | 0.000                |
|                      | 40-49 | 17.9                   | (17.0 - 18.9) | 17.1                   | (16.0 - 18.2) | 22.1                   | (20.8 - 23.4) | 0.000                |
|                      | 50-59 | 18.6                   | (17.5 - 19.8) | 18.0                   | (17.0 - 19.1) | 20.4                   | (19.3 - 21.6) | 0.028                |
|                      | 60-69 | 18.0                   | (16.7 - 19.3) | 16.4                   | (15.4 - 17.6) | 17.9                   | (16.8 - 19.0) | 0.896                |
|                      | 70-79 | 17.2                   | (15.7 - 18.8) | 17.2                   | (15.8 - 18.8) | 16.2                   | (15.0 - 17.4) | 0.290                |
| Males                | 20-29 | 11.9                   | (10.9 - 13.0) | 12.0                   | (10.2 - 14.2) | 19.0                   | (17.0 - 21.2) | 0.000                |
|                      | 30-39 | 12.9                   | (12.0 - 13.9) | 11.4                   | (10.0 - 12.9) | 18.8                   | (17.0 - 20.7) | 0.000                |
|                      | 40-49 | 14.0                   | (13.2 - 15.0) | 12.5                   | (11.4 - 13.7) | 16.5                   | (15.1 - 18.0) | 0.030                |
|                      | 50-59 | 12.5                   | (11.6 - 13.5) | 11.7                   | (10.8 - 12.7) | 15.2                   | (14.0 - 16.4) | 0.001                |
|                      | 60-69 | 9.2                    | (8.3 - 10.2)  | 8.5                    | (7.6 - 9.4)   | 11.0                   | (10.1 - 12.0) | 0.004                |
|                      | 70-79 | 9.4                    | (8.2 - 10.6)  | 6.5                    | (5.6 - 7.6)   | 8.4                    | (7.5 - 9.4)   | 0.325                |

\*Hopkins Symptom Checklist-5 (SCL-5) cut-off  $\geq 2$ .

\*\* Hospital Anxiety and Depression Scale (HADS) cut-off  $\geq 8$ .

**Figure 2.** Prevalence (%) of anxiety and depression symptoms measured with SCL-5 (cut-off  $\geq 2$ ), from three decades of adolescents in the Young-HUNT Study.

For adults, table 3 shows that an increasing prevalence for depressive symptoms above cut-off with age was observed in both sexes, from around four percent among young adults 20-29 years and around 17% among older people 70-79 years in 1995-97 (figure 3). In contrast to this, the highest

Manuscript revision\_3 BMJOpen Clean

219 prevalence among young women (10.7%), and the lowest among the elderly aged 70-79 (7.6%) were  
220 observed in the last survey (2017-19) (figure 3).

221

222 **Figure 3.** Prevalence (%) of depression symptoms measured with HADS-D (cut-off  $\geq 8$ ) from three  
223 decades, the HUNT Study.

224

225 The prevalence of anxiety symptoms above cut-off measured with HADS-A was similar in all age  
226 groups in 1995-97 (table 3); around 10% for men and 17% for women. In the last survey, we  
227 observed a markedly higher prevalence of anxiety symptoms for both genders for participants aged  
228 20-39 years (figure 4).

229

230 **Figure 4.** Prevalence (%) of anxiety symptoms measured with HADS-A (cut-off  $\geq 8$ ) from three  
231 decades, the HUNT Study.

232

233 The negative trends among young adults and the positive trends among older participants shown in  
234 figures 3 and 4 were statistically significant in almost all groups (appendix table 1).

235

## 236 Discussion

237 Results from the large Norwegian population-based HUNT Study of more than 170,000 people  
238 showed large increases in the prevalence of anxiety and depression symptoms among adolescents  
239 and young adults since the 1990s, especially between 2006-08 and 2017-19. These increases were  
240 largest among young women, though there were also increases among young men. In contrast,  
241 among older adults rates of depressive symptoms declined, and anxiety symptoms remained largely  
242 unchanged.

243

### 244 *Possible reasons for change*

245 An important question is whether the increases in anxiety and depression symptoms reported were  
246 influenced by changes in socio-cultural and behavioral attitudes towards anxiety, depression, and  
247 mental health in general. In recent years, mental health among young people has received increased  
248 attention in the Norwegian society. As a result, it may have become easier for young participants to  
249 report anxiety and depression symptoms and express emotion in questionnaires. For the adult  
250 participants, we have used a different tool than for adolescents (HADS), however, the exact same  
251 trend for participants aged 20-39 years as in adolescents was identified. The opposite trend was  
252 observed for the elderly. The fact that two different instruments present similar trends among  
253 young people in our sample, and the divergent trends by age, supports the validity of our findings. In  
254 addition, results are supported by data from the Norwegian health services and prescription  
255 databases, clearly demonstrating increasing numbers of individuals either referred for, or in need of  
256 treatment for mental illness among young people.<sup>41</sup> The increase in reported anxiety and depression  
257 symptoms demonstrated in our data, is also accompanied by an increasing number of adolescents in  
258 the general population referred to mental health services,<sup>42</sup> an increased use of psychotropic drugs

## Manuscript revision\_3 BMJOpen Clean

1  
2  
3 259 in age groups reporting increasing symptoms,<sup>43</sup> and an increasing number of young adults in need of  
4 260 social welfare.<sup>44</sup> In addition, similar increases in mental health issues in countries such as the U.S.  
5 261 have been accompanied by concurrent increases in hospital admissions for self-harm behaviors and  
6 262 suicide attempts that cannot be attributed to changes in survey self-reports.<sup>45 46</sup> Consistent with the  
7 263 changes we see in our Norwegian data, a clear decline in young people's happiness and life  
8 264 satisfaction over the last ten years has been reported as well.<sup>34</sup>

11 265 Thus, taken together, evidence seems to suggest that the observed trends in poorer mental health  
12 266 among young people are real. To determine the causes behind such public health trends is, however,  
13 267 challenging. Younger generations clearly face concerns that have increased in significance and  
14 268 importance throughout the previous few decades. These include worsening climate change, growing  
15 269 social injustice,<sup>47</sup> emerging threats to democratic institutions and the propagation of consequences  
16 270 related to the advent of innovative modern technological developments.<sup>19</sup> In addition, higher  
17 271 academic pressure reflects the dominant neoliberal political preoccupation with competition.<sup>33</sup>  
18 272 When young people's sense of self-worth is dependent on what they achieve in school, it can also  
19 273 lead to anxiety and depression if they do not achieve expected results.<sup>32</sup>

22 274 Another substantial change in Western societies during the last decade, and which we believe may  
23 275 have great significance, has been in technology use. The tech industry's strong influence on young  
24 276 people's behavior using deliberately manipulative and exploitive strategies may be an important  
25 277 driver of the observed trends among young people in our data.<sup>11</sup> Growing use of social media as a  
26 278 daily activity has led to the emergence of ethical concerns related to the management of data.<sup>48</sup>  
27 279 Several studies have demonstrated the mechanisms of addiction to electronic devices used to access  
28 280 these digital ecosystems.<sup>20 49</sup> Addiction to social networks is a consequence of users' fear of missing  
29 281 out, feeling that they have an impact on others, and make them feel an instant reward when they  
30 282 publish content about themselves.<sup>48</sup> Evidence has shown that heavy users of social media, for  
31 283 example, are twice as likely as light users to be depressed or report lower levels of well-being.<sup>11</sup>  
32 284 These effects may be associated with an increase in the prevalence of loneliness seen after 2012<sup>28 50</sup>  
33 285 and reduced hours of sleep among adolescents.<sup>29 30</sup> Some have questioned the suggestion that  
34 286 increased time spent on social media is a leading cause of adverse mental health among young  
35 287 people, with individual data revealing only a weak association between time use and mental health  
36 288 in a longitudinal study.<sup>51</sup> However, associations at the individual level may be different from the  
37 289 group-level associations we examine here; even non-users of technology may be impacted by the  
38 290 changes in social interaction caused by technology use.<sup>11</sup> The increased acceptance, integration and  
39 291 near-obligatory use of internet-based media technologies to access services and social networks in  
40 292 society increasingly either isolate non-users or force them to conform. Furthermore, as social norms  
41 293 move away from in-person social interaction, even individuals interested in in-person interactions  
42 294 find it increasingly difficult to find others to do so with. Social media is social, not just individual, and  
43 295 naturally possesses powerful network effects.<sup>27</sup> Thus, it becomes necessary to look further into the  
44 296 political, historical and cultural context in which these behavioral changes unfold.<sup>17 52</sup>

51 297 Among older segments of the population, we see no similar increase in mental health issues over the  
52 298 study period. In fact, our results highlight rather the opposite – improved mental health. Such trends  
53 299 have also been observed in other populations.<sup>14</sup> National survey data in Norway shows that social  
54 300 media use follows a consistent age gradient, with younger populations showing considerably more  
55 301 use of social media daily compared to older.<sup>53</sup> Older people in Norway benefit from good living  
56 302 conditions with financial security in a generous welfare state<sup>54</sup> and good prospects of high life  
57 303 expectancy.<sup>55</sup> Older individuals may also benefit from emotional regulation and complex social

Manuscript revision\_3 BMJOpen Clean

304 decision-making, and thus be able to cope with the stress of technological developments in other  
305 ways than young people.<sup>14 56</sup>

306

### 307 *Strengths*

308 The HUNT Study collects data from a total population at approximately ten years intervals, enabling  
309 studies of health changes in the population over time.<sup>35 36</sup> The invitation/sampling of participants,  
310 and methods for measuring mental health, have been conducted using the same methods and  
311 instruments in all three surveys included in the present study. Large sample sizes have ensured  
312 reliable estimates. Health trends in the county follow both national<sup>57</sup> and international western  
313 health trends closely.<sup>58</sup> The population is stable and relatively homogenous with a low net migration.  
314 As part of a national Nordic welfare state, the population recruited is part of a country with a  
315 universal public health service and a school system where almost everyone attends the same local  
316 schools.

317

### 318 *Limitations*

319 Our survey data covered approximately 78% of the total adolescent population and 70% to 54% of  
320 the total adult population (as the result of a decrease in participation from HUNT2 to HUNT3 among  
321 adults). Non-response analyzes for adult participants have shown that those who choose not to  
322 participate generally have a higher mortality rate, slightly higher prevalence of chronic illness, and  
323 lower socioeconomic position than participants.<sup>59</sup> This may have biased our findings so that  
324 unfavorable trends among adolescents are underestimated and favorable trends among adults are  
325 overestimated. The study design does not allow for causal inferences.

326

### 327 *Relevance*

328 The tech industry's strong influence on young people's behavior has taken place without notable  
329 political concern in Norway or other western countries, in line with dominating neoliberal political  
330 ideology.<sup>18 60</sup> This has allowed the rapid expansion of innovative technologies by commercial and  
331 corporate actors to facilitate the exploitation of spheres of society relatively untouched by capitalist  
332 interests before the emergence of these technologies. The consequences are, however, not going  
333 completely unrecognized, and awareness is growing, in part represented by an emerging discussion  
334 and appreciation for addressing the power and influence of commercial<sup>61</sup> and corporate  
335 determinants of health.<sup>62</sup>

336 Our results are in line with results suggesting poorer mental health observed among adolescents and  
337 young adults internationally<sup>8 9</sup> and, more specifically, in the USA.<sup>11</sup> Supporting research shows,  
338 additionally, that social media use has significant effects on mental health, particularly in young  
339 people.<sup>25</sup> The data on both are of great interest to public health policy. The undesirable trend has  
340 affected many young people and affected everyday life substantially for large groups in Norway.  
341 Based on earlier findings from the HUNT Study, there is reason to forecast that poorer mental health  
342 may contribute to an increasing incidence of work-related incapacity in Norway now and in the years  
343 to come.<sup>6 63</sup>

344

Manuscript revision\_3 BMJOpen Clean

### 345 *Need for further research and need for action*

346 Our findings highlight the need for further research to find out if some of the reductions in mental  
347 health simply may be due to greater awareness of mental health or changes in reporting. It is,  
348 furthermore, necessary to investigate the broad range of potential driving factors underlying  
349 increased mental health problems in young people. The long-term consequences will be important  
350 to follow, to see if the correlation between poorer mental health in adolescents and negative  
351 outcomes in adulthood will be as expected based on previous studies.<sup>63</sup> Based on what is outlined in  
352 this paper, there is every reason to consider policy measures to protect youth and young adults  
353 against increasing mental distress. A public health policy is needed that strengthens faith in the  
354 future, demonstrating our influence on living conditions and reduced pressure and stress on young  
355 people. Experience and evidence from population-based public health and relevant research,  
356 provides reason to believe that increased regulation of the tech industry, which has enjoyed  
357 relatively few restrictions for decades, will be important moving forward. Governments and  
358 individuals could challenge their role in defining the dominant narrative, setting the rules by which  
359 trade operates, commodifying knowledge and undermining political, social, and economic rights in  
360 our society.<sup>62</sup> Relevant measures could be, but are not limited to, an enforced age minimum for use  
361 of social media and online computer gaming, creating increased accountability for the content  
362 published by technology companies and their platforms, regulations to restrict addictive elements of  
363 different software, and taxation of the industry to obtain funding for relevant public health  
364 initiatives. However, of greatest concern is restructuring and regulating the entire economic  
365 business model on which many of these tech giants not only depend on for their enormously  
366 powerful profits but have also had a central role in developing for the deliberate manipulation and  
367 exploitation of its most vulnerable users. Such measures would undoubtedly increase effectiveness  
368 through systematic international cooperation. In addition, the effects of climate change and global  
369 economic policy and academic pressure as a result of dominant political ideology, also should be  
370 further investigated.<sup>52</sup>

### 372 *Conclusion*

373 The data from the HUNT Study in Norway indicate a strong increase in anxiety and depression  
374 symptoms among adolescents and young adults, and the opposite trend among the elderly. This  
375 trend is likely related to significant disruptions in the living conditions of young people in society and  
376 behavioral changes in adolescents and young adults, which we suggest are likely driven by major  
377 socio-political trends, such as the growth of neoliberal policy, globalization and an expanding tech  
378 industry.<sup>21</sup> The results of this study show that is urgently important that health authorities now see  
379 the need to implement significant political measures to address the underlying trends in mental  
380 health, and their causes, seen in young people.

### 382 **Acknowledgments**

383 The Trøndelag Health Study (HUNT) is a collaboration between HUNT Research Centre (Faculty of  
384 Medicine and Health Sciences, NTNU, Norwegian University of Science and Technology), Nord-  
385 Trøndelag County Council, Central Norway Regional Health Authority, and the Norwegian Institute of  
386 Public Health.

387

## 388 Contributor statement

389 SK was the main author and contributed to the conception and design of the work, acquisition of  
390 data, interpretation of data, drafting and revising it critically for important intellectual content. DAW  
391 contributed to interpretation of data, drafting and revising the work critically for important  
392 intellectual content. MAK contributed to the conception and design, revising the work critically for  
393 important intellectual content, interpretation of data, and revising it critically for important  
394 intellectual content. VR contributed to the acquisition of data, analyses and interpretation of data,  
395 and revising the work critically for important intellectual content. KK contributed to acquisition of  
396 data, interpretation of data, drafting and revising the work critically for important intellectual  
397 content. JMI contributed to acquisition of data, interpretation of data, and revising the work  
398 critically for important intellectual content. OB contributed to acquisition of data, interpretation of  
399 data, and revising the work critically for important intellectual content. JMT contributed to  
400 interpretation of data, drafting and revising the work critically for important intellectual content. ERS  
401 contributed to the conception and design of the work, acquisition of data, analyses and  
402 interpretation of data, drafting and revising it critically for important intellectual content. All authors  
403 approved the final version to be published and are accountable for all aspects of the work. SK  
404 accepts full responsibility for the work and/or the conduct of the study, had access to the data, and  
405 controlled the decision to publish. The corresponding author attests that all listed authors meet  
406 authorship criteria and that no others meeting criteria have been omitted.

407 The Corresponding Author has the right to grant on behalf of all authors and does grant on behalf of  
408 all authors, an exclusive license (or nonexclusive for government employees) on a worldwide basis to  
409 the BMJ Publishing Group Ltd to permit this article (if accepted) to be published in BMJ editions and  
410 any other BMJ PGL products and sublicences such use and exploit all subsidiary rights, as set out in  
411 our license.

## 412 Competing interests

413 All authors have completed the Unified Competing Interest form (available on request from the  
414 corresponding author) and declare: no support from any organisation for the submitted work; no  
415 financial relationships with any organisations that might have an interest in the submitted work in  
416 the previous three years, no other relationships or activities that could appear to have influenced  
417 the submitted work.

## 418 Funding

419 The HUNT Study is publicly funded, and this paper have no external funding. The funding sources  
420 were not involved in the study design; analysis, and interpretation; writing of the report; or the  
421 decision to submit the article for publication. The researchers were independent from funders and  
422 all authors had full access to all of the data (including statistical reports and tables) in the study and  
423 take responsibility for the integrity of the data and the accuracy of the data analysis.

## 424 Data sharing statement

425 Data sharing: The data used is individual-based sensitive health data that can not be made available  
426 without violating the consent and Norwegian law. Data from the Trøndelag Health Study (HUNT) is  
427 available upon reasonable request to the HUNT data access committee (hunt@medisin.ntnu.no).

Manuscript revision\_3 BMJOpen Clean

1  
2  
3 428 The HUNT data access information ([www.ntnu.edu/hunt/data](http://www.ntnu.edu/hunt/data)) describes in detail the policy about  
4 429 data availability.

6 430 Transparency: The lead author (SK) affirms that the manuscript is an honest, accurate, and  
7 431 transparent account of the study being reported; that no important aspects of the study have been  
8 432 omitted; and any discrepancies from the study as planned have been explained.

10 433

## 13 434 References

14 435

- 16 436 1. Global, regional, and national incidence, prevalence, and years lived with disability for 301 acute  
17 437 and chronic diseases and injuries in 188 countries, 1990-2013: a systematic analysis for the  
18 438 Global Burden of Disease Study 2013. *Lancet* 2015;386(9995):743-800. doi: 10.1016/s0140-  
19 439 6736(15)60692-4 [published Online First: 2015/06/13]
- 21 440 2. Patel V, Flisher AJ, Hetrick S, et al. Mental health of young people: a global public-health  
22 441 challenge. *Lancet* 2007;369(9569):1302-13. doi: 10.1016/s0140-6736(07)60368-7 [published  
23 442 Online First: 2007/04/17]
- 24 443 3. Lozano R, Naghavi M, Foreman K, et al. Global and regional mortality from 235 causes of death for  
25 444 20 age groups in 1990 and 2010: a systematic analysis for the Global Burden of Disease  
26 445 Study 2010. *Lancet* 2012;380(9859):2095-128. doi: 10.1016/s0140-6736(12)61728-0  
27 446 [published Online First: 2012/12/19]
- 29 447 4. Murray CJ, Vos T, Lozano R, et al. Disability-adjusted life years (DALYs) for 291 diseases and  
30 448 injuries in 21 regions, 1990-2010: a systematic analysis for the Global Burden of Disease  
31 449 Study 2010. *Lancet* 2012;380(9859):2197-223. doi: 10.1016/s0140-6736(12)61689-4  
32 450 [published Online First: 2012/12/19]
- 33 451 5. Mathers CD, Loncar D. Projections of Global Mortality and Burden of Disease from 2002 to 2030.  
34 452 *PLOS Medicine* 2006;3(11):e442. doi: 10.1371/journal.pmed.0030442
- 35 453 6. Tollånes MC, Knudsen AK, Vollset SE, et al. Disease burden in Norway in 2016. *Tidsskr Nor*  
36 454 *Laegeforen* 2018;138(15) doi: 10.4045/tidsskr.18.0274 [published Online First: 2018/10/03]
- 37 455 7. Knudsen AK, Øverland S, Hotopf M, et al. Lost working years due to mental disorders: an analysis  
38 456 of the Norwegian disability pension registry. *PLoS One* 2012;7(8):e42567. doi:  
39 457 10.1371/journal.pone.0042567 [published Online First: 2012/08/21]
- 41 458 8. Bor W, Dean AJ, Najman J, et al. Are child and adolescent mental health problems increasing in  
42 459 the 21st century? A systematic review. *Aust N Z J Psychiatry* 2014;48(7):606-16. doi:  
43 460 10.1177/0004867414533834 [published Online First: 2014/05/16]
- 44 461 9. Twenge JM, Farley E. Not all screen time is created equal: associations with mental health vary by  
45 462 activity and gender. *Soc Psychiatry Psychiatr Epidemiol* 2021;56(2):207-17. doi:  
46 463 10.1007/s00127-020-01906-9 [published Online First: 2020/08/04]
- 48 464 10. Myhr A, Anthun KS, Lillefjell M, et al. Trends in Socioeconomic Inequalities in Norwegian  
49 465 Adolescents' Mental Health From 2014 to 2018: A Repeated Cross-Sectional Study. *Front*  
50 466 *Psychol* 2020;11:1472. doi: 10.3389/fpsyg.2020.01472 [published Online First: 2020/08/01]
- 51 467 11. Twenge JM. Why increases in adolescent depression may be linked to the technological  
52 468 environment. *Curr Opin Psychol* 2020;32:89-94. doi: 10.1016/j.copsyc.2019.06.036  
53 469 [published Online First: 2019/08/16]
- 54 470 12. Twenge JM, Cooper AB, Joiner TE, et al. Age, period, and cohort trends in mood disorder  
55 471 indicators and suicide-related outcomes in a nationally representative dataset, 2005-2017. *J*  
56 472 *Abnorm Psychol* 2019;128(3):185-99. doi: 10.1037/abn0000410 [published Online First:  
57 473 2019/03/15]

Manuscript revision\_3 BMJOpen Clean

- 1  
2  
3 474 13. Keyes KM, Gary D, O'Malley PM, et al. Recent increases in depressive symptoms among US  
4 475 adolescents: trends from 1991 to 2018. *Soc Psychiatry Psychiatr Epidemiol* 2019;54(8):987-  
5 476 96. doi: 10.1007/s00127-019-01697-8 [published Online First: 2019/04/01]  
6 477  
7 478 14. Thomas ML, Kaufmann CN, Palmer BW, et al. Paradoxical Trend for Improvement in Mental  
8 478 Health With Aging: A Community-Based Study of 1,546 Adults Aged 21-100 Years. *J Clin*  
9 479 *Psychiatry* 2016;77(8):e1019-25. doi: 10.4088/JCP.16m10671 [published Online First:  
10 480 2016/08/26]  
11 481 15. Zivin K, Pirraglia PA, McCammon RJ, et al. Trends in depressive symptom burden among older  
12 482 adults in the United States from 1998 to 2008. *J Gen Intern Med* 2013;28(12):1611-9. doi:  
13 483 10.1007/s11606-013-2533-y [published Online First: 2013/07/10]  
14 484 16. Braveman P, Gottlieb L. The social determinants of health: it's time to consider the causes of the  
15 485 causes. *Public Health Rep* 2014;129 Suppl 2(Suppl 2):19-31. doi:  
16 486 10.1177/00333549141291s206 [published Online First: 2014/01/05]  
17 487 17. Rose G. Sick individuals and sick populations. *Int J Epidemiol* 2001;30(3):427-32; discussion 33-4.  
18 488 doi: 10.1093/ije/30.3.427 [published Online First: 2001/06/21]  
19 489 18. Ostry JD, Loungani P, Furceri D. Neoliberalism: oversold. *Finance & development* 2016;53(2):38-  
20 490 41.  
21 491 19. Harari YN. 21 lessons for the 21st century. London: Vintage Books 2019.  
22 492 20. Zuboff S. The age of surveillance capitalism : the fight for the future at the new frontier of power.  
23 493 London, New York: Profile Books PublicAffairs 2019.  
24 494 21. Harari YN. Homo Deus: A brief history of tomorrow: Random House 2016.  
25 495 22. Harris T. How technology hijacks people's minds—from a magician and Google's design ethicist.  
26 496 *Medium Magazine* 2016  
27 497 23. Creativity C. Top 9 trends of global culture during the last 15 years *Culture & Creativity*; 2021  
28 498 [Available from: [https://www.culturepartnership.eu/en/article/top-9-trends-of-the-last-](https://www.culturepartnership.eu/en/article/top-9-trends-of-the-last-decade)  
29 499 [decade](https://www.culturepartnership.eu/en/article/top-9-trends-of-the-last-decade) accessed 08.02. 2021.  
30 500 24. Lin LY, Sidani JE, Shensa A, et al. ASSOCIATION BETWEEN SOCIAL MEDIA USE AND DEPRESSION  
31 501 AMONG U.S. YOUNG ADULTS. *Depress Anxiety* 2016;33(4):323-31. doi: 10.1002/da.22466  
32 502 [published Online First: 2016/01/20]  
33 503 25. Keles B, McCrae N, Grealish A. A systematic review: the influence of social media on depression,  
34 504 anxiety and psychological distress in adolescents. *International Journal of Adolescence and*  
35 505 *Youth* 2020;25(1):79-93. doi: 10.1080/02673843.2019.1590851  
36 506 26. Korpås JA. Screen time associated to mental health in adolescents: Knowledge from a population  
37 507 based study. Norwegian University of Science and Technology, 2020.  
38 508 27. Dwyer RJ, Kushlev K, Dunn EW. Smartphone use undermines enjoyment of face-to-face social  
39 509 interactions. *Journal of experimental social psychology* 2018;78:233-39. doi:  
40 510 10.1016/j.jesp.2017.10.007  
41 511 28. Kim J-H. Longitudinal Associations Among Psychological Issues and Problematic Use of  
42 512 Smartphones: A Two-Wave Cross-Lagged Study. *Journal of media psychology*  
43 513 2019;31(3):117-27. doi: 10.1027/1864-1105/a000234  
44 514 29. Keyes KM, Maslowsky J, Hamilton A, et al. The great sleep recession: changes in sleep duration  
45 515 among US adolescents, 1991-2012. *Pediatrics* 2015;135(3):460-8. doi: 10.1542/peds.2014-  
46 516 2707 [published Online First: 2015/02/18]  
47 517 30. Twenge JM, Krizan Z, Hisler G. Decreases in self-reported sleep duration among U.S. adolescents  
48 518 2009-2015 and association with new media screen time. *Sleep Med* 2017;39:47-53. doi:  
49 519 10.1016/j.sleep.2017.08.013 [published Online First: 2017/11/22]  
50 520 31. Hestetun I, Svendsen MV, Oellingrath IM. Sleep problems and mental health among young  
51 521 Norwegian adolescents. *Nord J Psychiatry* 2018;72(8):578-85. doi:  
52 522 10.1080/08039488.2018.1499043 [published Online First: 2018/10/10]  
53  
54  
55  
56  
57  
58  
59  
60



Manuscript revision\_3 BMJOpen Clean

- 1  
2  
3 523 32. Pascoe MC, Hetrick SE, Parker AG. The impact of stress on students in secondary school and  
4 524 higher education. *International Journal of Adolescence and Youth* 2020;25(1):104-12. doi:  
5 525 10.1080/02673843.2019.1596823  
6 526 33. Cosma A, Stevens G, Martin G, et al. Cross-National Time Trends in Adolescent Mental Well-  
7 527 Being From 2002 to 2018 and the Explanatory Role of Schoolwork Pressure. *J Adolesc Health*  
8 528 2020;66(6s):S50-s58. doi: 10.1016/j.jadohealth.2020.02.010 [published Online First:  
9 529 2020/05/25]  
10 530 34. Hellevik O, Hellevik T. Hvorfor ser færre unge lyst på livet? Utviklingen for opplevd livskvalitet  
11 531 blant ungdom og yngre voksne i Norge. [Why are fewer young people looking forward to  
12 532 life? The development for perceived quality of life among young people and younger adults  
13 533 in Norway ]. *Nordisk Tidsskrift for Ungdomsforskning* 2021;2:104-28. doi:  
14 534 10.18261/issn.2535-8162-2021-02-02  
15 535 35. Krokstad S, Langhammer A, Hveem K, et al. Cohort Profile: the HUNT Study, Norway. *Int J*  
16 536 *Epidemiol* 2013;42(4):968-77. doi: 10.1093/ije/dys095 [published Online First: 2012/08/11]  
17 537 36. Holmen TL, Bratberg G, Krokstad S, et al. Cohort profile of the Young-HUNT Study, Norway: a  
18 538 population-based study of adolescents. *Int J Epidemiol* 2014;43(2):536-44. doi:  
19 539 10.1093/ije/dys232 [published Online First: 2013/02/06]  
20 540 37. Schmalbach B, Zenger M, Tibubos AN, et al. Psychometric Properties of Two Brief Versions of the  
21 541 Hopkins Symptom Checklist: HSCL-5 and HSCL-10. *Assessment* 2019:1073191119860910.  
22 542 doi: 10.1177/1073191119860910 [published Online First: 2019/07/06]  
23 543 38. Strand BH, Dalgard OS, Tambs K, et al. Measuring the mental health status of the Norwegian  
24 544 population: a comparison of the instruments SCL-25, SCL-10, SCL-5 and MHI-5 (SF-36). *Nord J*  
25 545 *Psychiatry* 2003;57(2):113-8. doi: 10.1080/08039480310000932 [published Online First:  
26 546 2003/05/15]  
27 547 39. Bjelland I, Dahl AA, Haug TT, et al. The validity of the Hospital Anxiety and Depression Scale. An  
28 548 updated literature review. *J Psychosom Res* 2002;52(2):69-77. doi: 10.1016/s0022-  
29 549 3999(01)00296-3 [published Online First: 2002/02/08]  
30 550 40. Stata Statistical Software: Release 16. [program]. College Station, TX: StataCorp LLC, 2019.  
31 551 41. Hartz I, Skurtveit S, Steffenak AKM, et al. Psychotropic drug use among 0–17 year olds during  
32 552 2004–2014: a nationwide prescription database study. *BMC Psychiatry* 2016;16(1):12. doi:  
33 553 10.1186/s12888-016-0716-x  
34 554 42. Wæhre A, Schorkopf M. Gender variance, medical treatment and our responsibility. *Tidsskr Nor*  
35 555 *Laegeforen* 2019;139(7) doi: 10.4045/tidsskr.19.0178 [published Online First: 2019/04/11]  
36 556 43. Furu K, Hjellevik V, Hartz I, et al. Legemiddelbruk hos barn og unge i Norge 2008-2017. [Drug use  
37 557 in children and young people in Norway 2008-2017]. Oslo: Folkehelseinstituttet, 2018.  
38 558 44. Kaltenbrunner Bernitz B, Grees N, Jakobsson Randers M, et al. Young adults on disability benefits  
39 559 in 7 countries. *Scand J Public Health* 2013;41(12 Suppl):3-26. doi:  
40 560 10.1177/1403494813496931 [published Online First: 2013/10/18]  
41 561 45. Mercado MC, Holland K, Leemis RW, et al. Trends in Emergency Department Visits for Nonfatal  
42 562 Self-inflicted Injuries Among Youth Aged 10 to 24 Years in the United States, 2001-2015.  
43 563 *Jama* 2017;318(19):1931-33. doi: 10.1001/jama.2017.13317 [published Online First:  
44 564 2017/11/23]  
45 565 46. Plemmons G, Hall M, Doupnik S, et al. Hospitalization for Suicide Ideation or Attempt: 2008-  
46 566 2015. *Pediatrics* 2018;141(6) doi: 10.1542/peds.2017-2426 [published Online First:  
47 567 2018/05/18]  
48 568 47. Strand BH, Steingrimsdóttir Ó A, Grøholt EK, et al. Trends in educational inequalities in cause  
49 569 specific mortality in Norway from 1960 to 2010: a turning point for educational inequalities  
50 570 in cause specific mortality of Norwegian men after the millennium? *BMC Public Health*  
51 571 2014;14:1208. doi: 10.1186/1471-2458-14-1208 [published Online First: 2014/11/25]  
52  
53  
54  
55  
56  
57  
58  
59  
60

Manuscript revision\_3 BMJOpen Clean

- 1  
2  
3 572 48. Saura JR, Palacios-Marqués D, Iturricha-Fernández A. Ethical design in social media: Assessing the  
4 573 main performance measurements of user online behavior modification. *Journal of Business*  
5 574 *Research* 2021;129:271-81. doi: <https://doi.org/10.1016/j.jbusres.2021.03.001>  
6 575 49. Burr C, Taddeo M, Floridi L. The ethics of digital well-being: A thematic review. *Science and*  
7 576 *engineering ethics* 2020;26(4):2313-43.  
8 577 50. Twenge JM, Campbell WK. Media Use Is Linked to Lower Psychological Well-Being: Evidence  
9 578 from Three Datasets. *Psychiatr Q* 2019;90(2):311-31. doi: 10.1007/s11126-019-09630-7  
10 579 [published Online First: 2019/03/13]  
11 580 51. Coyne SM, Rogers AA, Zurcher JD, et al. Does time spent using social media impact mental  
12 581 health?: An eight year longitudinal study. *Computers in human behavior* 2020;104:106160.  
13 582 doi: 10.1016/j.chb.2019.106160  
14 583 52. Verhaeghe P. What about me? The struggle for identity in a market-based society. London:  
15 584 Scribe Publications Pty Ltd 2014.  
16 585 53. Røgeberg O. Fire av fem nordmenn bruker sosiale medier [Four out of five Norwegians use social  
17 586 media]. Oslo: Statistics Norway; 2018 [Available from: [https://www.ssb.no/teknologi-og-](https://www.ssb.no/teknologi-og-innovasjon/artikler-og-publikasjoner/fire-av-fem-nordmenn-bruker-sosiale-medier)  
18 587 [innovasjon/artikler-og-publikasjoner/fire-av-fem-nordmenn-bruker-sosiale-medier](https://www.ssb.no/teknologi-og-innovasjon/artikler-og-publikasjoner/fire-av-fem-nordmenn-bruker-sosiale-medier) accessed  
19 588 13. Apr 2022.  
20 589 54. Thompson S, Cylus J, Evenovits T. Can people afford to pay for health care? New evidence on  
21 590 financial protection in Europe. Copenhagen, 2019.  
22 591 55. Storeng SH, Krokstad S, Westin S, et al. Decennial trends and inequalities in healthy life  
23 592 expectancy: The HUNT Study, Norway. *Scand J Public Health* 2018;46(1):124-31. doi:  
24 593 10.1177/1403494817695911 [published Online First: 2017/12/02]  
25 594 56. Worthy DA, Gorlick MA, Pacheco JL, et al. With age comes wisdom: decision making in younger  
26 595 and older adults. *Psychol Sci* 2011;22(11):1375-80. doi: 10.1177/0956797611420301  
27 596 [published Online First: 2011/10/01]  
28 597 57. Krokstad S, Westin S. Disability in society-medical and non-medical determinants for disability  
29 598 pension in a Norwegian total county population study. *Soc Sci Med* 2004;58(10):1837-48.  
30 599 doi: 10.1016/s0277-9536(03)00409-x [published Online First: 2004/03/17]  
31 600 58. Trends in adult body-mass index in 200 countries from 1975 to 2014: a pooled analysis of 1698  
32 601 population-based measurement studies with 19.2 million participants. *Lancet*  
33 602 2016;387(10026):1377-96. doi: 10.1016/s0140-6736(16)30054-x [published Online First:  
34 603 2016/04/27]  
35 604 59. Langhammer A, Krokstad S, Romundstad P, et al. The HUNT study: participation is associated  
36 605 with survival and depends on socioeconomic status, diseases and symptoms. *BMC Med Res*  
37 606 *Methodol* 2012;12:143. doi: 10.1186/1471-2288-12-143 [published Online First: 2012/09/18]  
38 607 60. Weiss D. Round hole, square peg: a discourse analysis of social inequalities and the political  
39 608 legitimization of health technology in Norway. *BMC Public Health* 2019;19(1):1691. doi:  
40 609 10.1186/s12889-019-8023-3 [published Online First: 2019/12/18]  
41 610 61. Kickbusch I. Addressing the interface of the political and commercial determinants of health.  
42 611 *Health Promot Int* 2012;27(4):427-8. doi: 10.1093/heapro/das057 [published Online First:  
43 612 2012/11/13]  
44 613 62. McKee M, Stuckler D. Revisiting the Corporate and Commercial Determinants of Health. *Am J*  
45 614 *Public Health* 2018;108(9):1167-70. doi: 10.2105/ajph.2018.304510 [published Online First:  
46 615 2018/07/20]  
47 616 63. Pape K, Bjørngaard JH, Holmen TL, et al. The welfare burden of adolescent anxiety and  
48 617 depression: a prospective study of 7500 young Norwegians and their families: the HUNT  
49 618 study. *BMJ Open* 2012;2(6) doi: 10.1136/bmjopen-2012-001942 [published Online First:  
50 619 2012/11/13]  
51  
52  
53  
54  
55  
56  
57 620  
58  
59  
60

# HUNT



1  
2  
3  
4  
5  
6  
7  
8  
9  
10  
11  
12  
13  
14  
15  
16  
17  
18  
19  
20  
21  
22  
23  
24  
25  
26  
27  
28  
29  
30  
31  
32  
33  
34  
35  
36  
37  
38  
39  
40  
41

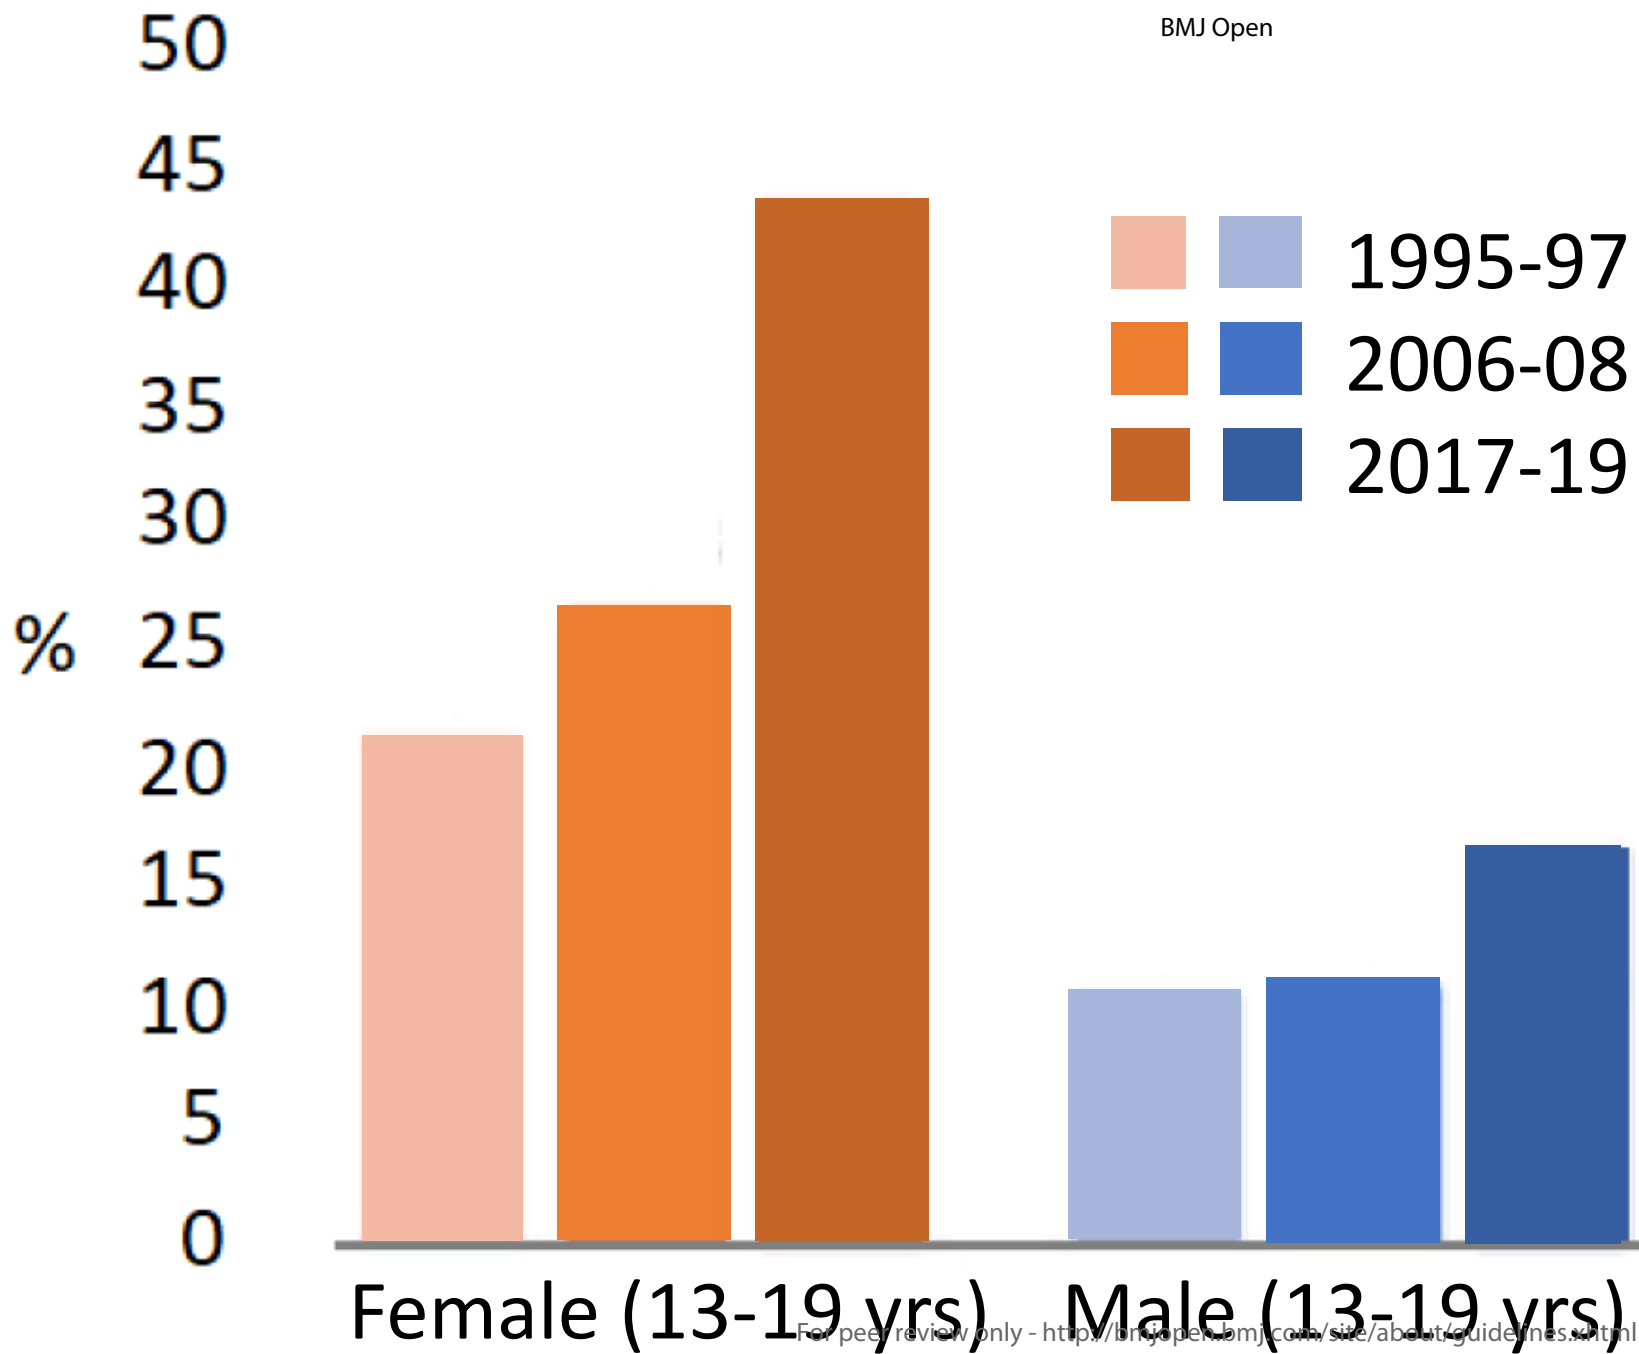

Female (13-19 yrs) Male (13-19 yrs)

1  
2  
3  
4  
5  
6  
7  
8  
9  
10  
11  
12  
13  
14  
15  
16  
17  
18  
19  
20  
21  
22  
23  
24  
25  
26  
27  
28  
29  
30  
31  
32  
33  
34  
35  
36  
37  
38  
39  
40  
41

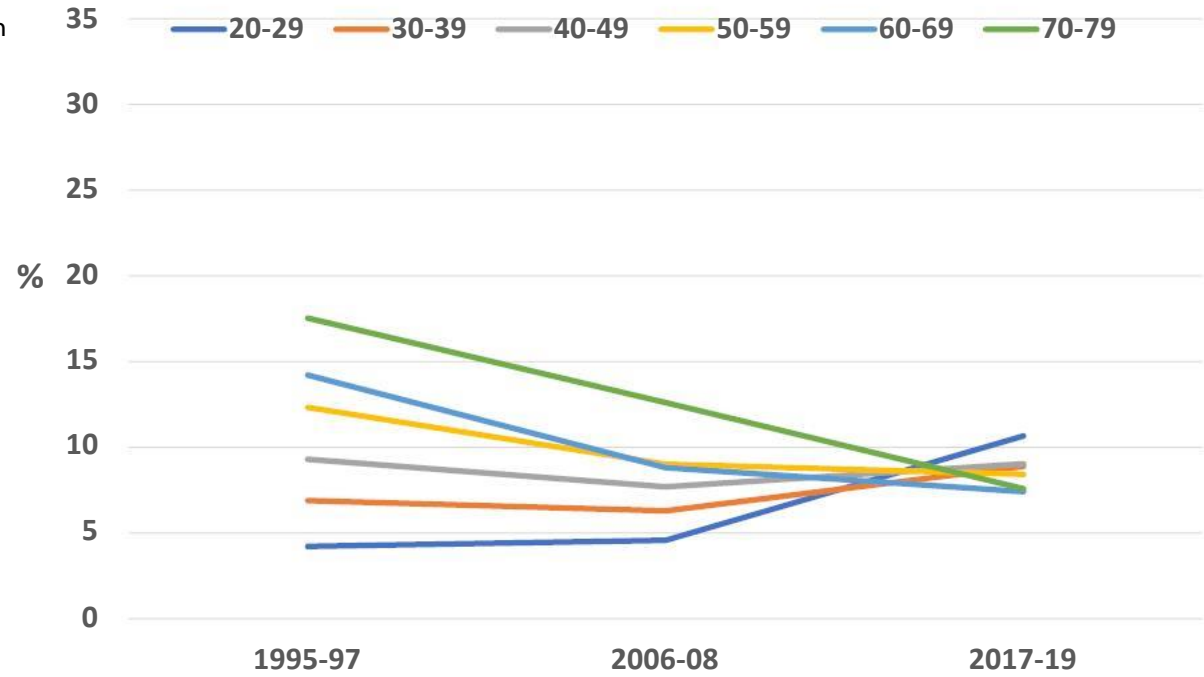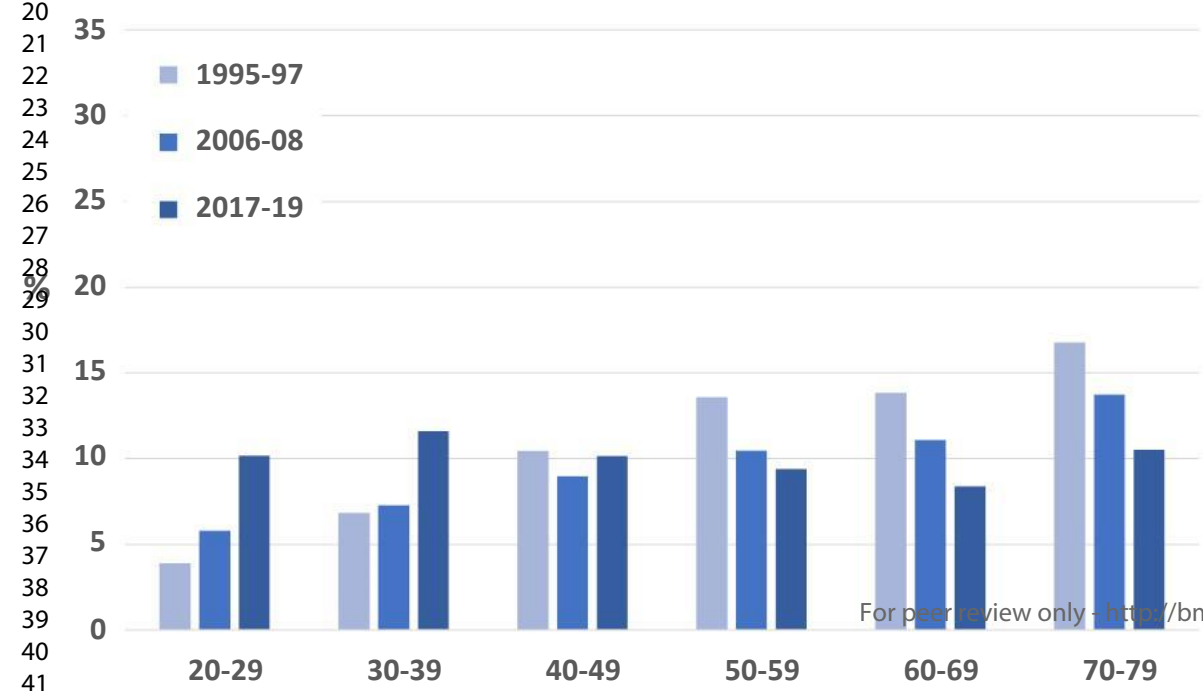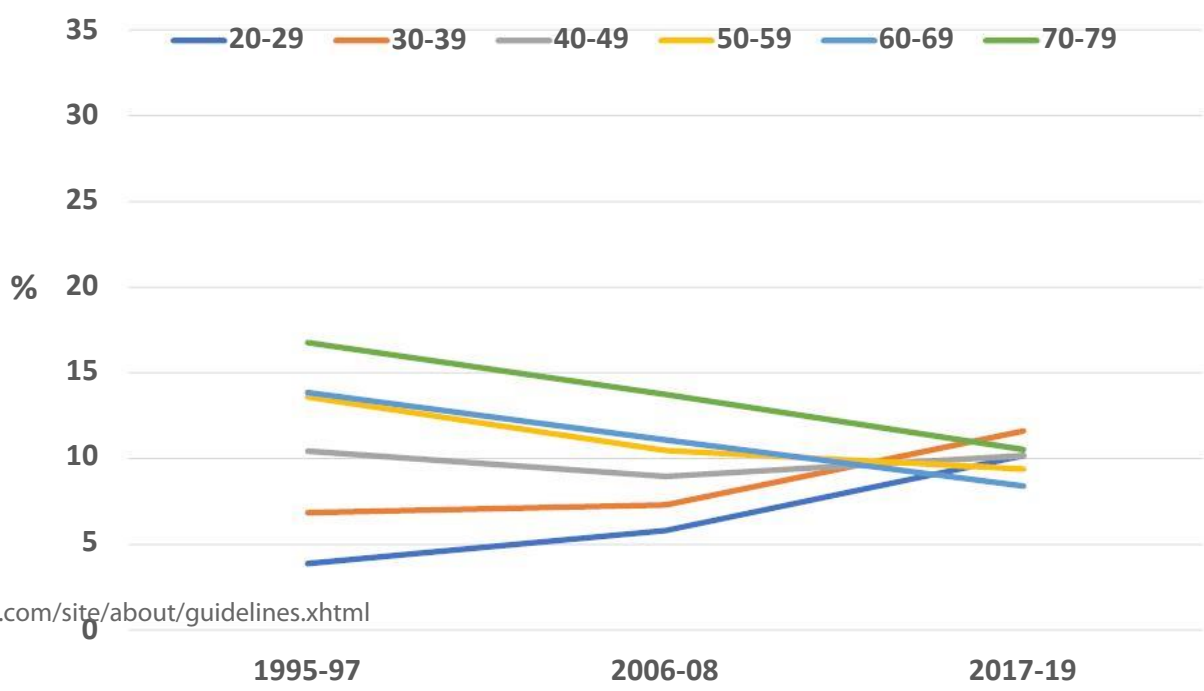

1  
2  
3  
4  
5  
6  
7  
8  
9  
10  
11  
12  
13  
14  
15  
16  
17  
18  
19  
20  
21  
22  
23  
24  
25  
26  
27  
28  
29  
30  
31  
32  
33  
34  
35  
36  
37  
38  
39  
40  
41



## Appendix table 1

Appendix table 1. Prevalence (%) and 95 percent confidence interval (95% CI) for symptoms of poor mental health by age group and sex.

|                 |       | HUNT2      |               | HUNT3         |               | HUNT4         |               | P-value<br>for trend |       |
|-----------------|-------|------------|---------------|---------------|---------------|---------------|---------------|----------------------|-------|
|                 |       | Prevalence | 95% CI        | Prevalence    | 95% CI        | Prevalence    | 95% CI        |                      |       |
| HADS depression |       |            |               |               |               |               |               |                      |       |
| Women           | 20-29 | 4.2        | (3.7 - 4.8)   | 4.6           | (3.7 - 5.7)   | 10.7          | (9.5 - 12.0)  | 0.000                |       |
|                 | 30-39 | 6.9        | (6.3 - 7.6)   | 6.3           | (5.5 - 7.2)   | 8.9           | (7.9 - 10.1)  | 0.004                |       |
|                 | 40-49 | 9.3        | (8.6 - 10.0)  | 7.7           | (6.9 - 8.5)   | 9.0           | (8.2 - 10.0)  | 0.377                |       |
|                 | 50-59 | 12.3       | (11.5 - 13.3) | 9.0           | (8.3 - 9.9)   | 8.4           | (7.7 - 9.3)   | 0.000                |       |
|                 | 60-69 | 14.2       | (13.2 - 15.3) | 8.8           | (8.0 - 9.7)   | 7.4           | (6.7 - 8.2)   | 0.000                |       |
| Men             | 70-79 | 17.5       | (16.3 - 18.9) | 12.6          | (11.4 - 14.0) | 7.6           | (6.8 - 8.5)   | 0.000                |       |
|                 | 20-29 | 3.9        | (3.3 - 4.5)   | 5.8           | (4.5 - 7.4)   | 10.2          | (8.7 - 11.9)  | 0.000                |       |
|                 | 30-39 | 6.9        | (6.2 - 7.6)   | 7.3           | (6.2 - 8.6)   | 11.6          | (10.2 - 13.2) | 0.000                |       |
|                 | 40-49 | 10.4       | (9.7 - 11.2)  | 9.0           | (8.0 - 10.0)  | 10.2          | (9.0 - 11.4)  | 0.358                |       |
|                 | 50-59 | 13.6       | (12.7 - 14.6) | 10.5          | (9.6 - 11.4)  | 9.4           | (8.5 - 10.4)  | 0.000                |       |
| HADS anxiety    | 60-69 | 13.9       | (12.8 - 15.0) | 11.1          | (10.2 - 12.1) | 8.4           | (7.6 - 9.3)   | 0.000                |       |
|                 | 70-79 | 16.8       | (15.4 - 18.2) | 13.7          | (12.4 - 15.2) | 10.5          | (9.5 - 11.6)  | 0.000                |       |
|                 | Women | 20-29      | 15.5          | (14.4 - 16.5) | 19.1          | (17.4 - 21.0) | 32.0          | (30.1 - 33.9)        | 0.000 |
|                 |       | 30-39      | 17.1          | (16.1 - 18.1) | 17.8          | (16.5 - 19.2) | 26.7          | (25.1 - 28.4)        | 0.000 |
|                 |       | 40-49      | 17.9          | (17.0 - 18.9) | 17.1          | (16.0 - 18.2) | 22.1          | (20.8 - 23.4)        | 0.000 |
| 50-59           |       | 18.6       | (17.5 - 19.8) | 18.0          | (17.0 - 19.1) | 20.4          | (19.3 - 21.6) | 0.028                |       |
| 60-69           |       | 18.0       | (16.7 - 19.3) | 16.4          | (15.4 - 17.6) | 17.9          | (16.8 - 19.0) | 0.896                |       |
| Men             | 70-79 | 17.2       | (15.7 - 18.8) | 17.2          | (15.8 - 18.8) | 16.2          | (15.0 - 17.4) | 0.290                |       |
|                 | 20-29 | 11.9       | (10.9 - 13.0) | 12.0          | (10.2 - 14.2) | 19.0          | (17.0 - 21.2) | 0.000                |       |
|                 | 30-39 | 12.9       | (12.0 - 13.9) | 11.4          | (10.0 - 12.9) | 18.8          | (17.0 - 20.7) | 0.000                |       |
|                 | 40-49 | 14.0       | (13.2 - 15.0) | 12.5          | (11.4 - 13.7) | 16.5          | (15.1 - 18.0) | 0.030                |       |
|                 | 50-59 | 12.5       | (11.6 - 13.5) | 11.7          | (10.8 - 12.7) | 15.2          | (14.0 - 16.4) | 0.001                |       |
| 60-69           |       | 9.2        | (8.3 - 10.2)  | 8.5           | (7.6 - 9.4)   | 11.0          | (10.1 - 12.0) | 0.004                |       |
|                 | 70-79 | 9.4        | (8.2 - 10.6)  | 6.5           | (5.6 - 7.6)   | 8.4           | (7.5 - 9.4)   | 0.325                |       |

STROBE Statement—Checklist of items that should be included in reports of *cross-sectional studies*

The following recommendations were followed if applicable for the manuscript: Paradoxical trends in mental health in the society and the root causes of increased mental health problems among young people. The HUNT Study, Norway.

|                           | Item No | Recommendation                                                                                                                                                                                    | Page in manus. |
|---------------------------|---------|---------------------------------------------------------------------------------------------------------------------------------------------------------------------------------------------------|----------------|
| <b>Title and abstract</b> | 1       | (a) Indicate the study's design with a commonly used term in the title or the abstract                                                                                                            | 2              |
|                           |         | (b) Provide in the abstract an informative and balanced summary of what was done and what was found                                                                                               | 2              |
| <b>Introduction</b>       |         |                                                                                                                                                                                                   |                |
| Background/rationale      | 2       | Explain the scientific background and rationale for the investigation being reported                                                                                                              | 3              |
| Objectives                | 3       | State specific objectives, including any prespecified hypotheses                                                                                                                                  | 4              |
| <b>Methods</b>            |         |                                                                                                                                                                                                   |                |
| Study design              | 4       | Present key elements of study design early in the paper                                                                                                                                           | 4-5            |
| Setting                   | 5       | Describe the setting, locations, and relevant dates, including periods of recruitment, exposure, follow-up, and data collection                                                                   | 4              |
| Participants              | 6       | (a) Give the eligibility criteria, and the sources and methods of selection of participants                                                                                                       | 4              |
| Variables                 | 7       | Clearly define all outcomes, exposures, predictors, potential confounders, and effect modifiers. Give diagnostic criteria, if applicable                                                          | 4-5            |
| Data sources/measurement  | 8*      | For each variable of interest, give sources of data and details of methods of assessment (measurement). Describe comparability of assessment methods if there is more than one group              | 4-5            |
| Bias                      | 9       | Describe any efforts to address potential sources of bias                                                                                                                                         | 11             |
| Study size                | 10      | Explain how the study size was arrived at                                                                                                                                                         | 4              |
| Quantitative variables    | 11      | Explain how quantitative variables were handled in the analyses. If applicable, describe which groupings were chosen and why                                                                      | 4              |
| Statistical methods       | 12      | (a) Describe all statistical methods, including those used to control for confounding                                                                                                             | 4              |
|                           |         | (b) Describe any methods used to examine subgroups and interactions                                                                                                                               | 4              |
|                           |         | (c) Explain how missing data were addressed                                                                                                                                                       | 5-6            |
|                           |         | (d) If applicable, describe analytical methods taking account of sampling strategy                                                                                                                | Na             |
|                           |         | (e) Describe any sensitivity analyses                                                                                                                                                             | Na             |
| <b>Results</b>            |         |                                                                                                                                                                                                   |                |
| Participants              | 13*     | (a) Report numbers of individuals at each stage of study—eg numbers potentially eligible, examined for eligibility, confirmed eligible, included in the study, completing follow-up, and analysed | 4              |
|                           |         | (b) Give reasons for non-participation at each stage                                                                                                                                              | 4              |
|                           |         | (c) Consider use of a flow diagram                                                                                                                                                                |                |
| Descriptive data          | 14*     | (a) Give characteristics of study participants (eg demographic, clinical, social) and information on exposures and potential confounders                                                          | 5              |
|                           |         | (b) Indicate number of participants with missing data for each variable of interest                                                                                                               | 5              |



|                          |     |                                                                                                                                                                                                              |             |
|--------------------------|-----|--------------------------------------------------------------------------------------------------------------------------------------------------------------------------------------------------------------|-------------|
| Outcome data             | 15* | Report numbers of outcome events or summary measures                                                                                                                                                         | 5           |
| Main results             | 16  | (a) Give unadjusted estimates and, if applicable, confounder-adjusted estimates and their precision (eg, 95% confidence interval). Make clear which confounders were adjusted for and why they were included | 6-9         |
|                          |     | (b) Report category boundaries when continuous variables were categorized                                                                                                                                    | 5-9         |
|                          |     | (c) If relevant, consider translating estimates of relative risk into absolute risk for a meaningful time period                                                                                             |             |
| Other analyses           | 17  | Report other analyses done—eg analyses of subgroups and interactions, and sensitivity analyses                                                                                                               | Na          |
| <b>Discussion</b>        |     |                                                                                                                                                                                                              |             |
| Key results              | 18  | Summarise key results with reference to study objectives                                                                                                                                                     | 9           |
| Limitations              | 19  | Discuss limitations of the study, taking into account sources of potential bias or imprecision. Discuss both direction and magnitude of any potential bias                                                   | 11          |
| Interpretation           | 20  | Give a cautious overall interpretation of results considering objectives, limitations, multiplicity of analyses, results from similar studies, and other relevant evidence                                   | 9-10, 11-12 |
| Generalisability         | 21  | Discuss the generalisability (external validity) of the study results                                                                                                                                        | 10          |
| <b>Other information</b> |     |                                                                                                                                                                                                              |             |
| Funding                  | 22  | Give the source of funding and the role of the funders for the present study and, if applicable, for the original study on which the present article is based                                                | 13          |

\*Give information separately for exposed and unexposed groups.

**Note:** An Explanation and Elaboration article discusses each checklist item and gives methodological background and published examples of transparent reporting. The STROBE checklist is best used in conjunction with this article (freely available on the Web sites of PLoS Medicine at <http://www.plosmedicine.org/>, Annals of Internal Medicine at <http://www.annals.org/>, and Epidemiology at <http://www.epidem.com/>). Information on the STROBE Initiative is available at [www.strobe-statement.org](http://www.strobe-statement.org).
