# Supplementary material for: Divergent decennial trends in mental health according to age reveal poorer mental health for young people: repeated cross-sectional population-based surveys from the HUNT Study, Norway
Source: PubMed Central journal article supplement — BMJ Open. 2022 May 17;12(5):e057654. doi: 10.1136/bmjopen-2021-057654 (PMC9119156; doi:10.1136/bmjopen-2021-057654), 2022-05-17
Supplement: bmjopen-2021-057654supp001.pdf [file bmjopen-2021-057654supp001.pdf]

## Appendix table 1

Appendix table 1. Prevalence (%) and 95 percent confidence interval (95% CI) for symptoms of poor mental health by age group and sex.

|                 |       | HUNT2         |               | HUNT3         |               | HUNT4         |               | P-value<br>for trend |  |
|-----------------|-------|---------------|---------------|---------------|---------------|---------------|---------------|----------------------|--|
|                 |       | Prevalence    | 95% CI        | Prevalence    | 95% CI        | Prevalence    | 95% CI        |                      |  |
| HADS depression |       |               |               |               |               |               |               |                      |  |
| Women           | 20-29 | 4.2           | (3.7 - 4.8)   | 4.6           | (3.7 - 5.7)   | 10.7          | (9.5 - 12.0)  | 0.000                |  |
|                 | 30-39 | 6.9           | (6.3 - 7.6)   | 6.3           | (5.5 - 7.2)   | 8.9           | (7.9 - 10.1)  | 0.004                |  |
|                 | 40-49 | 9.3           | (8.6 - 10.0)  | 7.7           | (6.9 - 8.5)   | 9.0           | (8.2 - 10.0)  | 0.377                |  |
|                 | 50-59 | 12.3          | (11.5 - 13.3) | 9.0           | (8.3 - 9.9)   | 8.4           | (7.7 - 9.3)   | 0.000                |  |
|                 | 60-69 | 14.2          | (13.2 - 15.3) | 8.8           | (8.0 - 9.7)   | 7.4           | (6.7 - 8.2)   | 0.000                |  |
| Men             | 70-79 | 17.5          | (16.3 - 18.9) | 12.6          | (11.4 - 14.0) | 7.6           | (6.8 - 8.5)   | 0.000                |  |
|                 | 20-29 | 3.9           | (3.3 - 4.5)   | 5.8           | (4.5 - 7.4)   | 10.2          | (8.7 - 11.9)  | 0.000                |  |
|                 | 30-39 | 6.9           | (6.2 - 7.6)   | 7.3           | (6.2 - 8.6)   | 11.6          | (10.2 - 13.2) | 0.000                |  |
|                 | 40-49 | 10.4          | (9.7 - 11.2)  | 9.0           | (8.0 - 10.0)  | 10.2          | (9.0 - 11.4)  | 0.358                |  |
|                 | 50-59 | 13.6          | (12.7 - 14.6) | 10.5          | (9.6 - 11.4)  | 9.4           | (8.5 - 10.4)  | 0.000                |  |
| HADS anxiety    | 60-69 | 13.9          | (12.8 - 15.0) | 11.1          | (10.2 - 12.1) | 8.4           | (7.6 - 9.3)   | 0.000                |  |
|                 | 70-79 | 16.8          | (15.4 - 18.2) | 13.7          | (12.4 - 15.2) | 10.5          | (9.5 - 11.6)  | 0.000                |  |
|                 | Women |               |               |               |               |               |               |                      |  |
|                 | 20-29 | 15.5          | (14.4 - 16.5) | 19.1          | (17.4 - 21.0) | 32.0          | (30.1 - 33.9) | 0.000                |  |
|                 | 30-39 | 17.1          | (16.1 - 18.1) | 17.8          | (16.5 - 19.2) | 26.7          | (25.1 - 28.4) | 0.000                |  |
| 40-49           | 17.9  | (17.0 - 18.9) | 17.1          | (16.0 - 18.2) | 22.1          | (20.8 - 23.4) | 0.000         |                      |  |
| 50-59           | 18.6  | (17.5 - 19.8) | 18.0          | (17.0 - 19.1) | 20.4          | (19.3 - 21.6) | 0.028         |                      |  |
| 60-69           | 18.0  | (16.7 - 19.3) | 16.4          | (15.4 - 17.6) | 17.9          | (16.8 - 19.0) | 0.896         |                      |  |
| 70-79           | 17.2  | (15.7 - 18.8) | 17.2          | (15.8 - 18.8) | 16.2          | (15.0 - 17.4) | 0.290         |                      |  |
| Men             |       |               |               |               |               |               |               |                      |  |
| 20-29           | 11.9  | (10.9 - 13.0) | 12.0          | (10.2 - 14.2) | 19.0          | (17.0 - 21.2) | 0.000         |                      |  |
| 30-39           | 12.9  | (12.0 - 13.9) | 11.4          | (10.0 - 12.9) | 18.8          | (17.0 - 20.7) | 0.000         |                      |  |
| 40-49           | 14.0  | (13.2 - 15.0) | 12.5          | (11.4 - 13.7) | 16.5          | (15.1 - 18.0) | 0.030         |                      |  |
| 50-59           | 12.5  | (11.6 - 13.5) | 11.7          | (10.8 - 12.7) | 15.2          | (14.0 - 16.4) | 0.001         |                      |  |
| 60-69           | 9.2   | (8.3 - 10.2)  | 8.5           | (7.6 - 9.4)   | 11.0          | (10.1 - 12.0) | 0.004         |                      |  |
| 70-79           | 9.4   | (8.2 - 10.6)  | 6.5           | (5.6 - 7.6)   | 8.4           | (7.5 - 9.4)   | 0.325         |                      |  |
